1  
2  
3  
4  
5  
6  
7  
8  
9  
10  
11  
12  
13  
14  
15  
16  
17

Ubiquitin Ligase MARCH5 Regulates Apoptosis through Mediation of Stress-Induced and NOXA-Dependent MCL1 Degradation

Seiji Arai<sup>1,2</sup>, Sen Chen<sup>1</sup>, Lisha Xie<sup>1</sup>, and Steven P. Balk<sup>1\*</sup>

<sup>1</sup>Hematology-Oncology Division, Department of Medicine, and Cancer Center, Beth Israel Deaconess Medical Center and Harvard Medical School, Boston, Massachusetts 02215, USA

<sup>2</sup>Department of Urology, Gunma University Hospital, Maebashi, Gunma, Japan

\*To whom correspondence should be addressed: Steven P. Balk, sbalk@bidmc.harvard.edu

Running Title: MCL1 regulation by MARCH5

## 18 **Abstract**

19 MCL1 has critical antiapoptotic functions and its levels are tightly regulated by ubiquitylation  
20 and degradation, but mechanisms that drive this degradation, particularly in solid tumors, remain  
21 to be established. We show here in prostate cancer cells that increased NOXA, mediated by  
22 activation of an integrated stress response, drives the degradation of MCL1, and identify the  
23 mitochondria-associated ubiquitin ligase MARCH5 as the primary mediator of this NOXA-  
24 dependent MCL1 degradation. Therapies that enhance MARCH5-mediated MCL1 degradation  
25 markedly enhance apoptosis in response to a BH3 mimetic agent targeting BCLXL, which may  
26 provide for a broadly effective therapy in solid tumors. Conversely, increased MCL1 in response  
27 to MARCH5 loss does not sensitize to BH3 mimetic drugs targeting MCL1, but instead also  
28 sensitizes to BCLXL inhibition, revealing a codependence between MARCH5 and MCL1 that  
29 may also be exploited in tumors with *MARCH5* genomic loss.

## 31 **Introduction**

32 Androgen deprivation therapy to suppress activity of the androgen receptor (AR) is the standard  
33 treatment for metastatic prostate cancer (PCa), but tumors invariably recur (castration-resistant  
34 prostate cancer, CRPC). The majority will initially respond to agents that further suppress AR,  
35 but most men relapse within 1-2 years and these relapses appear to be driven by multiple AR  
36 dependent and independent mechanisms (1,2), which may include increased expression of anti-  
37 apoptotic proteins. The anti-apoptotic BCL2 family proteins (including BCL2, BCLXL, and  
38 MCL1) act by neutralizing BAX and BAK, and by inhibiting the BH3-only pro-apoptotic  
39 proteins that can activate BAX/BAK (primarily BIM) (3). These interactions are mediated by the  
40 BH3 domain, and BH3-mimetic drugs can enhance apoptosis by mimicking the activity of BH3-  
41 only pro-apoptotic proteins and thereby antagonizing the anti-apoptotic BCL2 family proteins  
42 (4,5). ABT-737 (6) and ABT-263 (navitoclax, orally bioavailable analogue of ABT-737) (7) are  
43 BH3-mimetics that directly bind to BCL2, BCLXL, and BCLW (but not MCL1), which blocks

44 their binding to pro-apoptotic BH3 only proteins such as BIM and their ability to neutralize  
45 BAX/BAK. Navitoclax has single-agent activity in hematological malignancies (8), but causes  
46 thrombocytopenia due to BCLXL inhibition. A BCL2-specific agent that spares platelets (ABT-  
47 199, venetoclax) is similarly active and is now FDA approved for chronic lymphocytic leukemia  
48 (9,10).

49 In contrast, most solid tumors are resistant to these agents (11), which appears to reflect an  
50 important role for MCL1 (11-16). Indeed, preclinical studies indicate that navitoclax may be  
51 efficacious in solid tumors when used in combination with other agents acting through a variety  
52 of mechanisms, including by decreasing MCL1 expression (11,16-22). BH3 mimetics that target  
53 MCL1 (including AMG176, S63845 and AZD5991) are now becoming available and may have  
54 single agent activity in a subset of tumors (23-28), but efficacy in most solid tumors will likely  
55 still require combination therapies (4,23,26). Moreover, the toxicities associated with direct  
56 MCL1 antagonists, alone or in combination therapies, remain to be determined.

57 We reported previously that navitoclax (acting through BCLXL blockade), in combination  
58 with several kinase inhibitors (erlotinib, lapatinib, cabozantinib, sorafenib) could induce rapid  
59 and marked apoptotic responses in PCa cells (22). This response was preceded by a dramatic  
60 increase in MCL1 degradation, and we confirmed that navitoclax could drive apoptotic responses  
61 in vitro and in vivo in PCa cell that were depleted of MCL1 by RNAi or CRISPR. Significantly,  
62 the enhanced MCL1 degradation in response to kinase inhibitors was not mediated by well-  
63 established mechanisms including through GSK3 $\beta$ -mediated phosphorylation (and the  
64 downstream ubiquitin ligases  $\beta$ TrCP or Fbw7), or by the ubiquitin ligase HUWE1/MULE that  
65 has been reported to mediate both basal MCL1 degradation and MCL1 degradation in response  
66 to DNA damage and NOXA binding (29-32).

67 In this study we found that treatment with kinase inhibitors initiates an integrated stress  
68 response (ISR) leading to increased ATF4 protein and subsequent increased transcription of  
69 NOXA, and that the enhanced degradation of MCL1 was NOXA-dependent. We further  
70 identified the mitochondria-associated ubiquitin ligase MARCH5 as the mediator of this stress-  
71 induced and NOXA-dependent MCL1 degradation. MARCH5 is a RING-finger E3 ligase with  
72 an established function in mediating the ubiquitylation and degradation of several proteins that  
73 regulate mitochondrial fission and fusion (33-37). MARCH5 depletion both abrogated the  
74 decrease in MCL1 in response to cellular stress and substantially increased basal MCL1 in

75 multiple epithelial cancer cell lines, indicating that MARCH5 makes a major contribution to  
76 regulating MCL1 levels under basal conditions and in responses to cellular stress. Significantly,  
77 while the MARCH5 mediated degradation of MCL1 markedly sensitized tumor cells to BCLXL  
78 inhibition, MARCH5 depletion, which occurs in ~5% of PCa, also sensitized to BCLXL  
79 inhibition despite increased MCL1, revealing a codependency between MCL1 and MARCH5.  
80 Together these results reveal therapeutic opportunities for the use of agents targeting BCLXL in  
81 solid tumors.

82

## 83 **Results**

84

### 85 **NOXA upregulation mediates increased MCL1 degradation in PCa cells**

86 As we reported previously, multiple kinase inhibitors including the EGFR inhibitor erlotinib  
87 could rapidly (within 4 hours) and markedly enhance the proteasome-dependent degradation of  
88 MCL1 (Figure S1A,B). Moreover, we found that this occurred by a mechanism that was  
89 independent of the ubiquitin ligase HUWE1 (MULE) and of ubiquitin ligases downstream of  
90 GSK3 $\beta$  ( $\beta$ TRCP, FBW7) (22). BIM and NOXA are the primary BH3-only proteins that bind  
91 MCL1, and can increase or decrease its stability, respectively (32,38,39). Consistent with our  
92 previous results, 4 hour treatment with erlotinib did not decrease BIM, indicating that loss of  
93 BIM is not a basis for the marked decrease in MCL1 protein (Figure 1A). In contrast, NOXA  
94 expression was increased by erlotinib, suggesting this may drive the increased MCL1  
95 degradation. Indeed, depleting NOXA with 3 different siRNA suppressed this decrease in MCL1  
96 (Figure 1B). Moreover, more complete depletion of NOXA with the pooled siRNAs prevented  
97 the erlotinib-mediated MCL1 reduction, indicating a NOXA-dependent mechanism for  
98 decreasing MCL1 (Figure 1C). In contrast, while depletion of BIM by siRNA caused a decrease  
99 in basal MCL1, it did not prevent the further decrease in MCL1 in response to erlotinib (Figure  
100 1D).

101 Erlotinib rapidly (within 2 hours) upregulated NOXA mRNA (Figure 1E), indicating a  
102 transcriptional mechanism for increasing NOXA protein. Consistent with this finding, inhibiting  
103 new synthesis of mRNA with actinomycin D decreased basal NOXA protein, and prevented the  
104 erlotinib-mediated upregulation of NOXA (Figure 1F). Actinomycin D similarly decreased basal

105 MCL1 protein expression through transcriptional repression, but importantly prevented the  
106 erlotinib-mediated MCL1 reduction (Figure 1F).

107 BH3-mimetic agents that occlude the BH3 binding site of MCL1, and would therefore  
108 prevent binding of BIM and NOXA, have recently been developed (23,27,28). Therefore, we  
109 tested whether one such agent (S63845), by competing with NOXA for binding to MCL1, could  
110 prevent the erlotinib-mediated decrease in MCL1. Significantly, S63845 increased basal MCL1  
111 expression and prevented the erlotinib-mediated decrease in MCL1 (Figure 1G). Together, these  
112 data show that erlotinib induces transcriptional upregulation of NOXA, and indicate that this  
113 increase in NOXA is directly enhancing MCL1 degradation.

114

### 115 **NOXA upregulation is mediated by the integrated stress response**

116 To determine how erlotinib was increasing NOXA transcription we first focused on p53, as  
117 NOXA is a major transcriptional target of p53. However, treatment with erlotinib did not cause  
118 any change in p53 expression (Figure 2A; Figure S1A), indicating a p53 independent mechanism  
119 for increasing NOXA mRNA. The alternative p53-independent pathway that may increase  
120 NOXA transcription is the integrated stress response (ISR), which can be triggered by factors  
121 including hypoxia, glucose or amino acid depletion, genotoxic stress, and the endoplasmic  
122 reticulum stress/unfolded protein response (40). These stresses activate kinases including PERK  
123 (in response to endoplasmic reticulum stress), GCN2 (in response to amino acid starvation), and  
124 PKR (in response dsRNA and additional cellular stresses), which converge on phosphorylation  
125 of eIF2 $\alpha$  (30,41-43). Consistent with ISR activation, we found that erlotinib rapidly (within 30  
126 minutes) increased phosphorylation of eIF2 $\alpha$  (Figure 2B). The phosphorylation of eIF2 $\alpha$  causes  
127 an increase in translation of the transcription factor ATF4, which can then stimulate the  
128 expression of multiple genes to either resolve the cellular stress or drive to apoptosis. Indeed,  
129 eIF2 $\alpha$  phosphorylation in response to erlotinib was associated with an increase in ATF4 protein  
130 (Figure 2B).

131 With respect to NOXA, ATF4 can directly or as a heterodimer with ATF3 stimulate  
132 expression of NOXA (41,43), although this is generally observed after prolonged stress.  
133 Nonetheless, an increase in NOXA protein was observed after 60 - 90 minutes of erlotinib  
134 treatment, and this rapid time course coincided with the increase in ATF4 and decrease in MCL1  
135 (Figure 2B). Moreover, treatment with an ISR inhibitor (ISRIB), which suppresses the effects of

136 eIF2 $\alpha$  phosphorylation (44), decreased basal ATF4 and suppressed the erlotinib-mediated  
137 increase in ATF4 and NOXA, providing further evidence for this pathway (Figure 2C).  
138 Consistent with these findings, ISRIB suppressed the erlotinib-mediated increase in NOXA  
139 mRNA (Figure 2D), while MCL1 mRNA was unaffected by these treatments (Figure 2E).  
140 Together, these findings indicate that activation of the ISR by erlotinib drives the rapid induction  
141 of NOXA, which then promotes MCL1 degradation.

142

### 143 **MARCH5 mediates kinase inhibitor/NOXA-dependent MCL1 degradation**

144 We next sought to identify E3 ligases that contribute to kinase inhibitor-mediated and NOXA-  
145 dependent MCL1 degradation. MCL1 is a substrate for the ubiquitin ligase HUWE1 (MULE),  
146 and HUWE1 has been reported to mediate MCL1 degradation by NOXA (29-31). However, we  
147 reported previously that while HUWE1 depletion could increase basal MCL1 levels, it did not  
148 prevent the increased degradation of MCL1 in response to kinase inhibitors (22). Figure 3A  
149 shows that HUWE1 depletion does not affect the erlotinib-mediated increase in NOXA, and that  
150 it does not prevent the subsequent decrease in MCL1.

151 NEDD8 conjugation is essential for cullin-dependent E3 ligases to ubiquitylate their  
152 substrates. To determine the role of cullin-dependent E3 ligases in MCL1 degradation in  
153 response to tyrosine kinase inhibition, we examined whether NEDD8 inhibition could prevent  
154 the effect of tyrosine kinase inhibitors. Treatment with NEDD8 inhibitor MLN4924 increased  
155 p27 (a known target of cullin-dependent E3 ligase CUL4), but did not increase MCL1 or block  
156 the effects of erlotinib (Figure 3B). Indeed, MLN4924 moderately decreased MCL1 protein,  
157 which may be due to an increase in NOXA, whose degradation is mediated by a cullin-dependent  
158 E3 ligase (45). MLN4924 similarly failed to prevent the decrease in MCL1 in response to  
159 lapatinib (EGFR/ERBB2 inhibitor) (Figure 3C), indicating that a cullin-independent mechanism  
160 is driving the increased MCL1 degradation.

161 We then hypothesized that a cullin-independent E3 ligase that localizes to mitochondria,  
162 where MCL1 is mainly located, may promote MCL1 degradation in response to tyrosine kinase  
163 inhibition. To assess this hypothesis, we first examined the well-known mitochondria-associated  
164 cullin-independent E3 ligase PARKIN, which has been implicated as a ubiquitin ligase for  
165 MCL1 (46). However, while PARKIN depletion increased its target protein p62, it did not  
166 increase MCL1 or block the effect of erlotinib (Figure 3D). MARCH5 is another mitochondria-

167 associated cullin-independent E3 ligase that has been implicated as a regulator of MCL1 (37,47).  
168 Significantly, depleting MARCH5 with siRNA increased basal expression of MCL1 and a  
169 known MARCH5 substrate, MiD49, in LNCaP cells (Figure 3E and Figure S2A). MARCH5  
170 depletion did not increase MCL1 mRNA (Figure S2B), further supporting a posttranscriptional  
171 mechanism for increasing MCL1. MARCH5 depletion also increased basal MCL1 in PC3 PCa  
172 cells (Figure 3F) and in additional prostate, breast and lung cancer cell lines (Figure S2C-H).  
173 These results show that MARCH5 is a major mediator of basal MCL1 degradation in epithelial  
174 cancer cell lines.

175 Significantly, MARCH5 depletion prevented the decrease in MCL1 by erlotinib and  
176 cabozantinib (C-MET/VEGFR2 inhibitor) in LNCaP and PC3 cells (Figure 3E-G), indicating  
177 that the decreases in MCL1 by these kinase inhibitors are mediated by MARCH5. In contrast,  
178 MARCH5 depletion did not prevent MCL1 loss in cells treated with dinaciclib (Figure 3E),  
179 which decreases MCL1 mRNA through inhibition of CDK9 and subsequent decrease in MCL1  
180 transcription. To confirm these findings, we then used CRISPR/CAS9 to delete MARCH5.  
181 Consistent with the RNAi results, there was a marked increase of MCL1 expression, as well of  
182 the MARCH5 substrate MiD49, in each of three MARCH5 depleted lines (Figure 3H).  
183 Moreover, erlotinib no longer decreased MCL1 in these MARCH5 depleted lines (Figure 3H).  
184 As expected, transient overexpression of exogenous MARCH5 decreased MCL1 in control and  
185 MARCH5 depleted cells (Figure 3I).

186 Interestingly, and consistent with a previous report (47), MARCH5 depletion by CRISPR or  
187 siRNA also increased NOXA protein (Figure 3H and Figure S3A, respectively). MARCH5  
188 depletion did not increase, but instead decreased NOXA mRNA (Figure S3B), indicating this  
189 increase in NOXA protein is through a post-transcriptional mechanism. One plausible  
190 mechanism is through increased binding to MCL1, as a previous study found that MCL1 could  
191 protect NOXA from proteasome-mediated degradation (48). Consistent with this mechanism, the  
192 increased levels of NOXA and of BIM in MARCH5 depleted cells coincided with increased  
193 binding of these proteins to MCL1 (Figure 3J). To further assess this mechanism, we treated  
194 cells with an MCL1-targeted BH3 mimetic agent, S63845, to interfere with BH3 domain  
195 mediated interactions with MCL1. Significantly, S63845 decreased both NOXA and BIM in the  
196 MARCH5 depleted cells, consistent with them being stabilized by MCL1 (Figure 3K). Of note,  
197 S63845 increased MCL1 in both the control and MARCH5 depleted cells, indicating that



198 additional ubiquitin ligases may partially compensate for MARCH5 loss in driving basal MCL1  
199 degradation.

200 We also examined the effects on NOXA and BIM of depleting or overexpressing MCL1.  
201 Cells with CRISPR-mediated MCL1 depletion had markedly reduced NOXA and BIM,  
202 providing further evidence that MCL1 protects both from degradation (Figure 3L). Conversely,  
203 NOXA and BIM were increased in cells that overexpress ectopic MCL1 (Figure 3M). However,  
204 while MCL1 levels were comparable in cells overexpressing ectopic MCL1 and in MARCH5  
205 depleted cells, the increases in NOXA and BIM were greater in the latter MARCH5 depleted  
206 cells. One explanation for this difference with respect to NOXA (and possibly BIM) is that the  
207 MARCH5-mediated degradation of MCL1 in MCL1-NOXA complexes may be coupled to the  
208 degradation of NOXA by a distinct ubiquitin ligase.

209

#### 210 **EGFR inhibition does not alter MARCH5 expression or activity**

211 The above findings indicated that increased NOXA in response to erlotinib was driving the  
212 MARCH5-mediated ubiquitylation and degradation of MCL1. Consistent with this conclusion,  
213 we found by coimmunoprecipitation that erlotinib treatment, in combination with proteasome  
214 inhibition, enhanced the interaction between MARCH5 and MCL1 (Figure 4A). Importantly,  
215 phosphorylation of BIM and NOXA can modulate their interaction with MCL1, suggesting that  
216 kinase inhibitors may further be enhancing MCL1 ubiquitylation and degradation through effects  
217 on phosphorylation of BIM, NOXA, or MCL1 that modulate NOXA/BIM-MCL1 interactions  
218 (49-51). We have previously found that erlotinib did not alter MCL1 phosphorylation at sites that  
219 have been shown to enhance its ubiquitylation and degradation (22). To further assess the role of  
220 phosphorylation in erlotinib-mediated MCL1 degradation, we used phospho-tag gels and  
221 examined the phosphorylation state of these proteins. Erlotinib treatment did not have any clear  
222 effects on the phosphorylation of MCL1, BIM, or NOXA in cells cultured in complete medium  
223 (FBS) or cultured in medium with charcoal stripped serum (CSS) to deplete steroids (Figure 4B).  
224 Similarly, erlotinib did not alter phosphorylation in MARCH5 depleted cells. As a positive  
225 control, EGF stimulation dramatically increased BIM phosphorylation.

226 In parallel with the above experiments, we asked directly whether erlotinib enhances  
227 MCL1 interaction with NOXA versus BIM. This was assessed in MARCH5 knockout cells to  
228 avoid effects due to increased MCL1 interaction with MARCH5 by erlotinib. Erlotinib treatment



229 did not clearly enhance MCL1 binding of NOXA versus BIM (Figure 4C). As expected,  
230 treatment with S63845 decreased both NOXA and BIM binding to MCL1.

231 We next asked whether there were alterations in MARCH5 expression or activity that may be  
232 enhancing its ubiquitylation of MCL1. We first examined effects of erlotinib versus MARCH5  
233 depletion on MARCH5 substrates. Treatment with erlotinib again increased NOXA and  
234 decreased MCL1, but did not decrease other MARCH5 substrates (MiD49, MFN1, and  
235 FUNDC1) (Figure 4D). Interestingly, while MiD49 was increased in the MARCH5 knockout  
236 cells (see also Figure 3E and 3H), MFN1 and FUNDC1 were not altered, indicating that these  
237 latter substrates are not undergoing MARCH5-mediated degradation under basal conditions. In  
238 any case, this result indicates that erlotinib is not generally enhancing MARCH5 activity.

239 We then asked whether erlotinib alters the mitochondrial localization of MARCH5, or of  
240 MCL1. Consistent with previous reports, cellular fractionation showed that MARCH5 was  
241 primarily located to mitochondria (Figure 4E). Treatment with erlotinib for 2 hours (prior to a  
242 substantial decrease in MCL1) did not change this localization of MARCH5. Moreover, it did  
243 not increase the mitochondrial localization of MCL1, BIM or NOXA, indicating that erlotinib-  
244 mediated MCL1 degradation is not through increased targeting of these latter proteins to  
245 mitochondria. Finally, MARCH5 depletion did not clearly alter the fraction of MCL1 associated  
246 with mitochondria.

247 As MARCH5 may be activated by mitochondrial stress, we also asked whether tyrosine  
248 kinase inhibition had acute effects on mitochondria that may alter MARCH5 function. To  
249 address this we examined mitochondrial respiration in response to erlotinib or lapatinib in  
250 LNCaP-derived C4-2 cells, which were more suitable for these studies as they had stronger  
251 attachment to the culture plate. Similarly to LNCaP cells, treatment with erlotinib or lapatinib for  
252 4 hours under conditions used for the Seahorse assays decreased MCL1 in C4-2 cells (Figure  
253 4F). We then treated with erlotinib or lapatinib for 2 hours and assessed oxygen consumption.  
254 Neither erlotinib nor lapatinib changed maximal oxygen consumption rate (Figure 4G, H),  
255 suggesting that EGFR inhibition is not promoting functional damage to mitochondria regarding  
256 ATP production. Intriguingly, erlotinib and lapatinib increased basal oxygen consumption (ATP  
257 linked respiration) (Fig. 4G, I), indicating a shift from fermentation to increased oxidative  
258 phosphorylation. The precise basis for this metabolic adaptation, and whether it is linked to  
259 activation of a stress response, is not clear. In any case, these findings indicate that MARCH5 is

260 not altered in response to erlotinib, and that its increased degradation of MCL1 is driven  
261 primarily by the increase in NOXA.

262

263 **Mitochondria-targeted agents can increase MCL1 degradation by MARCH5-dependent**  
264 **mechanism**

265 MARCH5 regulates mitochondrial fission and fusion in response to mitochondrial stress (33-37),  
266 suggesting that agents that alter mitochondria functions may enhance MARCH5-mediated  
267 degradation of MCL1 by a distinct mechanism. To assess this hypothesis, we examined the  
268 effects of a series of mitochondria-targeted agents on MCL1. Actinonin is an inhibitor of the  
269 human mitochondrial peptide deformylase that blocks mitochondrial protein translation (52).  
270 Four-hour treatment with actinonin decreased MCL1 in LNCaP cells (Figure 5A). However, it  
271 also increased NOXA, suggesting that it may be acting similarly to tyrosine kinase inhibitors  
272 through an ISR, rather than by directly through MARCH5. Gamitrinib-TPP is a mitochondrial  
273 HSP90 inhibitor and can induce MCL1 degradation in glioblastoma cells (53). Consistent with  
274 previous data (54,55), gamitrinib-TPP rapidly decreased MCL1 in LNCaP cells, and this was  
275 also associated with an increase in NOXA (Figure 5B). The pyruvate dehydrogenase/ $\alpha$ -  
276 ketoglutarate dehydrogenase inhibitor CPI-613 is another clinically promising agent that targets  
277 mitochondria (56). Similar to actinonin and gamitrinib-TPP, treatment with CPI-613 decreased  
278 MCL1 and also increased NOXA (Figure 5C).

279 Significantly, each of these mitochondria-targeted agents increased ATF4 (Figure 5C),  
280 indicating an ISR mechanism for increasing NOXA. Consistent with this finding, and with a  
281 previous report on gamitrinib-TPP (54), treatment with ISRIB impaired the upregulation of  
282 ATF4 and NOXA, and the reduction of MCL1, by each of these mitochondria-targeted agents  
283 (Figure 5C). Moreover, depleting NOXA with siRNA prevented the decrease in MCL1 in  
284 response to each of these agents (Figure 5D). Together these findings indicated that the increased  
285 MCL1 degradation in response to these agents was being driven by increased NOXA  
286 downstream of an ISR.

287 As further evidence for this conclusion, we found that the decrease in MCL1 by these  
288 mitochondria-targeted agents was proteasome-dependent, and was not associated with an  
289 increase in p53 (Figure 5E, F). Finally, we used a caspase inhibitor to confirm that these  
290 mitochondrial-targeted agents were not increasing MCL1 degradation through release and

291 activation of caspases, which can degrade MCL1 (Figure 5F, Figure S4A). As a positive control  
292 for caspase inhibition, we showed that Z-DEVD-FMK could prevent caspase cleavage in  
293 response to erlotinib in combination with ABT-737 (Figure 5F, Figure S4A).

294 We next used siRNA to determine whether MCL1 degradation in response to these  
295 mitochondrial-targeted agents was mediated by MARCH5. Depleting MARCH5 markedly  
296 increased MCL1 and prevented the MCL1 loss in response to erlotinib and actinonin, although  
297 the effects of gamitrinib-TPP and CPI-613 were only partially suppressed, suggesting other  
298 ubiquitin ligases may contribute to this MCL1 degradation and partially compensate for the loss  
299 of MARCH5 (Figure 5G). Indeed, depletion of HUWE1 (which more modestly increased  
300 MCL1) partially impaired the effects of CPI-613 (Figure 5H). Finally, as expected and consistent  
301 with a previous study of gamitrinib-TPP (54), MCL1 degradation by actinonin in combination  
302 with BCLXL/BCL2 inhibition by ABT-263 caused dramatic apoptosis in LNCaP cells (Figure  
303 S4B). Overall, these results indicate that mitochondrial stress, similarly to kinase inhibitors,  
304 increases MCL1 degradation primarily through ISR mediated activation and NOXA dependent  
305 MARCH5-mediated ubiquitylation.

306

### 307 **MARCH5 genomic loss in PCa**

308 Consistent with its antiapoptotic and hence oncogenic function, the *MCL1* gene is frequently  
309 amplified in multiple cancers (~10% in the largest reported PCa dataset) (Figure 6A). To  
310 determine whether MARCH5 may have tumor suppressor functions in vivo, we examined  
311 whether it had genomic alterations in PCa. Deep deletions of *MARCH5* were identified in up to  
312 ~5% of PCa across a series of data sets (Figure 6B), and *MARCH5* deletions (either shallow or  
313 deep deletion) are associated with shorter progression free survival (Figure S5A). In contrast,  
314 *HUWE1* loss was very rare (Figure 6C). Interestingly, assessing genomic alterations across  
315 cancers, *MARCH5* loss appears to be most common in PCa (Figure 6D). Significantly, this may  
316 reflect its genomic location adjacent to *PTEN* at 10q23, and hence co-deletion with *PTEN*.  
317 Indeed, in the TCGA primary PCa dataset, all cases with deep deletion of *MARCH5* also have  
318 *PTEN* deletion (Figure 6E). In contrast, *MARCH5* deletion appears to be occurring independently  
319 of *PTEN* loss in a subset of metastatic PCa.

320 *MCL1* amplification and *MARCH5* loss generally occur in distinct tumors, although their  
321 mutual exclusivity is not statistically significant (Figure 6F and Figure S5B, C). Relative to

322 *MARCH5* and *MCL1*, oncogenic alterations in the genes encoding NOXA (*PMAIP1*) and BIM  
323 (*BCL2L11*) are rare (Figure 6F and Figure S5B, C). Finally, shallow deletions of *MARCH5*,  
324 suggesting single copy losses, appear to be relatively common in PCa, with a higher frequency in  
325 metastatic castration-resistant PCa versus primary PCa (Figure 6G, H, and Figure S5D, E).  
326 Together these results support a tumor suppressor function for *MARCH5*, which may be related  
327 to its negative regulation of *MCL1*.

328

### 329 ***MARCH5* loss decreases dependence on *MCL1***

330 The increased *MCL1* in *MARCH5* depleted cells suggested that these cells may have an  
331 increased dependence on *MCL1*. To assess effects of *MARCH5* loss on responses to *MCL1*  
332 antagonists, we treated parental versus *MARCH5* knockout cells with S63845. As expected, both  
333 NOXA and BIM were markedly increased in the *MARCH5* knockout cells (Figure 7A). S63845  
334 at the lowest concentration examined (1  $\mu$ M) both stabilized *MCL1* and decreased NOXA and  
335 BIM, consistent with S63845 binding to *MCL1* and displacing NOXA and BIM, and with their  
336 subsequent increased degradation. Surprisingly, despite the apparent substantial displacement of  
337 NOXA and BIM from *MCL1*, the increase in apoptosis (as assessed by cleaved caspase 3, CC3,  
338 and cleaved PARP, cPARP) was only observed at the highest concentration of drug (20  $\mu$ M).  
339 Identical results were obtained with a second *MCL1* antagonist (AZD5991) (Figure 7B). We also  
340 examined cells stably overexpressing ectopic *MCL1*. These cells similarly had marked increases  
341 in NOXA and BIM, which were decreased in response to 1  $\mu$ M S63845 (Figure 7C) or AZD5991  
342 (Figure 7D), but apoptotic responses again required high drug concentrations.

343 Although the *MARCH5* depleted and *MCL1* overexpressing cells showed increased  
344 apoptosis in response to *MCL1* antagonists, it was unclear why (if it was an on-target effect) it  
345 should require substantially higher drug concentrations than those needed for release of BIM and  
346 NOXA. One contributing factor may be that the BIM and NOXA that is displaced from *MCL1*  
347 by S63845 and AZD5991 appears to undergo rapid degradation, as their levels in the treated  
348 *MARCH5* depleted or *MCL1* overexpressing cells were not dramatically higher than in the  
349 parental control cells (Figure 7A-D). It is also possible that the high levels of NOXA and BIM in  
350 the *MARCH5* depleted cells and *MCL1* overexpressing cells were effectively competing with  
351 BAK for *MCL1* binding, so that these cells are less dependent on *MCL1* (and more dependent on  
352 other anti-apoptotic BCL2 family proteins) to buffer BAK. However, arguing against this

353 mechanism, by coimmunoprecipitation we found that MCL1 was binding increased levels of  
354 BAK, as well as NOXA and BIM, in the *MARCH5* depleted cells and the MCL1 overexpressing  
355 cells (Figure 7E). Alternatively, as MCL1 has a preference for binding BAK versus BAX (57), it  
356 is possible that the increased levels of MCL1 are adequate to neutralize BAK even at drug  
357 concentrations up to 10  $\mu$ M. In support of this latter mechanism, we found that BAK was not  
358 increased in the *MARCH5* knockout cells (Figure 7F), which may allow the high levels of MCL1  
359 to effectively buffer BAK despite treatment with S63845 or AZD5991.

360 In contrast to BAK, in the unactivated state BAX is localized primarily in the cytoplasm  
361 and may be buffered mostly by BCLXL and BCL2. Significantly, BAX protein expression was  
362 decreased in the *MARCH5* knockout cells (Figure 7F). The decrease in BAX after *MARCH5* loss  
363 (as well as the decrease in PUMA) suggested that the *MARCH5* knockout cells may have  
364 decreased capacity to buffer BAX and be very sensitive to acute increases in free BAX, and  
365 hence be more dependent on BCL2 or BCLXL. Therefore, we assessed responses to the  
366 BCL2/BCLXL antagonist ABT-263 (navitoclax). Significantly, ABT-263 treatment caused a  
367 marked apoptotic response specifically in the *MARCH5* knockout cells (Figure 7G). As we  
368 reported previously (22), ABT-263 could induce apoptosis in control parental cells in  
369 combination with S63845, but the addition of S63845 only minimally enhanced apoptosis in the  
370 ABT-263 treated *MARCH5* knockout cells (Figure 7H). The BCL2 specific antagonist ABT-199  
371 (venetoclax) was not effective, indicating that the efficacy of ABT-263 is due to BCLXL  
372 inhibition (Figure 7I).

373 Of note, a previous study similarly found that *MARCH5* knockdown could increase  
374 MCL1 and sensitize to BCLXL inhibition, and suggested that increased NOXA was suppressing  
375 the antiapoptotic activity of MCL1 (47). While this increased NOXA may be a factor, our data  
376 indicate that the increased MCL1 in *MARCH5* knockdown cells is sequestering substantial levels  
377 of both BAK and BIM (see Figure 7E). To explore other mechanisms, we examined the Avana  
378 CRISPR screen dataset through the Broad DepMap site (<https://depmap.org>) to identify cell lines  
379 that were dependent on *MARCH5* and genes that have most similar patterns of dependency (58).  
380 Interestingly, the gene that was most co-dependent with *MARCH5* was *MCL1* (Figure 7J,K).  
381 Conversely, the gene most co-dependent with MCL1 was *MARCH5*. This strong co-dependency  
382 was also observed in screens with another CRISPR library (Figure S6A, B, C). Based on these  
383 results and our data, we suggest that *MARCH5*, while acting as a ubiquitin ligase for NOXA-

384 liganded MCL1, may also have a distinct function in conjunction with MCL1 to suppress  
385 mitochondrial membrane permeabilization by BAX.

386

## 387 **Discussion**

388

389 We reported previously that treatment with several kinase inhibitors could markedly increase  
390 MCL1 degradation, and that this increase was not mediated by well-established MCL1 ubiquitin  
391 ligases including  $\beta$ TRCP, FBW7, HUWE1 (22). In this study we initially found that erlotinib  
392 treatment rapidly increased expression of NOXA, and that the increased MCL1 degradation was  
393 NOXA-dependent. We subsequently found that the increase in NOXA was driven by ISR  
394 activation, with subsequent increase in ATF4 protein and NOXA transcription. Previous studies  
395 have shown that NOXA binding can increase the degradation of MCL1 (39), and have  
396 implicated the ubiquitin ligases HUWE1 or PARKIN in this degradation (29,31,32,46).  
397 However, we identified the mitochondria-associated ubiquitin ligase MARCH5 as the primary  
398 mediator of this NOXA-dependent MCL1 degradation. Significantly, MARCH5 depletion both  
399 abrogated the decrease in MCL1 in response to erlotinib and substantially increased basal MCL1  
400 in multiple prostate, breast, and lung cancer cell lines, indicating that MARCH5 makes a major  
401 contribution to regulating basal levels of MCL1. The physiological significance of *MARCH5* as a  
402 tumor suppressor gene through regulation of MCL1 is further supported by its genomic loss in a  
403 subset of cancers. Importantly, MARCH5 depleted cells, which have increased levels of both  
404 MCL1 and NOXA, have increased sensitivity to MCL1 antagonists (although at high  
405 concentrations that may have off-target effects) and to the BH3 mimetic drug navitoclax (due to  
406 targeting BCLXL), suggesting therapeutic approaches for MARCH5 deficient tumors.

407 The ISR with increased translation of ATF4 can be driven by multiple stimuli that  
408 converge on phosphorylation of eIF2 $\alpha$ , with subsequent increased translation of ATF4 and  
409 increased expression of many genes that can contribute to resolving metabolic stress or driving  
410 apoptosis. Importantly, the precise downstream consequences of ISR activation are context  
411 dependent, but apoptosis is usually induced after prolonged stress and mediated by ATF4  
412 induction of CHOP (59,60). However, ATF4 has been reported to directly upregulate the  
413 *PMAIP1* gene (encoding NOXA) (41,43), which would be consistent with the rapid time course  
414 of NOXA induction that correlated with increased ATF4. The prominence of this ATF4



415 induction of NOXA in response to receptor tyrosine kinase inhibitors may reflect interactions  
416 between multiple pathways downstream of these receptors, although we cannot rule out off target  
417 effects on some ATP dependent processes. Indeed, treatment with erlotinib or lapatinib rapidly  
418 increased basal oxygen consumption, indicating a shift towards oxidative phosphorylation to  
419 increase ATP synthesis, and a metabolic stress that may contribute to ISR activation.

420 NOXA binding to MCL1 appears to stabilize a conformation that can drive its interaction  
421 with ubiquitin ligases including HUWE1 and, as shown in this study, with MARCH5 (29,30,61).  
422 Indeed, the finding that MARCH5 depletion prevented the degradation of MCL1 in response to  
423 NOXA induction indicates that MARCH5 is the major ubiquitin ligase mediating NOXA-  
424 induced MCL1 degradation. We further found that MARCH5 depletion increased MCL1 in  
425 multiple cell lines, indicating that MARCH5 plays a substantial role in regulating MCL1 under  
426 basal conditions, although this may still be NOXA-dependent and could reflect constitutive  
427 levels of stress in tumor cells. This latter result is consistent with previous data from two groups  
428 showing that that MARCH5 depletion can increase MCL1 (37,47). Interestingly, and consistent  
429 with the latter study, we found that MARCH5 depletion was associated with an increase in  
430 NOXA. This increase in NOXA was not due to increased p53-mediated transcription. Instead, it  
431 reflects NOXA stabilization by MCL1 binding, as NOXA levels decreased rapidly when NOXA  
432 was competed off with an MCL1 antagonist. However, we cannot rule out the possibility that  
433 MARCH5 also indirectly regulates NOXA levels by coupling the degradation of MCL1 in  
434 MCL1-NOXA complexes to the degradation of NOXA.

435 As MARCH5 is located on the mitochondrial outer membrane, we further asked whether  
436 its degradation of MCL1 might be enhanced by drugs that perturb mitochondrial function.  
437 Indeed, we found that all three agents examined (actinonin, gamitrinib-TPP, and CPI-613)  
438 caused a MARCH5-dependent increase in MCL1 degradation. However, this did not appear to  
439 reflect a direct effect on MARCH5. It was instead associated with a stress response, with  
440 increased ATF4 and NOXA, similarly to the response to kinase inhibitors. These findings are  
441 consistent with a previous study of gamitrinib-TPP that found this agent could activate a stress  
442 response with an increase in NOXA and decrease in MCL1 (54). Further studies are needed to  
443 determine whether MARCH5-mediated degradation of MCL1 can be enhanced by additional  
444 agents that alter mitochondrial function through alternative mechanisms.



445 MCL1 is an inhibitor of apoptosis that acts by neutralizing BAK/BAX and by  
446 sequestering activators of BAK/BAX such as BIM, and by also sequestering the less potent  
447 activators NOXA and PUMA. Therefore, we anticipated that cells expressing high levels of  
448 MCL1 due to MARCH5 depletion or overexpression of ectopic MCL1 would have increased  
449 dependence on MCL1 to neutralize BAK/BAX and sequester BIM, NOXA, and PUMA. Indeed,  
450 we confirmed that MCL1 was binding increased levels of these proteins in MARCH5 knockout  
451 and MCL1 overexpressing cells, and that MCL1 antagonists could induce apoptosis in the  
452 MARCH5 knockout and MCL1 overexpressing cells, but not the control cells. However, while  
453 the apparent release of BIM and NOXA from MCL1 and their subsequent degradation were  
454 observed at relatively low concentrations of S63845 or AZD5991, the induction of apoptosis  
455 required ~20  $\mu$ M of these drugs. This requirement for higher drug levels may reflect the very  
456 high levels of MCL1 and its subsequent persistent engagement of BAK, despite treatment with  
457 MCL1 antagonists.

458 The MARCH5 knockout cells also underwent apoptosis in response to BCLXL  
459 antagonism with ABT-263, while apoptosis in the parental cells required antagonism of both  
460 BCLXL and MCL1. A previous study similarly found that MARCH5 depletion could sensitize to  
461 ABT-263, and suggested it may be due to high levels of NOXA that are antagonizing the  
462 antiapoptotic functions of MCL1 (47). However, we found that MCL1 in MARCH5 knockout  
463 cells was binding increased BAK and BIM, as well NOXA. Alternatively, as suggested by our  
464 data, there may be a codependency between MARCH5 and MCL1 for buffering of BAX, so that  
465 BCLXL in the MARCH5 knockout cells becomes critical to suppress the activity of BAX.

466 While more studies are clearly needed to further define how *MARCH5* loss (or *MCL1*  
467 amplification) alters responsiveness to BH3 mimetics, this study indicates that *MARCH5* loss,  
468 which appears to be relatively common in PCa, confers vulnerabilities to BH3 mimetic drugs.  
469 However, challenges to exploiting these vulnerabilities include thrombocytopenia caused by  
470 BCLXL inhibition, and the possible requirement for high concentrations of MCL1 antagonists,  
471 whose toxicity profile remains to be established. Importantly, the available MCL1 antagonists  
472 are all noncovalent and stabilize MCL1, which may limit their ability to abrogate MCL1  
473 interaction with BAK. Therefore, it is possible that antagonists that drive MCL1 degradation,  
474 possibly by mimicking the NOXA BH3 domain, might be more potent and effective. Finally,

475 approaches that selectively cause robust ISR activation in tumor cells, with increased NOXA and  
476 MCL1 degradation, may create an exploitable therapeutic window for BCLXL antagonists.

477

## 478 **Methods**

479

### 480 **Cell culture**

481 LNCaP, C4-2, PC3 and RV1 cells were cultured in RPM1640 medium (#MT10040CV, Fisher  
482 Scientific) with 10% FBS (#26140079, Fisher Scientific) and penicillin-streptomycin (100  
483 IU/ml) (#15140122, Fisher Scientific). DU145, MDA-MB-468, MCF7, and A549 cells were  
484 cultured in DMEM medium (#MT10013CV, Fisher Scientific) with 10% FBS and penicillin-  
485 streptomycin (100 IU/ml). All cells were obtained from ATCC. Cell identity was confirmed by  
486 STR analysis, and Mycoplasma testing was negative. For most immunoblotting or quantitative  
487 RT-PCR experiments, cells were grown to around 50% confluence for 1 day and then treated  
488 with indicated drugs. Transient transfections for HA-tagged MARCH5 plasmid (#HG21559-NY,  
489 Sino Biological) were carried out using Lipofectamine 3000 (#L3000075, Fisher Scientific)  
490 following the manufacturer's instruction. Erlotinib (#S7786), lapatinib (#S2111), dinaciclib  
491 (#S2768), cabozantinib (#S1119), ABT-263 (#S1001), ABT-737 (#S1002), and ABT-199  
492 (#S8048) were from Selleck Chemicals. Gamitrinib-TPP was kindly provided by Dr. Dario  
493 Altieri (The Wistar Institute). AZD5991 was provided AstraZeneca. S63845 (#HY-100741),  
494 actinomycin D (#HY-17559), ISRIB trans-isomer (#HY-12495), MLN4924 (#HY-70062), MG-  
495 132 (#HY-13259), CPI-613 (#HY-15453), and Z-DEVD-FMK (#HY-12466) were from  
496 MedChem Express. MG-115 (#C6706), actinonin (#A6671), and epidermal growth factor (EGF)  
497 (#E9644) were from Sigma-Aldrich.

498

### 499 **Immunoblotting**

500 Cells were lysed in RIPA buffer (#PI89900, Fisher Scientific) supplemented with protease  
501 inhibitor (#PI78437, Fisher Scientific) and phosphatase inhibitor cocktails (#PI78426, Fisher  
502 Scientific). Blots were incubated with rabbit anti-ATF4 (rabbit, 1:2000) (#ab184909, Abcam),  
503 anti-Bad (rabbit, 1:500) (#9239, Cell Signaling Technology), anti-BAK (rabbit, 1:1000) (#12105,  
504 Cell Signaling Technology), anti-BAX (rabbit, 1:1000) (#5023, Cell Signaling Technology),  
505 anti- $\beta$ -actin (mouse, 1:10000) (#ab6276, Abcam), anti-BCL2 (rabbit, 1:500) (#4223, Cell

506 Signaling Technology), anti-BCLXL (rabbit, 1:1000) (#2764, Cell Signaling Technology), anti-  
507 BIM (rabbit, 1:1000) (#2933, Cell Signaling Technology), anti-BIM (mouse, 1:500) (#sc-  
508 374358, Santa Cruz Biotechnology), anti-cleaved caspase 3 (CC3) (rabbit, 1:250) (#9664, Cell  
509 Signaling Technology), anti-FUNDC1 (rabbit, 1:1000) (#PA5-48853, Fisher Scientific), anti-HA  
510 (rabbit, 1:1000) (#3724, Cell Signaling Technology), anti-MARCH5 (rabbit, 1:2000) (#06-1036,  
511 EMD Millipore), anti-MCL1 (rabbit, 1:1000) (#5453, Cell Signaling Technology), anti-MCL1  
512 (mouse, 1:1000) (#sc-12756, Santa Cruz Biotechnology), anti-Mfn1 (mouse, 1:1000) (#sc-  
513 166644, Santa Cruz Biotechnology), anti-MiD49 (SMCR7) (rabbit, 1:1000) (#SAB2700654,  
514 Sigma Aldrich), anti-MULE (HUWE1) (mouse, 1:500) (#5695, Cell Signaling Technology),  
515 anti-NOXA (mouse, 1:250) (#ab13654, Abcam), anti-p27 (rabbit, 1:1000) (#3686, Cell Signaling  
516 Technology), anti-p53 (mouse, 1:1000) (#sc-126, Santa Cruz Biotechnology), anti-p62 (rabbit,  
517 1:1000) (#5114, Cell Signaling Technology), anti-PARP (rabbit, 1:1000) (#9532, Cell Signaling  
518 Technology), anti-phospho-eIF2 $\alpha$  Ser51 (rabbit, 1:1000) (#9721, Cell Signaling Technology),  
519 anti-PUMA (rabbit, 1:500) (#12450, Cell Signaling Technology), or anti-vinculin (mouse,  
520 1:20000) (#sc-73614, Santa Cruz Biotechnology), and then with 1:5000 of anti-rabbit (#W401B)  
521 or anti-mouse (#W402B) secondary antibodies (Promega).

522

### 523 **RT-PCR**

524 Quantitative real-time RT-PCR (qRT-PCR) amplification was performed on RNA extracted from  
525 cells using RNeasy Mini kit (#74104, Qiagen). RNA (50 ng) was used for each reaction, and the  
526 results were normalized by co-amplification of *18S ribosomal RNA (rRNA)* or *GAPDH*.

527 Reactions were performed on an ABI Prism 7700 Sequence Detection System (Thermo Fisher  
528 Scientific) using TaqMan one-step RT-PCR reagents (#4444434, Fisher Scientific). Primer mix  
529 for *MARCH5* (Hs00215155\_m1), *MCL1* (Hs01050896\_m1), *NOXA (PMAIP)* (Hs00560402\_m1),  
530 *18S rRNA* (#4319413E), and *GAPDH* (#4326317E) was purchased from Thermo Fisher  
531 Scientific.

532

### 533 **RNA interference**

534 For transient silencing of target genes, cells were transfected with pooled Bim siRNAs (#L-  
535 004383-00-0005, Dharmacon), an individual *MARCH5* siRNA (#s29332, Fisher), pooled  
536 *MARCH5* siRNAs (#L-007001-00-0005, Dharmacon), pooled *MULE (HUWE1)* siRNAs (#L-

537 007185-00-0005, Dharmacon), pooled NOXA siRNAs (#L-005275-00-0005, Dharmacon), three  
538 NOXA individual siRNAs (#s10708-10710, Thermo Fisher Scientific), or control non-target  
539 siRNA (#D-001810-01-05, Dharmacon) using Lipofectamine RNAiMAX (#13778150, Fisher  
540 Scientific) following the manufacturer's instruction. These transfected cells were then analyzed  
541 48-72 hours later.

542

#### 543 **Generation of cell line stably overexpressing HA-MCL1**

544 LNCaP cells stably overexpressing HA-tagged MCL1 were previously generated (22). Briefly,  
545 LNCaP cells were transfected with HA-MCL1 (kindly provided by Dr. Wenyi Wei, BIDMC)  
546 using Lipofectamine 3000 and then selected with 750 µg/ml of G418 for two weeks.

547

#### 548 **Generation of MARCH5 or MCL1 knockout cell line**

549 LNCaP cells were co-transfected with MARCH5 CRISPR/Cas9 knockout (KO) plasmid (pool of  
550 3 guide RNAs) (#sc-404655) and MARCH5 HDR plasmid (#sc-404655-HDR) at a ratio of 1:1  
551 using Lipofectamine 3000. Cells were then selected with 2 µg/ml of puromycin for two weeks.  
552 The selective medium was replaced every 2-3 days. The single clones were picked and checked  
553 for MARCH5 expression. Control CRISPR/Cas9 plasmid (sc-418922) was used as a negative  
554 control. MCL1-KO LNCaP cells were previously generated (22) using MCL1 CRISPR/CAS9  
555 KO plasmid (#sc-400079) and MCL1 HDR plasmid (#sc-400079-HDR). All plasmids were from  
556 Santa Cruz Biotechnology.

557

#### 558 **Coimmunoprecipitation (Co-IP)**

559 Control, MARCH5-KO, or HA-MCL1 LNCaP cells were treated with or without indicated drugs  
560 and were lysed in IP lysis buffer (#87788, Fisher Scientific) supplemented with protease and  
561 phosphatase inhibitor cocktails. The cell lysates were immunopurified with anti-MARCH5  
562 rabbit, anti-MCL1 rabbit, anti-MCL1 mouse antibody, or control rabbit or mouse IgG overnight,  
563 and then were incubated with protein A or G agarose beads for 2 hours. The beads were washed  
564 five times with IP lysis buffer and were boiled for 5-10 min in 2 times Laemmli sample buffer  
565 (#1610737, Bio-Rad) with 2-mercaptoethanol (#BP176-100, Fisher Scientific). After  
566 centrifugation, the supernatants were immunoblotted for indicated proteins.

567

568 **Analysis of protein phosphorylation status**

569 MARCH5-KO or control LNCaP cells were seeded in 10% FBS or 5% Charcoal Stripped Serum  
570 (CSS) medium for 1 day. These cells were treated with erlotinib for 3 hours or EGF for 30 min  
571 and were lysed in RIPA buffer supplemented with protease and phosphatase inhibitor cocktails.  
572 The cell lysates were immediately boiled for 5 min in laemmli sample buffer with 2-  
573 mercaptoethanol and were applied to SuperSep Phos-tag gel (#198-17981, FUJIFILM WAKO  
574 Chemicals), followed by immunoblotting for indicated proteins.

575

576 **Seahorse analysis**

577 C4-2 cells were seeded in 96-well plate in 10% FBS medium for 1 day. The medium was  
578 changed to Seahorse XF medium (#103576-100, Agilent Technologies) supplemented with 10  
579 mM glucose (#103577-100, Agilent Technologies), 1 mM pyruvate (#103578-100, Agilent  
580 Technologies) and 2 mM glutamine (#103579-100, Agilent Technologies) before analysis. Real-  
581 time oxygen consumption rate (OCR) of these cells was measured using the Seahorse  
582 Extracellular Flux (XFe-96) analyzer (Agilent Technologies). Protein concentration of cells in  
583 each well was determined, and OCR value was normalized to  $\mu\text{g}/\text{protein}$ .

584

585 **Statistical analysis**

586 Significance of difference between 2 groups was determined by 2-tailed Student's t test using R  
587 software (version 3.3.2). Statistical significance was accepted at  $p < 0.05$ .

588

589 **Acknowledgments:** We thanks Drs. Dario Altieri and Wenyi Wei for reagents, Dr. Mariusz

590 Karbowski for helpful discussions, Dr. Xiaowen Liu for assistance with Seahorse studies, and

591 Balk lab members for feedback.

592

593 **Conflict of Interest:** The authors declare no potential conflicts of interest.

594

595 **Funding:** This work was supported by NIH grants P01 CA163227 (SPB), P50 CA090381 (SPB),  
596 and a Research Fellowship from Gunma University Hospital (SA).

597  
598 **Author contributions:** SA, SC, LX, and SPB were responsible for the experimental design and  
599 data interpretation. SA, SC, and LX carried out the experiments. SA and SPB were responsible  
600 for the manuscript preparation.

601

## 602 **References**

- 603 1. Watson PA, Arora VK, Sawyers CL. Emerging mechanisms of resistance to androgen  
604 receptor inhibitors in prostate cancer. *Nat Rev Cancer* **2015**;15(12):701-11 doi  
605 10.1038/nrc4016.
- 606 2. Yuan X, Cai C, Chen S, Chen S, Yu Z, Balk SP. Androgen receptor functions in  
607 castration-resistant prostate cancer and mechanisms of resistance to new agents targeting  
608 the androgen axis. *Oncogene* **2014**;33(22):2815-25 doi 10.1038/onc.2013.235.
- 609 3. Montero J, Letai A. Why do BCL-2 inhibitors work and where should we use them in the  
610 clinic? *Cell Death Differ* **2018**;25(1):56-64 doi 10.1038/cdd.2017.183.
- 611 4. Merino D, Kelly GL, Lessene G, Wei AH, Roberts AW, Strasser A. BH3-Mimetic  
612 Drugs: Blazing the Trail for New Cancer Medicines. *Cancer Cell* **2018**;34(6):879-91 doi  
613 10.1016/j.ccell.2018.11.004.
- 614 5. Knight T, Luedtke D, Edwards H, Taub JW, Ge Y. A delicate balance - The BCL-2  
615 family and its role in apoptosis, oncogenesis, and cancer therapeutics. *Biochem*  
616 *Pharmacol* **2019** doi 10.1016/j.bcp.2019.01.015.
- 617 6. Oltersdorf T, Elmore SW, Shoemaker AR, Armstrong RC, Augeri DJ, Belli BA, *et al.* An  
618 inhibitor of Bcl-2 family proteins induces regression of solid tumours. *Nature*  
619 **2005**;435(7042):677-81 doi 10.1038/nature03579.
- 620 7. Tse C, Shoemaker AR, Adickes J, Anderson MG, Chen J, Jin S, *et al.* ABT-263: a potent  
621 and orally bioavailable Bcl-2 family inhibitor. *Cancer Res* **2008**;68(9):3421-8 doi  
622 10.1158/0008-5472.CAN-07-5836.
- 623 8. Roberts AW, Seymour JF, Brown JR, Wierda WG, Kipps TJ, Khaw SL, *et al.* Substantial  
624 susceptibility of chronic lymphocytic leukemia to BCL2 inhibition: results of a phase I  
625 study of navitoclax in patients with relapsed or refractory disease. *J Clin Oncol*  
626 **2012**;30(5):488-96 doi 10.1200/JCO.2011.34.7898.
- 627 9. Pan R, Hogdal LJ, Benito JM, Bucci D, Han L, Borthakur G, *et al.* Selective BCL-2  
628 inhibition by ABT-199 causes on-target cell death in acute myeloid leukemia. *Cancer*  
629 *Discov* **2014**;4(3):362-75 doi 10.1158/2159-8290.CD-13-0609.
- 630 10. Roberts AW, Davids MS, Pagel JM, Kahl BS, Puvvada SD, Gerecitano JF, *et al.*  
631 Targeting BCL2 with Venetoclax in Relapsed Chronic Lymphocytic Leukemia. *N Engl J*  
632 *Med* **2016**;374(4):311-22 doi 10.1056/NEJMoa1513257.
- 633 11. Faber AC, Farago AF, Costa C, Dastur A, Gomez-Caraballo M, Robbins R, *et al.*  
634 Assessment of ABT-263 activity across a cancer cell line collection leads to a potent



- 635 combination therapy for small-cell lung cancer. *Proc Natl Acad Sci U S A*  
636 **2015**;112(11):E1288-96 doi 10.1073/pnas.1411848112.
- 637 12. van Delft MF, Wei AH, Mason KD, Vandenberg CJ, Chen L, Czabotar PE, *et al.* The  
638 BH3 mimetic ABT-737 targets selective Bcl-2 proteins and efficiently induces apoptosis  
639 via Bak/Bax if Mcl-1 is neutralized. *Cancer Cell* **2006**;10(5):389-99 doi  
640 10.1016/j.ccr.2006.08.027.
- 641 13. Konopleva M, Contractor R, Tsao T, Samudio I, Ruvolo PP, Kitada S, *et al.* Mechanisms  
642 of apoptosis sensitivity and resistance to the BH3 mimetic ABT-737 in acute myeloid  
643 leukemia. *Cancer Cell* **2006**;10(5):375-88 doi 10.1016/j.ccr.2006.10.006.
- 644 14. Santer FR, Erb HH, Oh SJ, Handle F, Feiersinger GE, Luef B, *et al.* Mechanistic  
645 rationale for MCL1 inhibition during androgen deprivation therapy. *Oncotarget*  
646 **2015**;6(8):6105-22 doi 10.18632/oncotarget.3368.
- 647 15. Williams MM, Lee L, Hicks DJ, Joly MM, Elion D, Rahman B, *et al.* Key Survival  
648 Factor, Mcl-1, Correlates with Sensitivity to Combined Bcl-2/Bcl-xL Blockade. *Mol*  
649 *Cancer Res* **2017**;15(3):259-68 doi 10.1158/1541-7786.MCR-16-0280-T.
- 650 16. Xiao Y, Nimmer P, Sheppard GS, Bruncko M, Hessler P, Lu X, *et al.* MCL-1 Is a Key  
651 Determinant of Breast Cancer Cell Survival: Validation of MCL-1 Dependency Utilizing  
652 a Highly Selective Small Molecule Inhibitor. *Mol Cancer Ther* **2015**;14(8):1837-47 doi  
653 10.1158/1535-7163.MCT-14-0928.
- 654 17. Levenson JD, Zhang H, Chen J, Tahir SK, Phillips DC, Xue J, *et al.* Potent and selective  
655 small-molecule MCL-1 inhibitors demonstrate on-target cancer cell killing activity as  
656 single agents and in combination with ABT-263 (navitoclax). *Cell Death Dis*  
657 **2015**;6:e1590 doi 10.1038/cddis.2014.561.
- 658 18. Chen J, Jin S, Abraham V, Huang X, Liu B, Mitten MJ, *et al.* The Bcl-2/Bcl-X(L)/Bcl-w  
659 inhibitor, navitoclax, enhances the activity of chemotherapeutic agents in vitro and in  
660 vivo. *Mol Cancer Ther* **2011**;10(12):2340-9 doi 10.1158/1535-7163.MCT-11-0415.
- 661 19. Modugno M, Banfi P, Gasparri F, Borzilleri R, Carter P, Cornelius L, *et al.* Mcl-1  
662 antagonism is a potential therapeutic strategy in a subset of solid cancers. *Exp Cell Res*  
663 **2015**;332(2):267-77 doi 10.1016/j.yexcr.2014.11.022.
- 664 20. Anderson GR, Wardell SE, Cakir M, Crawford L, Leeds JC, Nussbaum DP, *et al.*  
665 PIK3CA mutations enable targeting of a breast tumor dependency through mTOR-  
666 mediated MCL-1 translation. *Sci Transl Med* **2016**;8(369):369ra175 doi  
667 10.1126/scitranslmed.aae0348.
- 668 21. Tong J, Wang P, Tan S, Chen D, Nikolovska-Coleska Z, Zou F, *et al.* Mcl-1 Degradation  
669 Is Required for Targeted Therapeutics to Eradicate Colon Cancer Cells. *Cancer Res*  
670 **2017**;77(9):2512-21 doi 10.1158/0008-5472.CAN-16-3242.
- 671 22. Arai S, Jonas O, Whitman MA, Corey E, Balk SP, Chen S. Tyrosine Kinase Inhibitors  
672 Increase MCL1 Degradation and in Combination with BCLXL/BCL2 Inhibitors Drive  
673 Prostate Cancer Apoptosis. *Clin Cancer Res* **2018**;24(21):5458-70 doi 10.1158/1078-  
674 0432.CCR-18-0549.



- 675 23. Kotschy A, Szlavik Z, Murray J, Davidson J, Maragno AL, Le Toumelin-Braizat G, *et al.*  
676 The MCL1 inhibitor S63845 is tolerable and effective in diverse cancer models. *Nature*  
677 **2016**;538(7626):477-82 doi 10.1038/nature19830.
- 678 24. Ashkenazi A, Fairbrother WJ, Levenson JD, Souers AJ. From basic apoptosis discoveries  
679 to advanced selective BCL-2 family inhibitors. *Nat Rev Drug Discov* **2017**;16(4):273-84  
680 doi 10.1038/nrd.2016.253.
- 681 25. Letai A. S63845, an MCL-1 Selective BH3 Mimetic: Another Arrow in Our Quiver.  
682 *Cancer Cell* **2016**;30(6):834-5 doi 10.1016/j.ccell.2016.11.016.
- 683 26. Merino D, Whittle JR, Vaillant F, Serrano A, Gong JN, Giner G, *et al.* Synergistic action  
684 of the MCL-1 inhibitor S63845 with current therapies in preclinical models of triple-  
685 negative and HER2-amplified breast cancer. *Sci Transl Med* **2017**;9(401) doi  
686 10.1126/scitranslmed.aam7049.
- 687 27. Tron AE, Belmonte MA, Adam A, Aquila BM, Boise LH, Chiarparin E, *et al.* Discovery  
688 of Mcl-1-specific inhibitor AZD5991 and preclinical activity in multiple myeloma and  
689 acute myeloid leukemia. *Nat Commun* **2018**;9(1):5341 doi 10.1038/s41467-018-07551-  
690 w.
- 691 28. Caenepeel S, Brown SP, Belmontes B, Moody G, Keegan KS, Chui D, *et al.* AMG 176, a  
692 Selective MCL1 Inhibitor, Is Effective in Hematologic Cancer Models Alone and in  
693 Combination with Established Therapies. *Cancer Discov* **2018**;8(12):1582-97 doi  
694 10.1158/2159-8290.CD-18-0387.
- 695 29. Gomez-Bougie P, Menoret E, Juin P, Dousset C, Pellat-Deceunynck C, Amiot M. Noxa  
696 controls Mule-dependent Mcl-1 ubiquitination through the regulation of the Mcl-  
697 1/USP9X interaction. *Biochem Biophys Res Commun* **2011**;413(3):460-4 doi  
698 10.1016/j.bbrc.2011.08.118.
- 699 30. Guikema JE, Amiot M, Eldering E. Exploiting the pro-apoptotic function of NOXA as a  
700 therapeutic modality in cancer. *Expert Opin Ther Targets* **2017**;21(8):767-79 doi  
701 10.1080/14728222.2017.1349754.
- 702 31. Zhong Q, Gao W, Du F, Wang X. Mule/ARF-BP1, a BH3-only E3 ubiquitin ligase,  
703 catalyzes the polyubiquitination of Mcl-1 and regulates apoptosis. *Cell*  
704 **2005**;121(7):1085-95 doi 10.1016/j.cell.2005.06.009.
- 705 32. Warr MR, Acoca S, Liu Z, Germain M, Watson M, Blanchette M, *et al.* BH3-ligand  
706 regulates access of MCL-1 to its E3 ligase. *FEBS Lett* **2005**;579(25):5603-8 doi  
707 10.1016/j.febslet.2005.09.028.
- 708 33. Chen Z, Liu L, Cheng Q, Li Y, Wu H, Zhang W, *et al.* Mitochondrial E3 ligase  
709 MARCH5 regulates FUNDC1 to fine-tune hypoxic mitophagy. *EMBO Rep*  
710 **2017**;18(3):495-509 doi 10.15252/embr.201643309.
- 711 34. Park YY, Nguyen OT, Kang H, Cho H. MARCH5-mediated quality control on acetylated  
712 Mfn1 facilitates mitochondrial homeostasis and cell survival. *Cell Death Dis*  
713 **2014**;5:e1172 doi 10.1038/cddis.2014.142.

- 714 35. Yonashiro R, Ishido S, Kyo S, Fukuda T, Goto E, Matsuki Y, *et al.* A novel  
715 mitochondrial ubiquitin ligase plays a critical role in mitochondrial dynamics. *EMBO J*  
716 **2006**;25(15):3618-26 doi 10.1038/sj.emboj.7601249.
- 717 36. Xu S, Cherok E, Das S, Li S, Roelofs BA, Ge SX, *et al.* Mitochondrial E3 ubiquitin  
718 ligase MARCH5 controls mitochondrial fission and cell sensitivity to stress-induced  
719 apoptosis through regulation of MiD49 protein. *Mol Biol Cell* **2016**;27(2):349-59 doi  
720 10.1091/mbc.E15-09-0678.
- 721 37. Cherok E, Xu S, Li S, Das S, Meltzer WA, Zalzman M, *et al.* Novel regulatory roles of  
722 Mff and Drp1 in E3 ubiquitin ligase MARCH5-dependent degradation of MiD49 and  
723 Mcl1 and control of mitochondrial dynamics. *Mol Biol Cell* **2017**;28(3):396-410 doi  
724 10.1091/mbc.E16-04-0208.
- 725 38. Willis SN, Chen L, Dewson G, Wei A, Naik E, Fletcher JI, *et al.* Proapoptotic Bak is  
726 sequestered by Mcl-1 and Bcl-xL, but not Bcl-2, until displaced by BH3-only proteins.  
727 *Genes Dev* **2005**;19(11):1294-305 doi 10.1101/gad.1304105.
- 728 39. Czabotar PE, Lee EF, van Delft MF, Day CL, Smith BJ, Huang DC, *et al.* Structural  
729 insights into the degradation of Mcl-1 induced by BH3 domains. *Proc Natl Acad Sci U S*  
730 *A* **2007**;104(15):6217-22 doi 10.1073/pnas.0701297104.
- 731 40. Pakos-Zebrucka K, Koryga I, Mnich K, Ljubic M, Samali A, Gorman AM. The integrated  
732 stress response. *EMBO Rep* **2016**;17(10):1374-95 doi 10.15252/embr.201642195.
- 733 41. Armstrong JL, Flockhart R, Veal GJ, Lovat PE, Redfern CP. Regulation of endoplasmic  
734 reticulum stress-induced cell death by ATF4 in neuroectodermal tumor cells. *J Biol*  
735 *Chem* **2010**;285(9):6091-100 doi 10.1074/jbc.M109.014092.
- 736 42. Albershardt TC, Salerni BL, Soderquist RS, Bates DJ, Pletnev AA, Kisselev AF, *et al.*  
737 Multiple BH3 mimetics antagonize antiapoptotic MCL1 protein by inducing the  
738 endoplasmic reticulum stress response and up-regulating BH3-only protein NOXA. *J*  
739 *Biol Chem* **2011**;286(28):24882-95 doi 10.1074/jbc.M111.255828.
- 740 43. Wang Q, Mora-Jensen H, Weniger MA, Perez-Galan P, Wolford C, Hai T, *et al.* ERAD  
741 inhibitors integrate ER stress with an epigenetic mechanism to activate BH3-only protein  
742 NOXA in cancer cells. *Proc Natl Acad Sci U S A* **2009**;106(7):2200-5 doi  
743 10.1073/pnas.0807611106.
- 744 44. Sidrauski C, Acosta-Alvear D, Khoutorsky A, Vedantham P, Hearn BR, Li H, *et al.*  
745 Pharmacological brake-release of mRNA translation enhances cognitive memory. *Elife*  
746 **2013**;2:e00498 doi 10.7554/eLife.00498.
- 747 45. Zhou W, Xu J, Li H, Xu M, Chen ZJ, Wei W, *et al.* Neddylation E2 UBE2F Promotes the  
748 Survival of Lung Cancer Cells by Activating CRL5 to Degrade NOXA via the K11  
749 Linkage. *Clin Cancer Res* **2017**;23(4):1104-16 doi 10.1158/1078-0432.CCR-16-1585.
- 750 46. Carroll RG, Hollville E, Martin SJ. Parkin sensitizes toward apoptosis induced by  
751 mitochondrial depolarization through promoting degradation of Mcl-1. *Cell reports*  
752 **2014**;9(4):1538-53 doi 10.1016/j.celrep.2014.10.046.

- 753 47. Subramanian A, Andronache A, Li YC, Wade M. Inhibition of MARCH5 ubiquitin ligase  
754 abrogates MCL1-dependent resistance to BH3 mimetics via NOXA. *Oncotarget*  
755 **2016**;7(13):15986-6002 doi 10.18632/oncotarget.7558.
- 756 48. Craxton A, Butterworth M, Harper N, Fairall L, Schwabe J, Ciechanover A, *et al.*  
757 NOXA, a sensor of proteasome integrity, is degraded by 26S proteasomes by an  
758 ubiquitin-independent pathway that is blocked by MCL-1. *Cell Death Differ*  
759 **2012**;19(9):1424-34 doi 10.1038/cdd.2012.16.
- 760 49. Tong J, Zheng X, Tan X, Fletcher R, Nikolovska-Coleska Z, Yu J, *et al.* Mcl-1  
761 Phosphorylation without Degradation Mediates Sensitivity to HDAC Inhibitors by  
762 Liberating BH3-Only Proteins. *Cancer Res* **2018**;78(16):4704-15 doi 10.1158/0008-  
763 5472.CAN-18-0399.
- 764 50. Ewings KE, Hadfield-Moorhouse K, Wiggins CM, Wickenden JA, Balmanno K, Gilley  
765 R, *et al.* ERK1/2-dependent phosphorylation of BimEL promotes its rapid dissociation  
766 from Mcl-1 and Bcl-xL. *EMBO J* **2007**;26(12):2856-67 doi 10.1038/sj.emboj.7601723.
- 767 51. Conage-Pough JE, Boise LH. Phosphorylation alters Bim-mediated Mcl-1 stabilization  
768 and priming. *FEBS J* **2018**;285(14):2626-40 doi 10.1111/febs.14505.
- 769 52. Escobar-Alvarez S, Gardner J, Sheth A, Manfredi G, Yang G, Ouerfelli O, *et al.*  
770 Inhibition of human peptide deformylase disrupts mitochondrial function. *Mol Cell Biol*  
771 **2010**;30(21):5099-109 doi 10.1128/MCB.00469-10.
- 772 53. Kang BH, Siegelin MD, Plescia J, Raskett CM, Garlick DS, Dohi T, *et al.* Preclinical  
773 characterization of mitochondria-targeted small molecule hsp90 inhibitors, gamitrinibs, in  
774 advanced prostate cancer. *Clin Cancer Res* **2010**;16(19):4779-88 doi 10.1158/1078-  
775 0432.CCR-10-1818.
- 776 54. Karpel-Massler G, Ishida CT, Bianchetti E, Shu C, Perez-Lorenzo R, Horst B, *et al.*  
777 Inhibition of Mitochondrial Matrix Chaperones and Antiapoptotic Bcl-2 Family Proteins  
778 Empower Antitumor Therapeutic Responses. *Cancer Res* **2017**;77(13):3513-26 doi  
779 10.1158/0008-5472.CAN-16-3424.
- 780 55. Ishida CT, Shu C, Halatsch ME, Westhoff MA, Altieri DC, Karpel-Massler G, *et al.*  
781 Mitochondrial matrix chaperone and c-myc inhibition causes enhanced lethality in  
782 glioblastoma. *Oncotarget* **2017**;8(23):37140-53 doi 10.18632/oncotarget.16202.
- 783 56. Pardee TS, Lee K, Luddy J, Maturo C, Rodriguez R, Isom S, *et al.* A phase I study of the  
784 first-in-class antimitochondrial metabolism agent, CPI-613, in patients with advanced  
785 hematologic malignancies. *Clin Cancer Res* **2014**;20(20):5255-64 doi 10.1158/1078-  
786 0432.CCR-14-1019.
- 787 57. Llambi F, Moldoveanu T, Tait SW, Bouchier-Hayes L, Temirov J, McCormick LL, *et al.*  
788 A unified model of mammalian BCL-2 protein family interactions at the mitochondria.  
789 *Mol Cell* **2011**;44(4):517-31 doi 10.1016/j.molcel.2011.10.001.
- 790 58. Meyers RM, Bryan JG, McFarland JM, Weir BA, Sizemore AE, Xu H, *et al.*  
791 Computational correction of copy number effect improves specificity of CRISPR-Cas9  
792 essentiality screens in cancer cells. *Nat Genet* **2017**;49(12):1779-84 doi 10.1038/ng.3984.

- 793 59. Corazzari M, Gagliardi M, Fimia GM, Piacentini M. Endoplasmic Reticulum Stress,  
794 Unfolded Protein Response, and Cancer Cell Fate. *Front Oncol* **2017**;7:78 doi  
795 10.3389/fonc.2017.00078.
- 796 60. Iurlaro R, Munoz-Pinedo C. Cell death induced by endoplasmic reticulum stress. *FEBS J*  
797 **2016**;283(14):2640-52 doi 10.1111/febs.13598.
- 798 61. Song T, Wang Z, Ji F, Feng Y, Fan Y, Chai G, *et al.* Deactivation of Mcl-1 by Dual-  
799 Function Small-Molecule Inhibitors Targeting the Bcl-2 Homology 3 Domain and  
800 Facilitating Mcl-1 Ubiquitination. *Angew Chem Int Ed Engl* **2016**;55(46):14250-6 doi  
801 10.1002/anie.201606543.
- 802



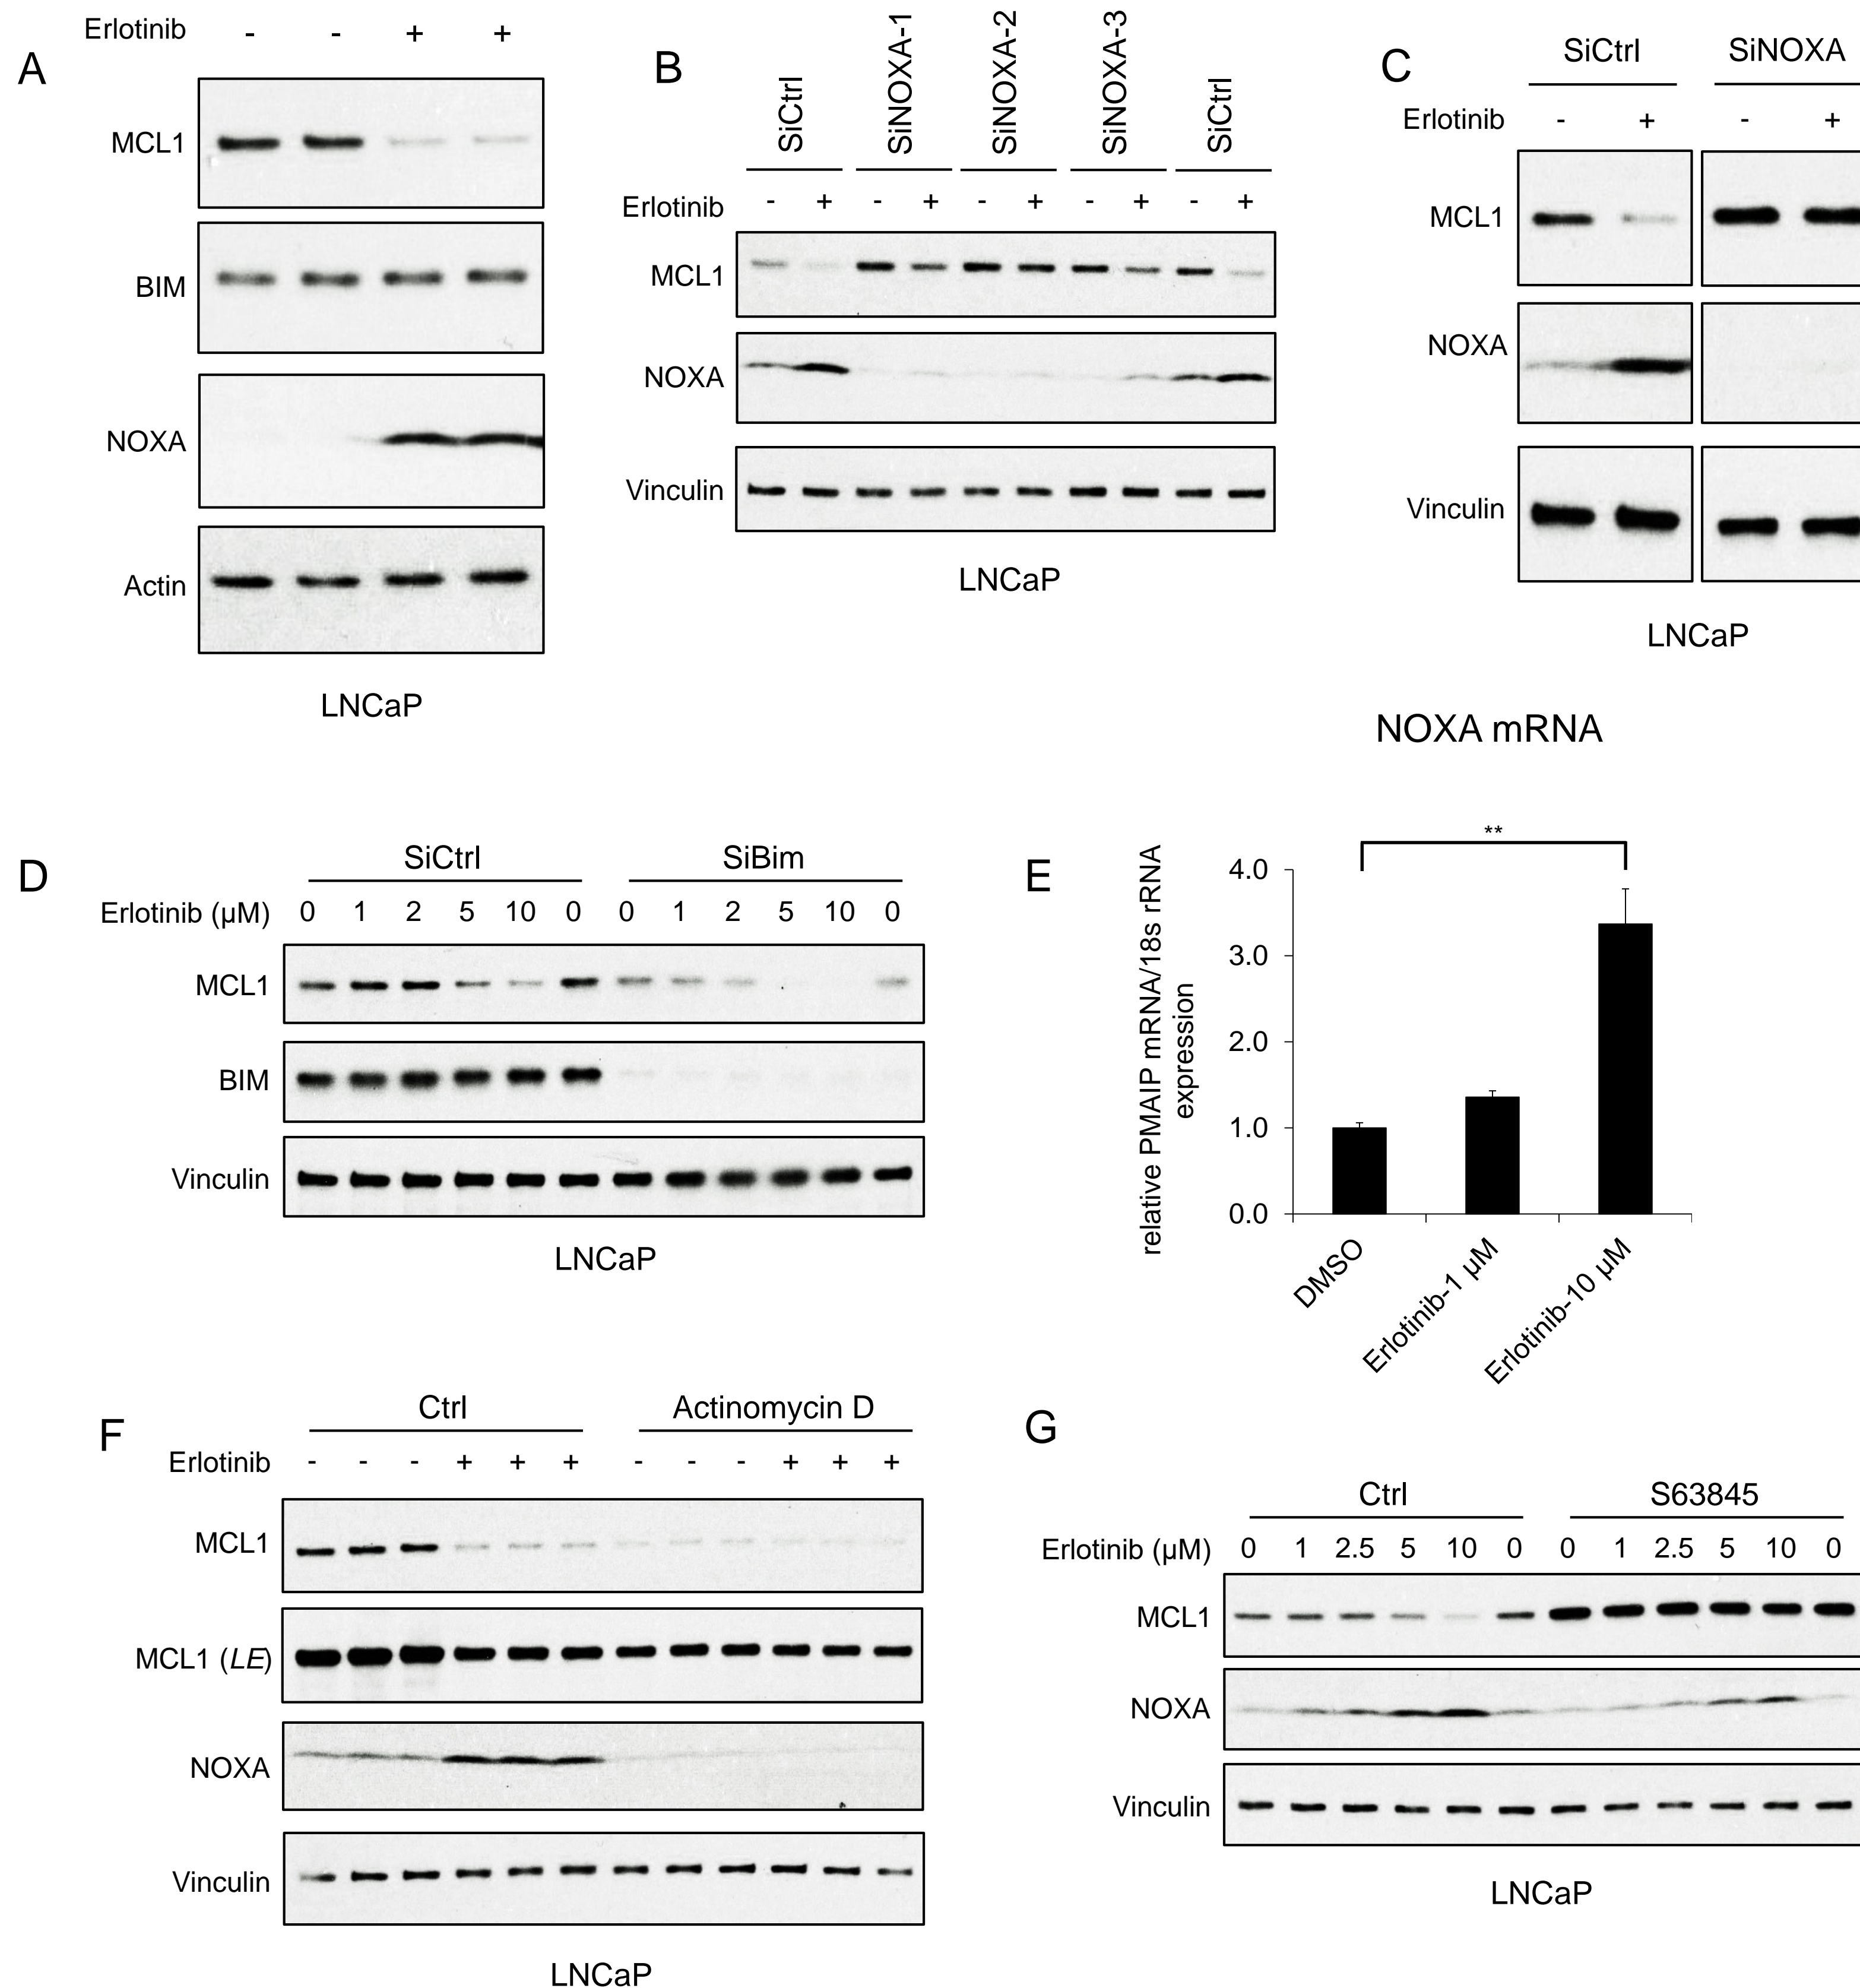

bioRxiv preprint doi: <https://doi.org/10.1101/2020.01.12.903369>; this version posted January 13, 2020. The copyright holder for this preprint (which was not certified by peer review) is the author/funder, who has granted bioRxiv a license to display the preprint in perpetuity. It is made available under aCC-BY 4.0 International license.

**Fig. 1. EGFR Inhibition Decreases MCL1 via NOXA-dependent Mechanism.** (A) LNCaP cells were treated with EGFR inhibitor erlotinib (10 μM) for 3 hours, followed by immunoblotting. (B) LNCaP cells were transfected with 3 distinct NOXA siRNA or non-target control siRNA for 3 days, then were treated with erlotinib (10 μM) for 3 hours. (C) LNCaP cells were transfected with pooled NOXA siRNAs or non-target control siRNA for 3 days, then were treated with erlotinib (10 μM) for 5 hours. (D) LNCaP cells transfected with pooled BIM siRNAs or non-target control siRNA were treated with erlotinib (0-10 μM) for 3 hours. (E) LNCaP cells were treated with erlotinib (0-10 μM) for 2 hours, followed by NOXA (*PMAIP*) mRNA measurement by qRT-PCR. Data reflect biological triplicates with each mRNA sample assayed in duplicate (technical replicate). 18s rRNA was used as an internal control. (\*\*,  $P < 0.01$ ). (F) LNCaP cells were pretreated with RNA synthesis inhibitor actinomycin D (10 μg/ml) for 30 min, followed by treatment with erlotinib (10 μM) for 3 hours. LE, long exposure. (G) LNCaP cells were pretreated with MCL1 inhibitor S63845 (500 nM) for 3 hours, followed by treatment with erlotinib (0-10 μM) for 3 hours. Immunoblots are representative of results obtained in at least 3 independent experiments.



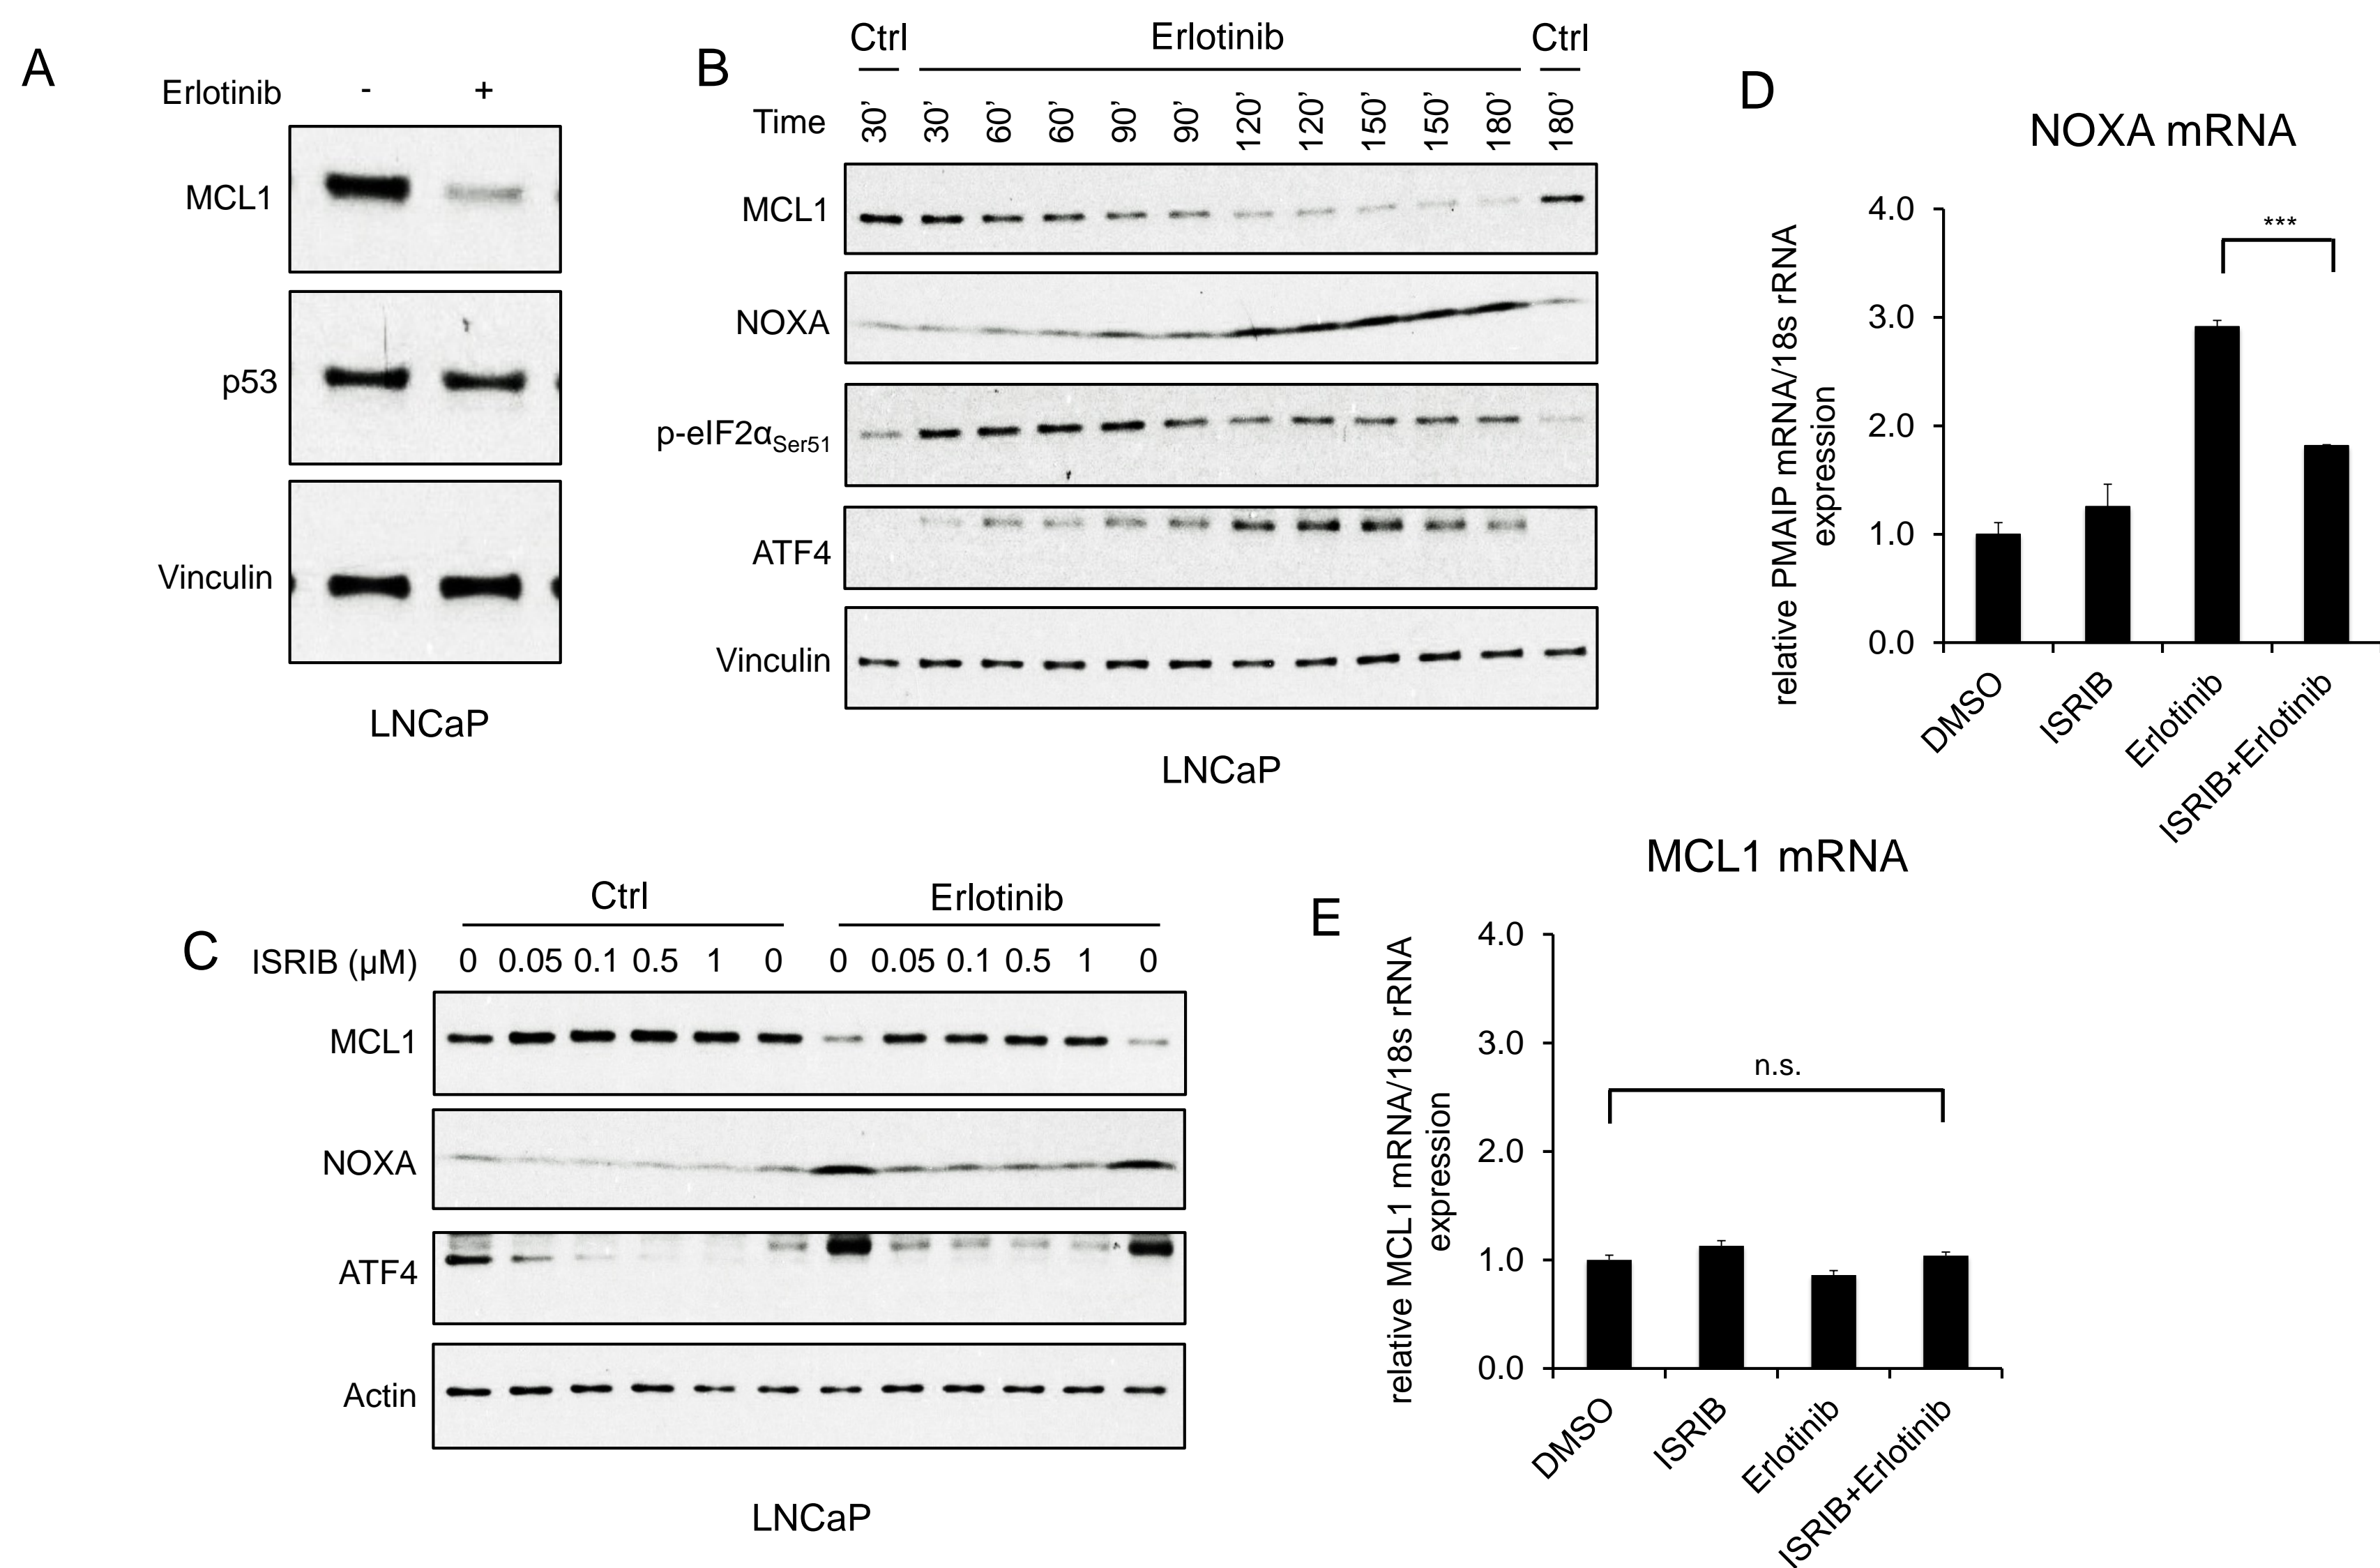

**Fig. 2. EGFR Inhibition Upregulates NOXA through ISR Activation.** (A) LNCaP cells were treated with erlotinib (10  $\mu$ M) for 3 hours, followed by immunoblotting. (B) LNCaP cells were treated with erlotinib (10  $\mu$ M) at time 0 and were harvested over a time course from 30 to 180 minutes. (C) LNCaP cells were treated with ISR inhibitor ISRIB trans-isomer (0-1  $\mu$ M) for 1 hour, followed by treatment with erlotinib (10  $\mu$ M) for 3 hours. (D and E) LNCaP cells were pretreated with ISRIB trans-isomer (100 nM) or DMSO for 1 hour, followed by erlotinib (10  $\mu$ M) or DMSO for 2 hours. NOXA (*PMAIP*) mRNA (D) and *MCL1* mRNA (E) were measured by qRT-PCR. Data reflect biological triplicates with each mRNA sample assayed in duplicate (technical replicate). 18s rRNA was used as an internal control. (n.s., not significant; \*\*\*,  $P < 0.001$ ). Immunoblots in (A) and (C) are representative of results obtained in 3 independent experiments, and (B) is representative of 2 independent experiments.



**Fig. 3**

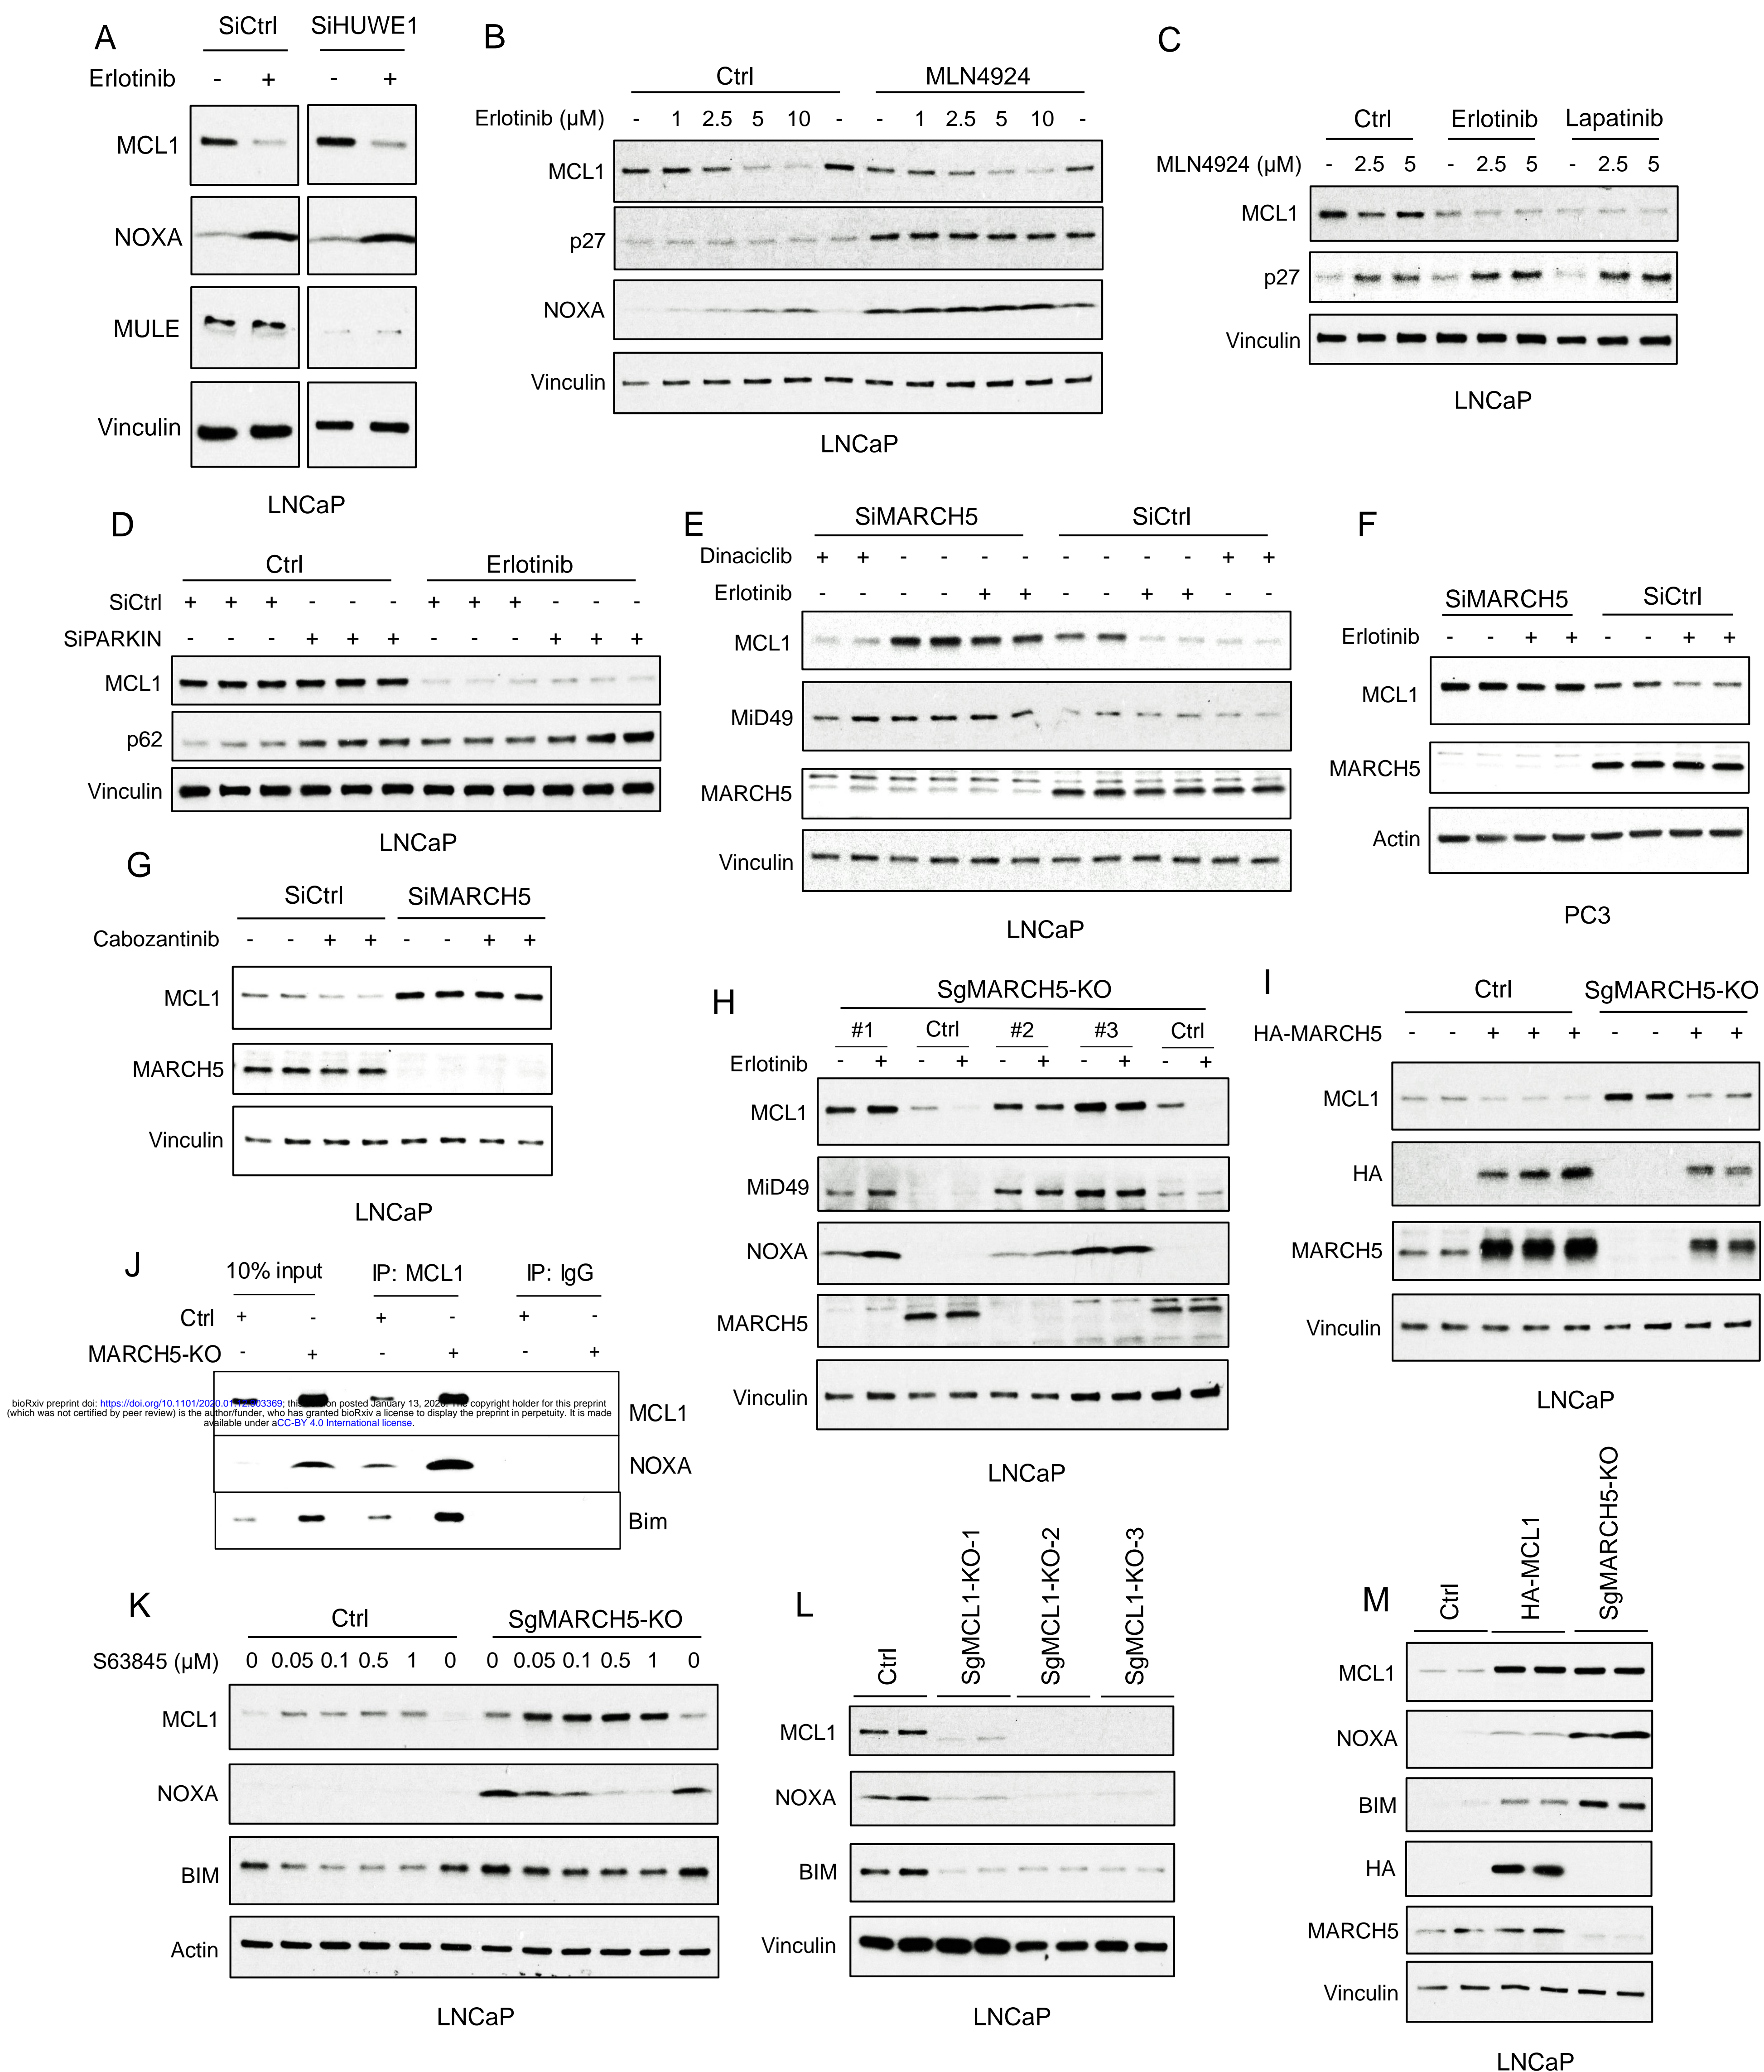



**Fig. 3. Tyrosine Kinase Inhibitors Decrease MCL1 via Mitochondria-associated E3 Ligase MARCH5.** (A) LNCaP cells transfected with pooled HUWE1 (MULE) siRNAs or non-target control siRNA were treated with erlotinib (10  $\mu$ M) for 5 hours, followed by immunoblotting. (B) LNCaP cells were pretreated with NEDD8 inhibitor MLN4924 (2.5  $\mu$ M) for 1 hour, followed by treatment with erlotinib (0-10  $\mu$ M) for 4 hours. Efficacy of NEDD8 block by MLN4924 was confirmed by blotting for p27. (C) LNCaP cells were pretreated with MLN4924 (0-5  $\mu$ M) for 1 hour, followed by treatment with DMSO, erlotinib (10  $\mu$ M), or EGFR/ERBB2 inhibitor lapatinib (10  $\mu$ M) for 3 hours. (D) LNCaP cells transfected with pooled PARKIN siRNAs or non-target control siRNA were treated with erlotinib (10  $\mu$ M) for 4 hours. (E) LNCaP cells transfected with pooled MARCH5 siRNAs or non-target control siRNA were treated with DMSO, erlotinib (10  $\mu$ M), or dinaciclib (200 nM) for 4 hours. (F) PC3 cells transfected with pooled MARCH5 siRNAs or non-target control siRNA were treated with erlotinib (10  $\mu$ M) for 4 hours. (G) LNCaP cells transfected with pooled MARCH5 siRNAs or non-target control siRNA were treated with multi-kinase inhibitor cabozantinib (5  $\mu$ M) for 5 hours. (H) Three MARCH5 deficient LNCaP subclones generated with CRISPR/CAS9 and guide RNAs (SgMARCH5-KO #1-3), and 1 negative control clone (Ctrl), were treated with erlotinib (10  $\mu$ M) for 4 hours. (I) SgMARCH5-KO or control LNCaP cells were transiently transfected with HA-tagged MARCH5, followed by immunoblotting. (J) Cell lysates of SgMARCH5-KO or control LNCaP with same protein amounts were subject to immunoprecipitation using anti-MCL1 rabbit antibody or control rabbit IgG with protein A agarose, followed by immunoblotting with mouse antibodies targeting for indicated proteins. (K) SgMARCH5-KO or control LNCaP cells were treated with S63845 (0-1  $\mu$ M) for 12 hours. (L) Three MCL1 deficient LNCaP subclones generated with CRISPR/CAS9 and guide RNAs (MCL1-KO-1-3) or 1 negative control clone (Ctrl) were lysed and were immunoblotted for indicated proteins. (M) SgMARCH5-KO, HA-tagged MCL1 overexpressing (HA-MCL1), or control LNCaP cells were lysed and immunoblotted for indicated proteins. Immunoblots in (A, C, D,G) are representative of results obtained in 2 independent experiments, and the remainder are representative of at least 3 independent experiments.



**Fig. 4**

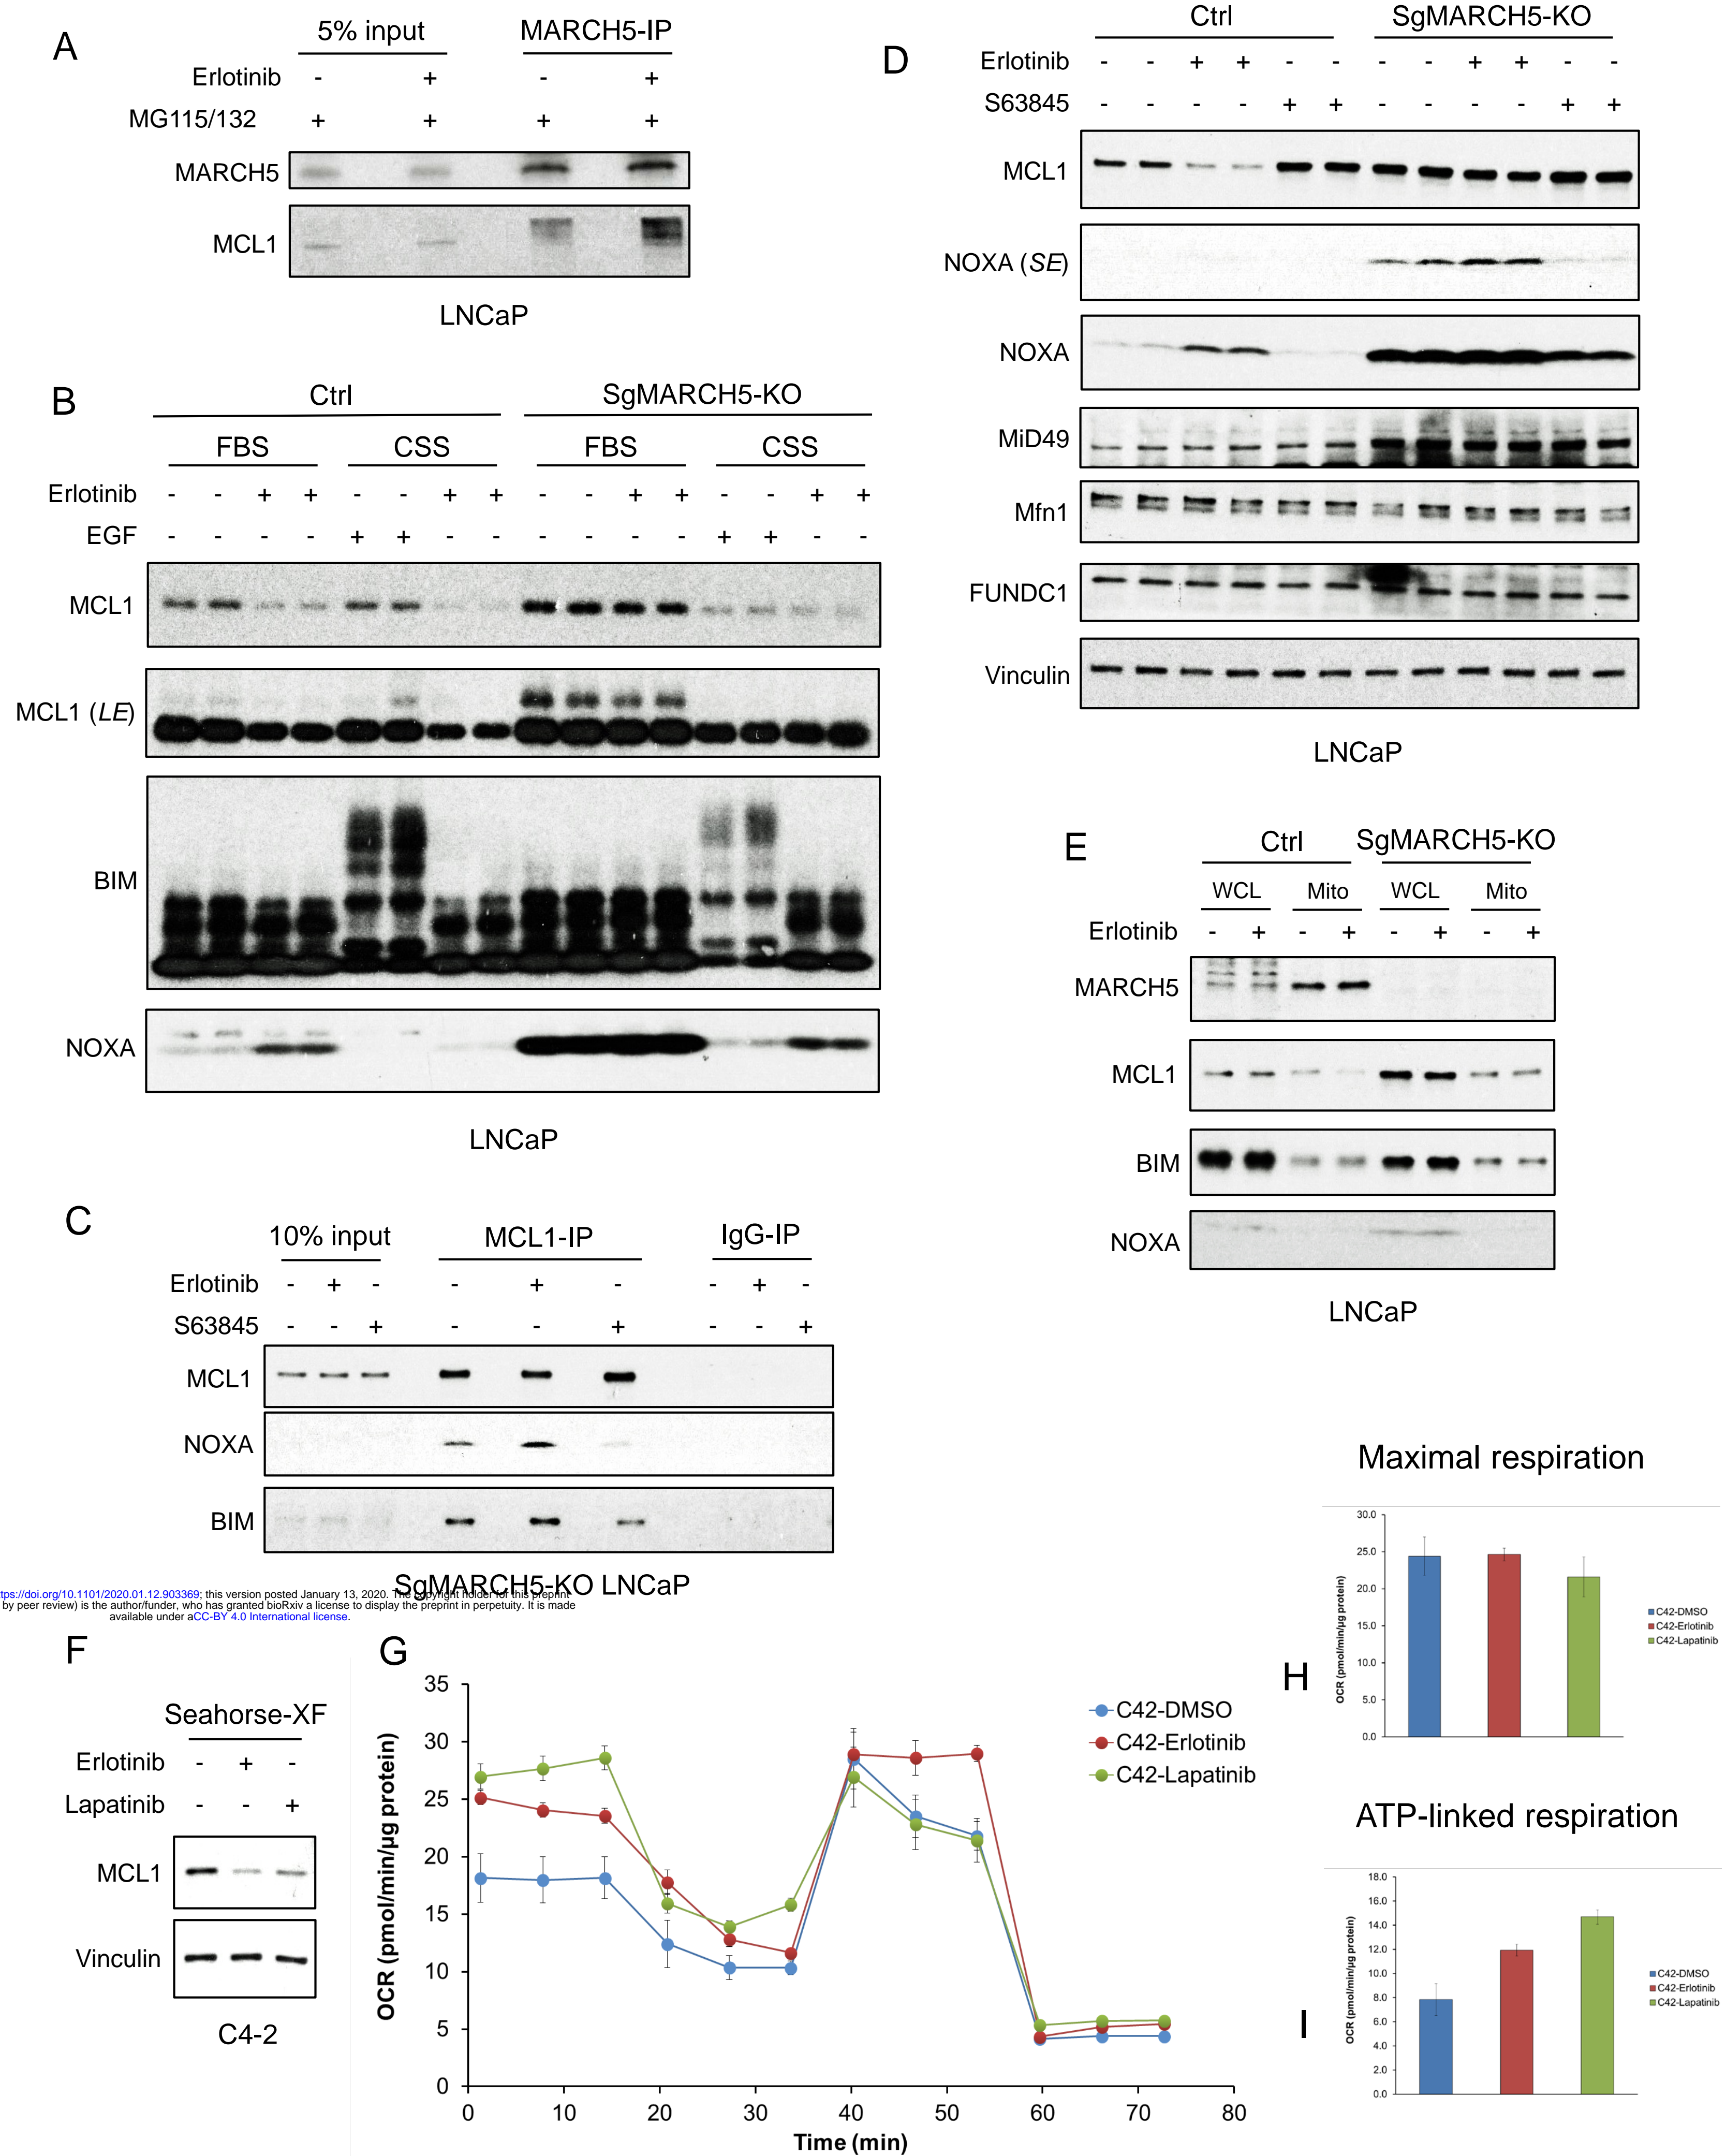



**Fig. 4. EGFR Inhibition Enhances MARCH5-MCL1 Interaction Without Altering MARCH5 Activity.** (A) LNCaP cells were pretreated with proteasome inhibitors MG115 (10  $\mu$ M) and MG132 (10  $\mu$ M) for 1 hour, followed by treatment with erlotinib (10  $\mu$ M) or DMSO for 3 hours. The cell lysates were subject to immunoprecipitation using anti-MARCH5 rabbit antibody with protein A agarose, followed by immunoblotting with anti-MARCH5 rabbit antibody or anti-MCL1 mouse antibody. (B) SgMARCH5-KO or control LNCaP cells were pre-incubated in normal serum medium (FBS) or charcoal-stripped serum medium (CSS) for 1 day, followed by treatment with erlotinib (10  $\mu$ M) for 3 hours or EGF (100 ng/ml) for 30 min. LE, long exposure. (C) SgMARCH5-KO LNCaP cells were treated with erlotinib (10  $\mu$ M), S63845 (0.5  $\mu$ M), or DMSO for 3 hours. The cell lysates were immunopurified with anti-MCL1 rabbit antibody or control rabbit IgG and protein A agarose, followed by immunoblotting with mouse antibodies targeting for indicated proteins. (D) SgMARCH5-KO or control LNCaP cells were treated with erlotinib (10  $\mu$ M), S63845 (500 nM), or DMSO for 3 hours. SE, short exposure. (E) SgMARCH5-KO or control LNCaP cells were treated with erlotinib (10  $\mu$ M) for 2 hours. Proteins extracted from whole cell lysates (WCL) or isolated mitochondria (Mito) were analyzed by western blot. WCL, whole cell lysate. Mito, mitochondrial fraction. (F) LNCaP-derived C4-2 cells were incubated in Seahorse XF medium and treated with erlotinib (10  $\mu$ M) or lapatinib (10  $\mu$ M) for 4 hours. (G-I) C4-2 cells were treated with erlotinib (10  $\mu$ M), lapatinib (10  $\mu$ M), or DMSO for 3 hours, and maximal oxygen consumption rate (H) and ATP-linked oxygen consumption rate (I) were analyzed by a mitochondria stress test (G). Data in G-I are mean and standard deviation from 3 independent experiments. Immunoblot in (B) is representative of results obtained in 2 independent experiments, and the remainder are representative of at least 3 independent experiments.

**Fig. 5**

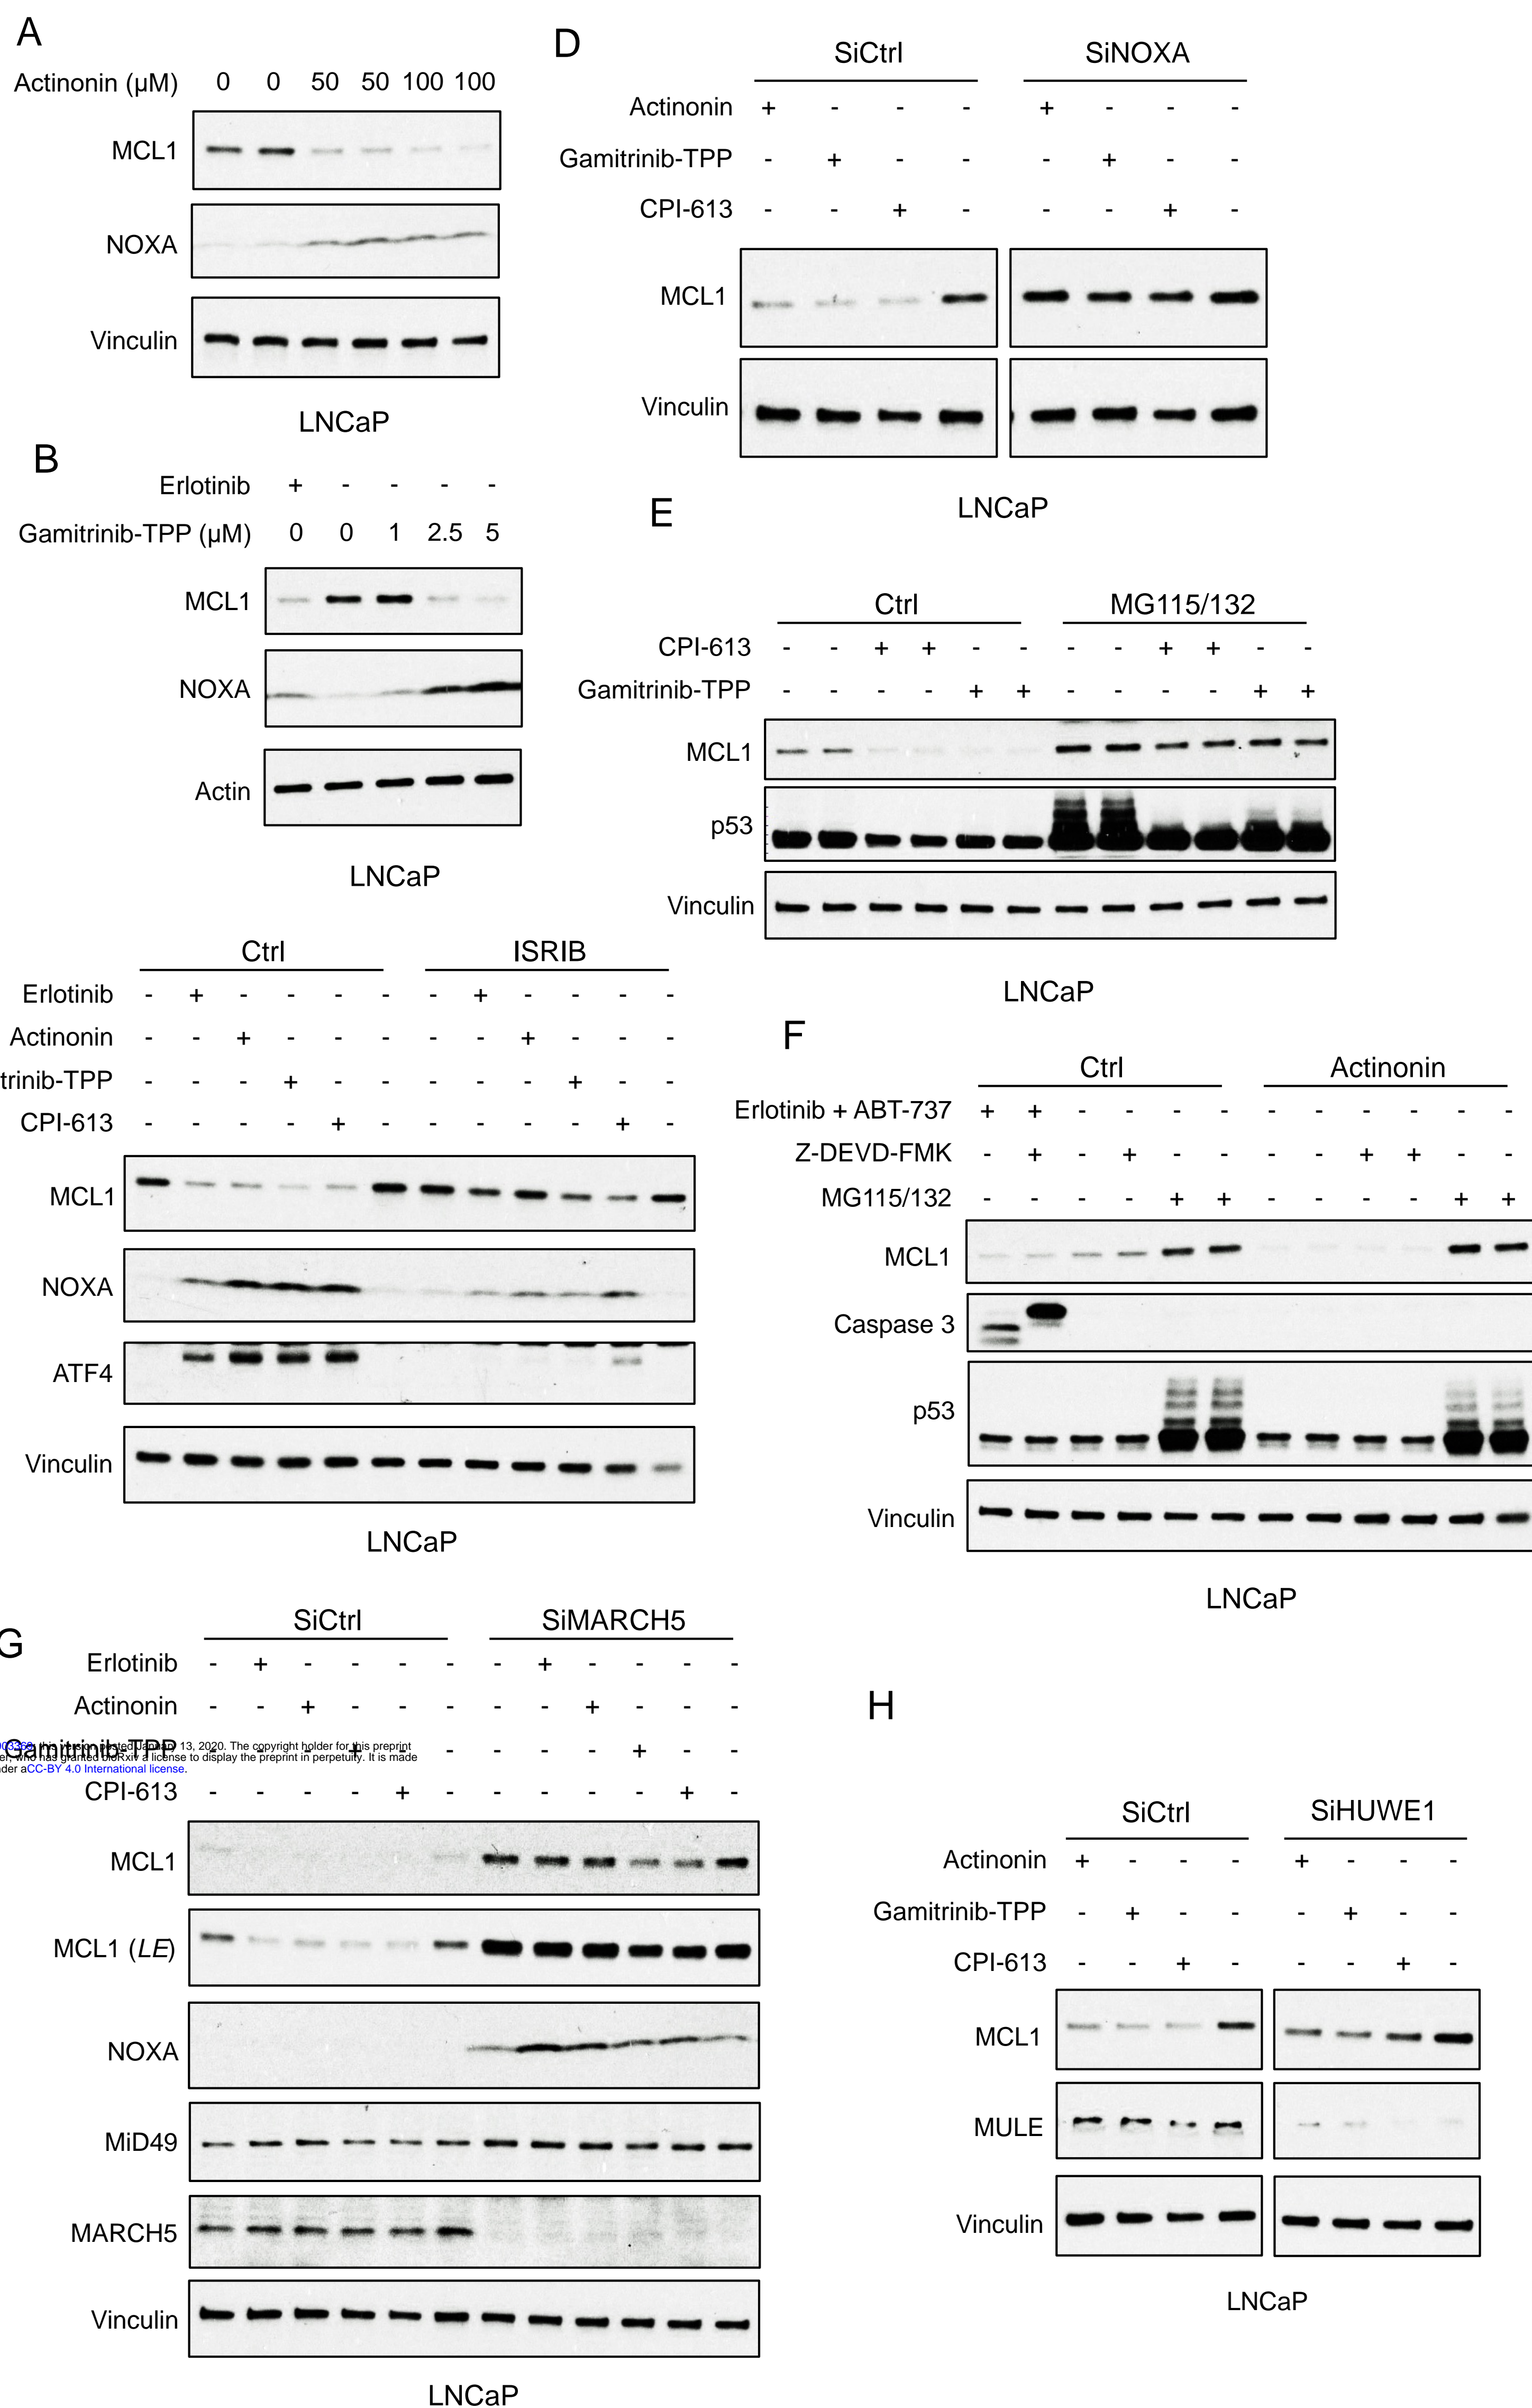



**Fig. 5. Mitochondria-targeted Agents Upregulate NOXA and Induce MARCH5-dependent MCL1 Degradation.**

(A) LNCaP cells were treated with human mitochondrial translation inhibitor actinonin (0-100  $\mu$ M) for 5 hours, followed by immunoblotting. (B) LNCaP cells were treated with mitochondrial HSP90 inhibitor gamitrinib-TPP (0-5  $\mu$ M) or erlotinib (10  $\mu$ M) for 9 hours. (C) LNCaP cells were pretreated with ISRIB trans-isomer (1  $\mu$ M) for 1 hour, followed by treatment with erlotinib (10  $\mu$ M), actinonin (100  $\mu$ M), gamitrinib-TPP (5  $\mu$ M), or pyruvate dehydrogenase/ $\alpha$ -ketoglutarate dehydrogenase inhibitor CPI-613 (200  $\mu$ M) for 5 hours. (D) LNCaP cells transfected with pooled NOXA siRNAs or non-target control siRNA were treated with actinonin (100  $\mu$ M), gamitrinib-TPP (5  $\mu$ M), CPI-613 (200  $\mu$ M), or DMSO for 5 hours. (E) LNCaP cells were pretreated with MG115 (10  $\mu$ M) and MG132 (10  $\mu$ M) for 1 hour, followed by treatment with CPI-613 (200  $\mu$ M), gamitrinib-TPP (5  $\mu$ M), or DMSO for 4 hours. Efficacy of proteasome block by MG115/MG132 was confirmed by blotting for p53. (F) LNCaP cells were pretreated with MG115/MG132 (10  $\mu$ M each), caspase inhibitor Z-DEVD-FMK (20  $\mu$ M), or DMSO for 1 hour, followed by treatment with actinonin (75  $\mu$ M), combination of erlotinib (10  $\mu$ M) and BCLXL/BCL2 inhibitor ABT-737 (5  $\mu$ M), or DMSO for 5 hours. Efficacy of caspase block by Z-DEVD-FMK and proteasome block by MG115/MG132 were confirmed by blotting for caspase 3 and p53, respectively. (G) LNCaP cells transfected with pooled MARCH5 siRNAs or non-target control siRNA were treated with erlotinib (10  $\mu$ M), actinonin (100  $\mu$ M), gamitrinib-TPP (5  $\mu$ M), CPI-613 (200  $\mu$ M), or DMSO for 5 hours. LE, long exposure. (H) LNCaP cells transfected with pooled HUWE1 (MULE) siRNAs or non-target control siRNA were treated with actinonin (100  $\mu$ M), gamitrinib-TPP (5  $\mu$ M), CPI-613 (200  $\mu$ M), or DMSO for 5 hours. Immunoblots in (A and F) are representative of results obtained in 2 independent experiments, and the remainder are representative of at least 3 independent experiments.

**Fig. 6**

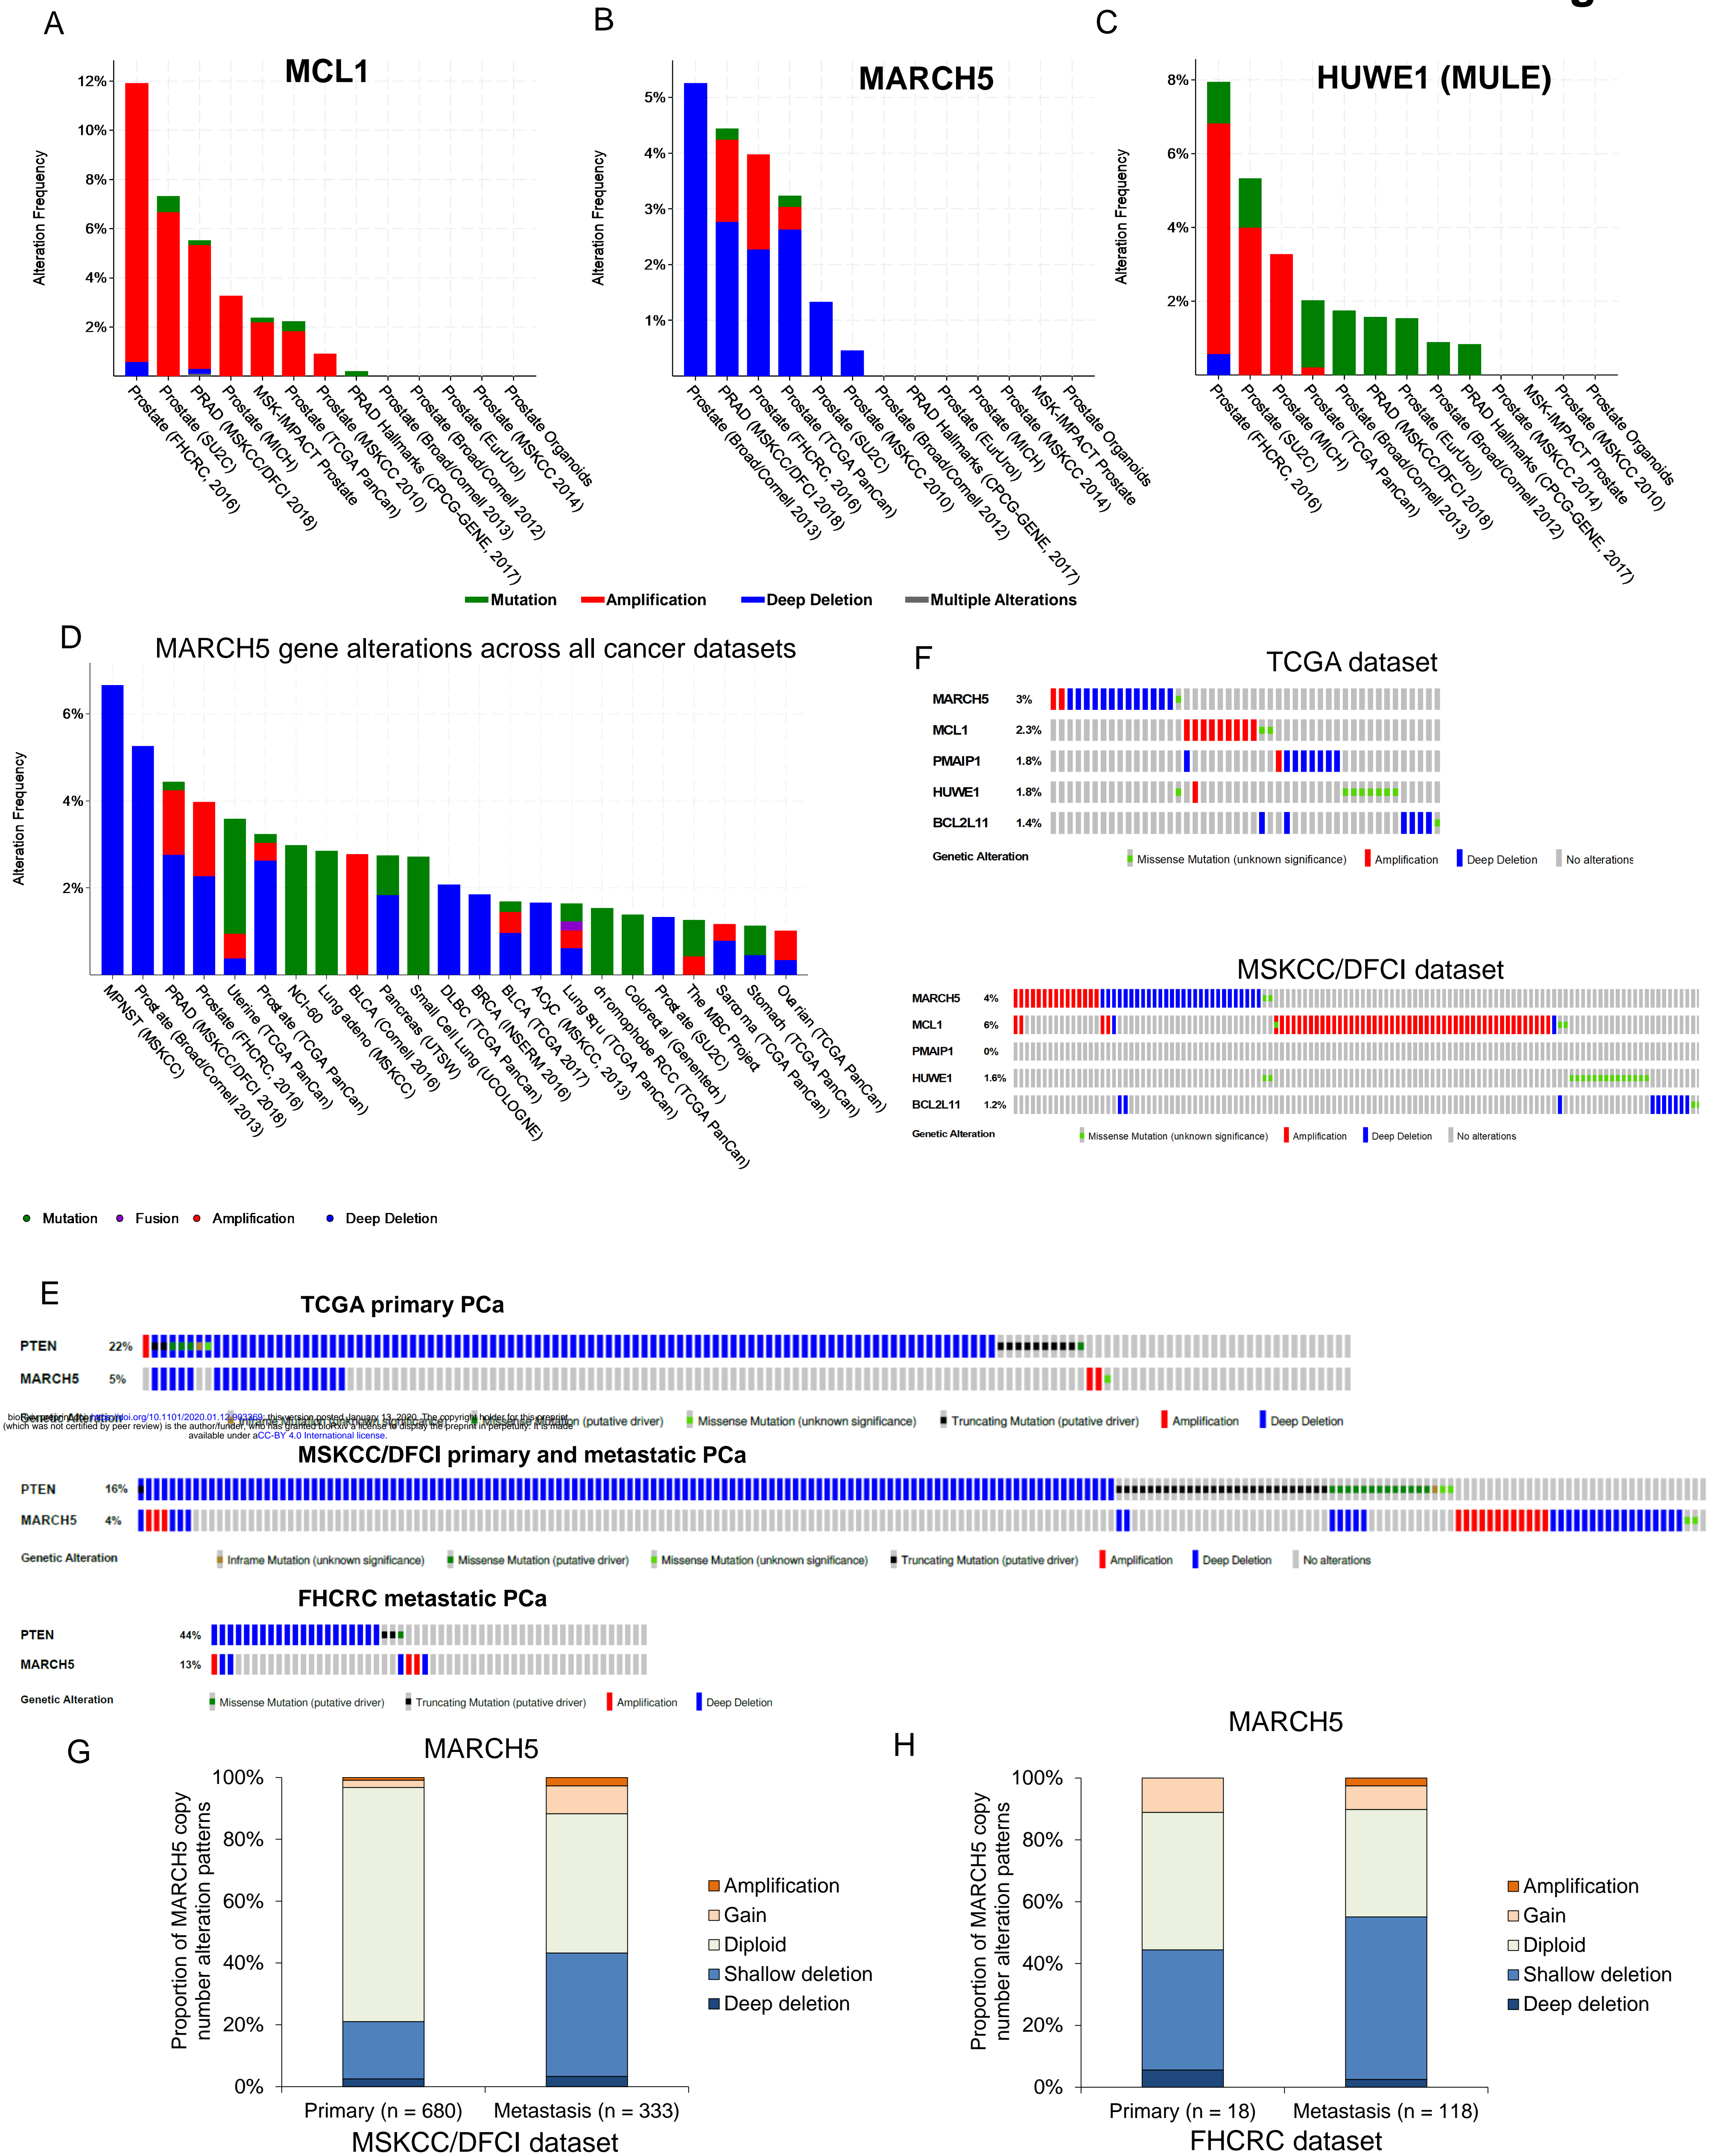



**Figure 6. MARCH5 Deletion or MCL1 Amplification Exists in Subsets of PCa Patients.** (A-C) Molecular profiles (copy number alterations and mutation) of *MCL1* (A), *MARCH5* (B), and *HUWE1* (MULE) (C) among PCa datasets in the cBioPortal for Cancer Genomics (<http://cbioportal.org>). (D) Frequency and patterns for *MARCH5* gene alterations across all cancer datasets, frequency in MPNST (malignant peripheral nerve sheath tumors) reflects only one case. (E) Overlap between genomic alterations in *MARCH5* and *PTEN*. (F) Gene alterations for *MARCH5*, *MCL1*, *PMAIP* (NOXA), *HUWE1* (MULE), and *BCL2L11* (BIM) in TCGA dataset and MSKCC/DFCI PCa datasets. (G and H) Proportion of copy number alteration patterns for *MARCH5* between primary prostate tumor and metastatic prostate tumor samples in MSKCC/DFCI dataset (G) and FHCRC dataset (H).



**Fig. 7**

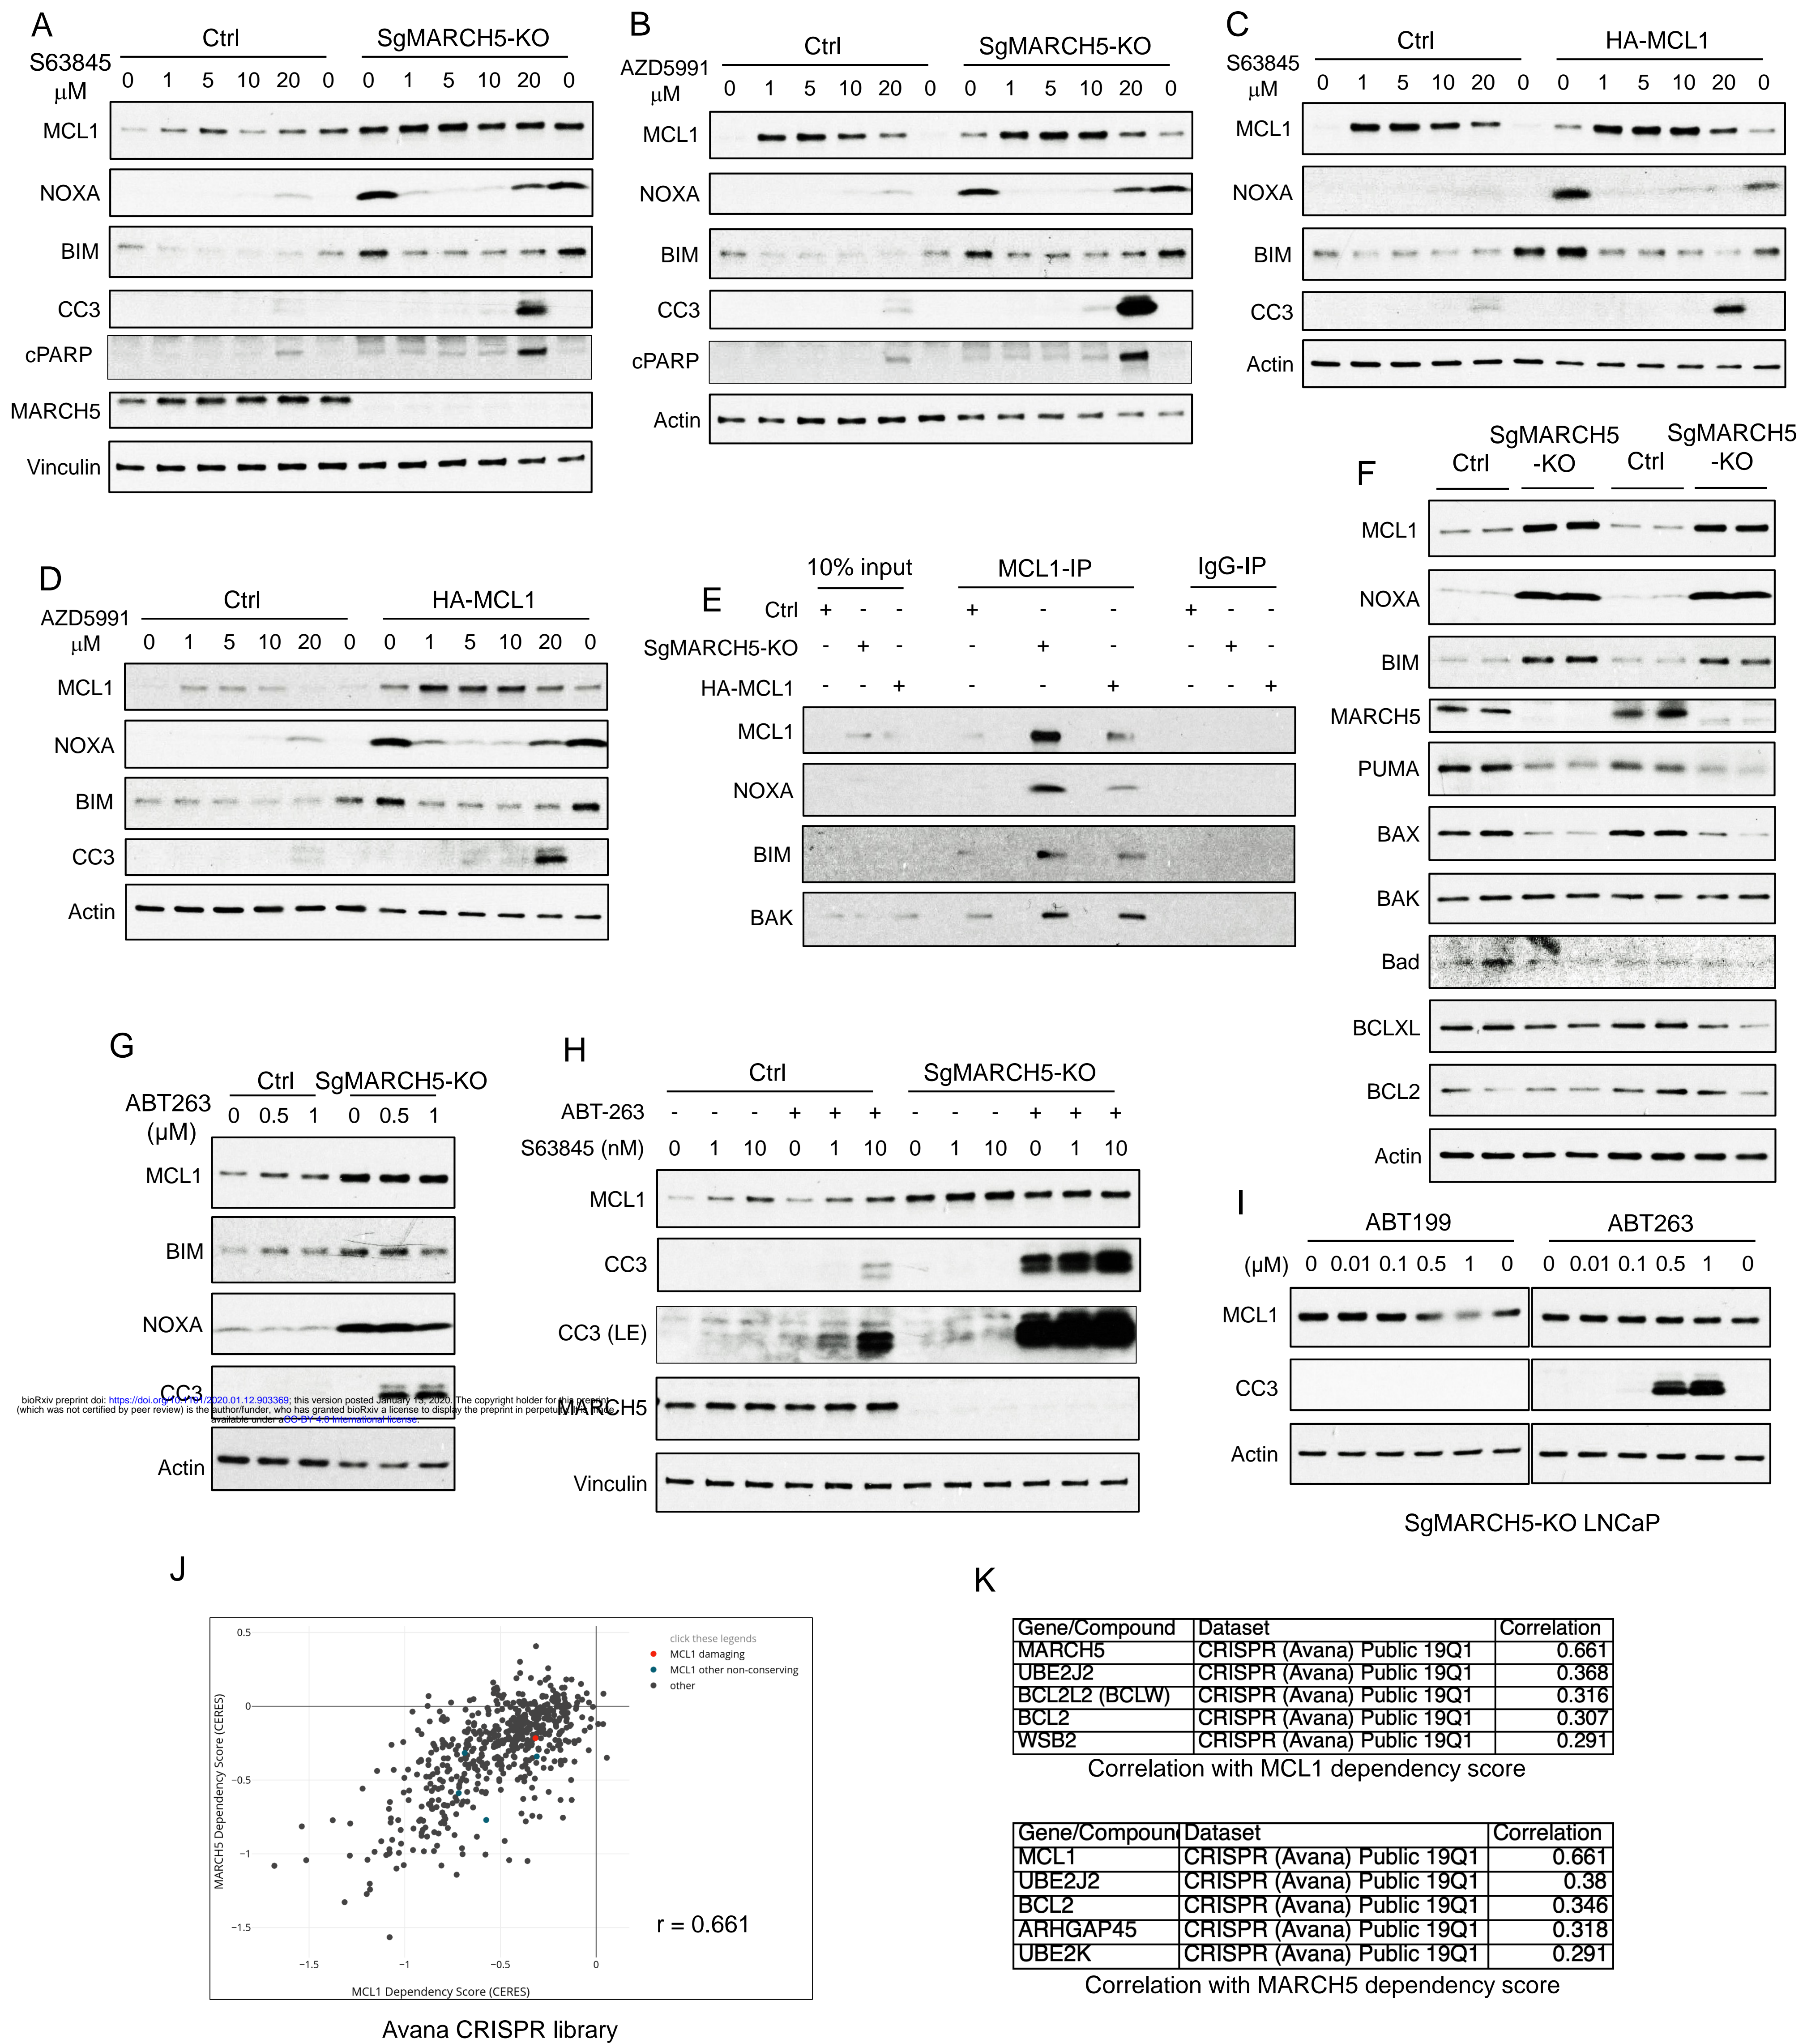



**Fig. 7. MARCH5 Depletion Sensitizes BH3 mimetics to Drive Apoptosis in PCa Cells. (A and B)**

SgMARCH5-KO or control LNCaP cells were treated with S63845 (0-20  $\mu$ M) (A) or another MCL1 inhibitor AZD5991 (0-20  $\mu$ M) (B) for 12 hours. Apoptosis induction was detected with cleaved caspase 3 (CC3) and cleaved PARP (cPARP) signals. (C and D) HA-MCL1 or control LNCaP cells were treated with S63845 (0-20  $\mu$ M) (C) or AZD5991 (0-20  $\mu$ M) (D) for 12 hours. (E) Cell lysates of SgMARCH5-KO, HA-MCL1, or control LNCaP with same protein amounts were immunoprecipitated using anti-MCL1 mouse antibody or control mouse IgG with protein G agarose, followed by immunoblotting with rabbit antibodies targeting MCL1, BIM, or BAK, or mouse antibody targeting NOXA. (F) SgMARCH5-KO or control LNCaP cells (biological replicates) were lysed and immunoblotted for indicated proteins. (G) SgMARCH5-KO or control LNCaP cells were treated with BCL2/BCLXL inhibitor ABT-263 (0-1  $\mu$ M) for 9 hours. (H) sgMARCH5-KO or control LNCaP cells were treated with S63845 (0-10 nM) and ABT-263 (500 nM) or DMSO and for 9 hours. LE, long exposure. (I) SgMARCH5-KO LNCaP cells were treated with BCL2 inhibitor ABT-199 (0-1  $\mu$ M) or ABT-263 (0-1  $\mu$ M) for 9 hours. (J) Correlation between *MCL1* dependency score and *MARCH5* dependency score in AVANA CRISPR screen. (K) Lists of top 5 genes whose dependency scores are correlated with *MCL1* dependency score (upper) or *MARCH5* dependency score (lower). Immunoblot in (F) is representative of results obtained in 2 independent experiments, and the remainder are representative of at least 3 independent experiments.

**A**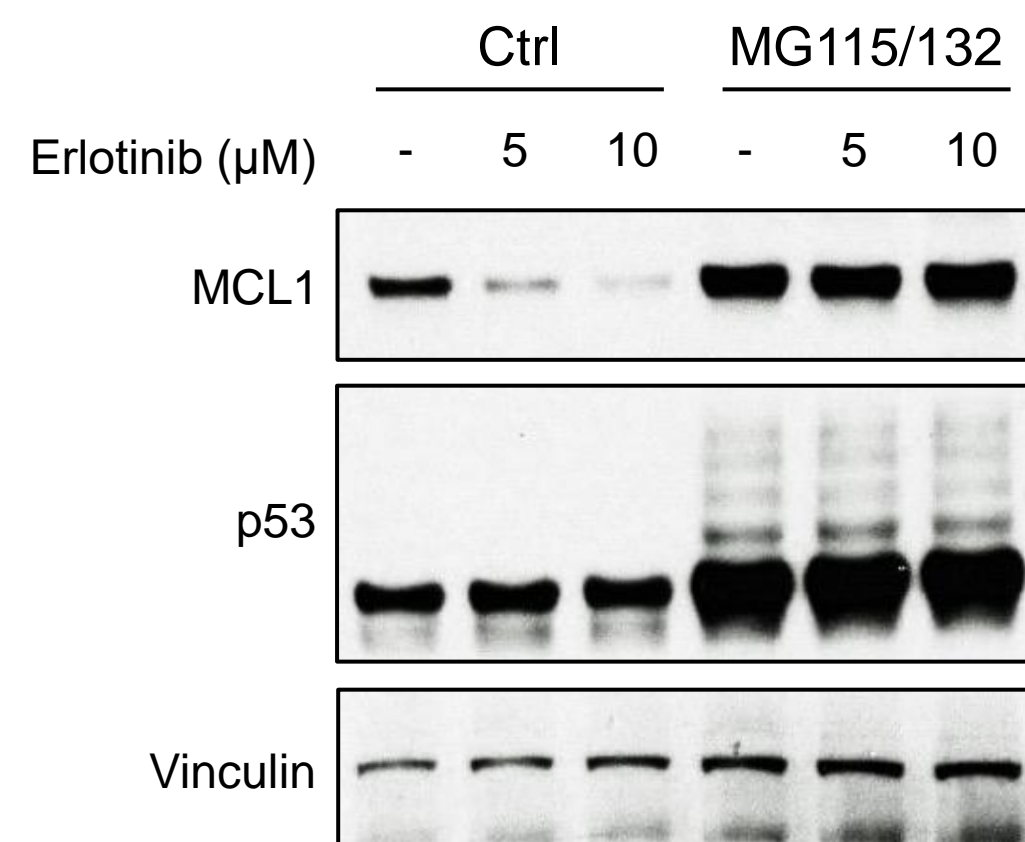**B**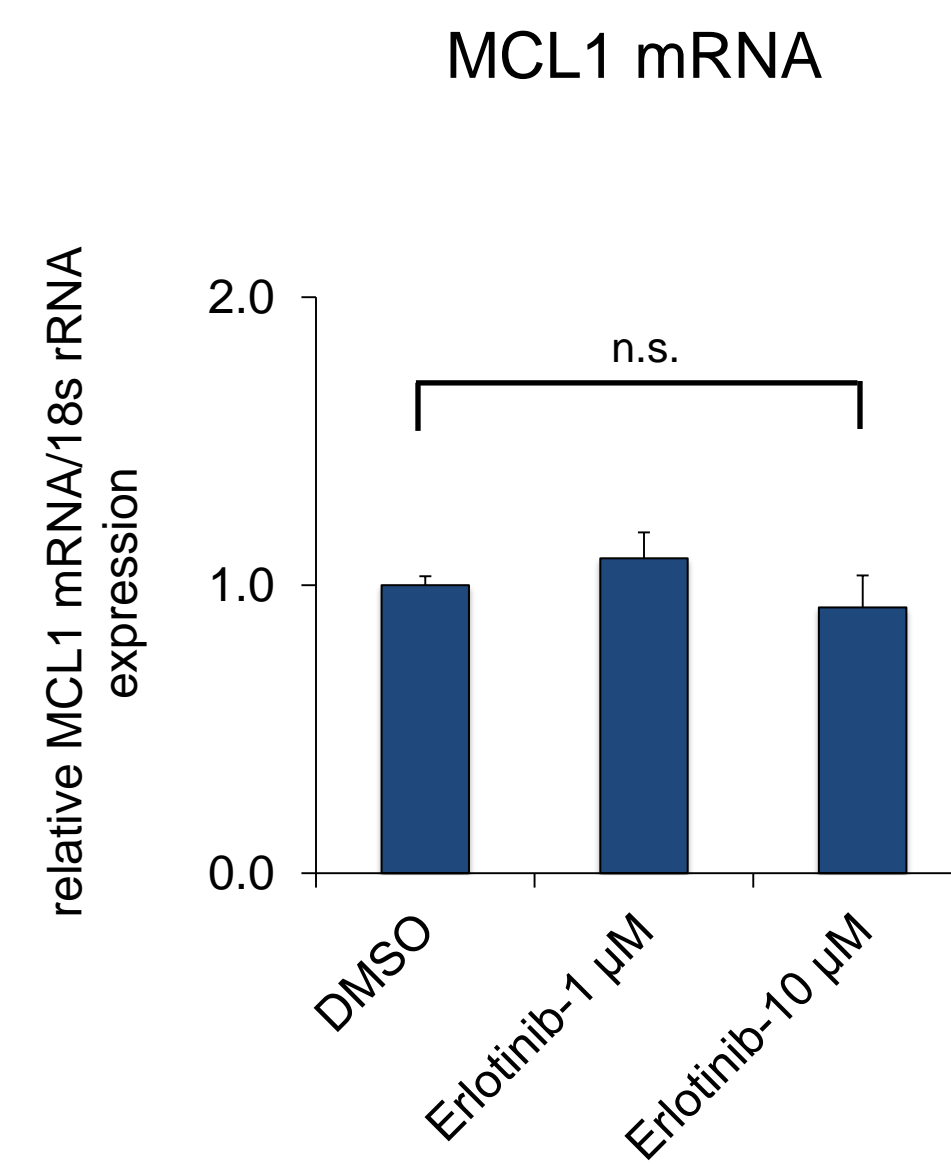

**Fig. S1 (Supplementary Fig. 1). EGFR inhibition increases proteasome-dependent MCL1 degradation.** (A) LNCaP cells were pretreated with MG115 (10 μM) and MG132 (10 μM) for 30 min, followed by treatment with erlotinib for 4 hours. (B) LNCaP cells were treated with DMSO or erlotinib for 2 hours, followed by *MCL1* mRNA measurement by qRT-PCR. *18s rRNA* was used as an internal control. (n.s., not significant).

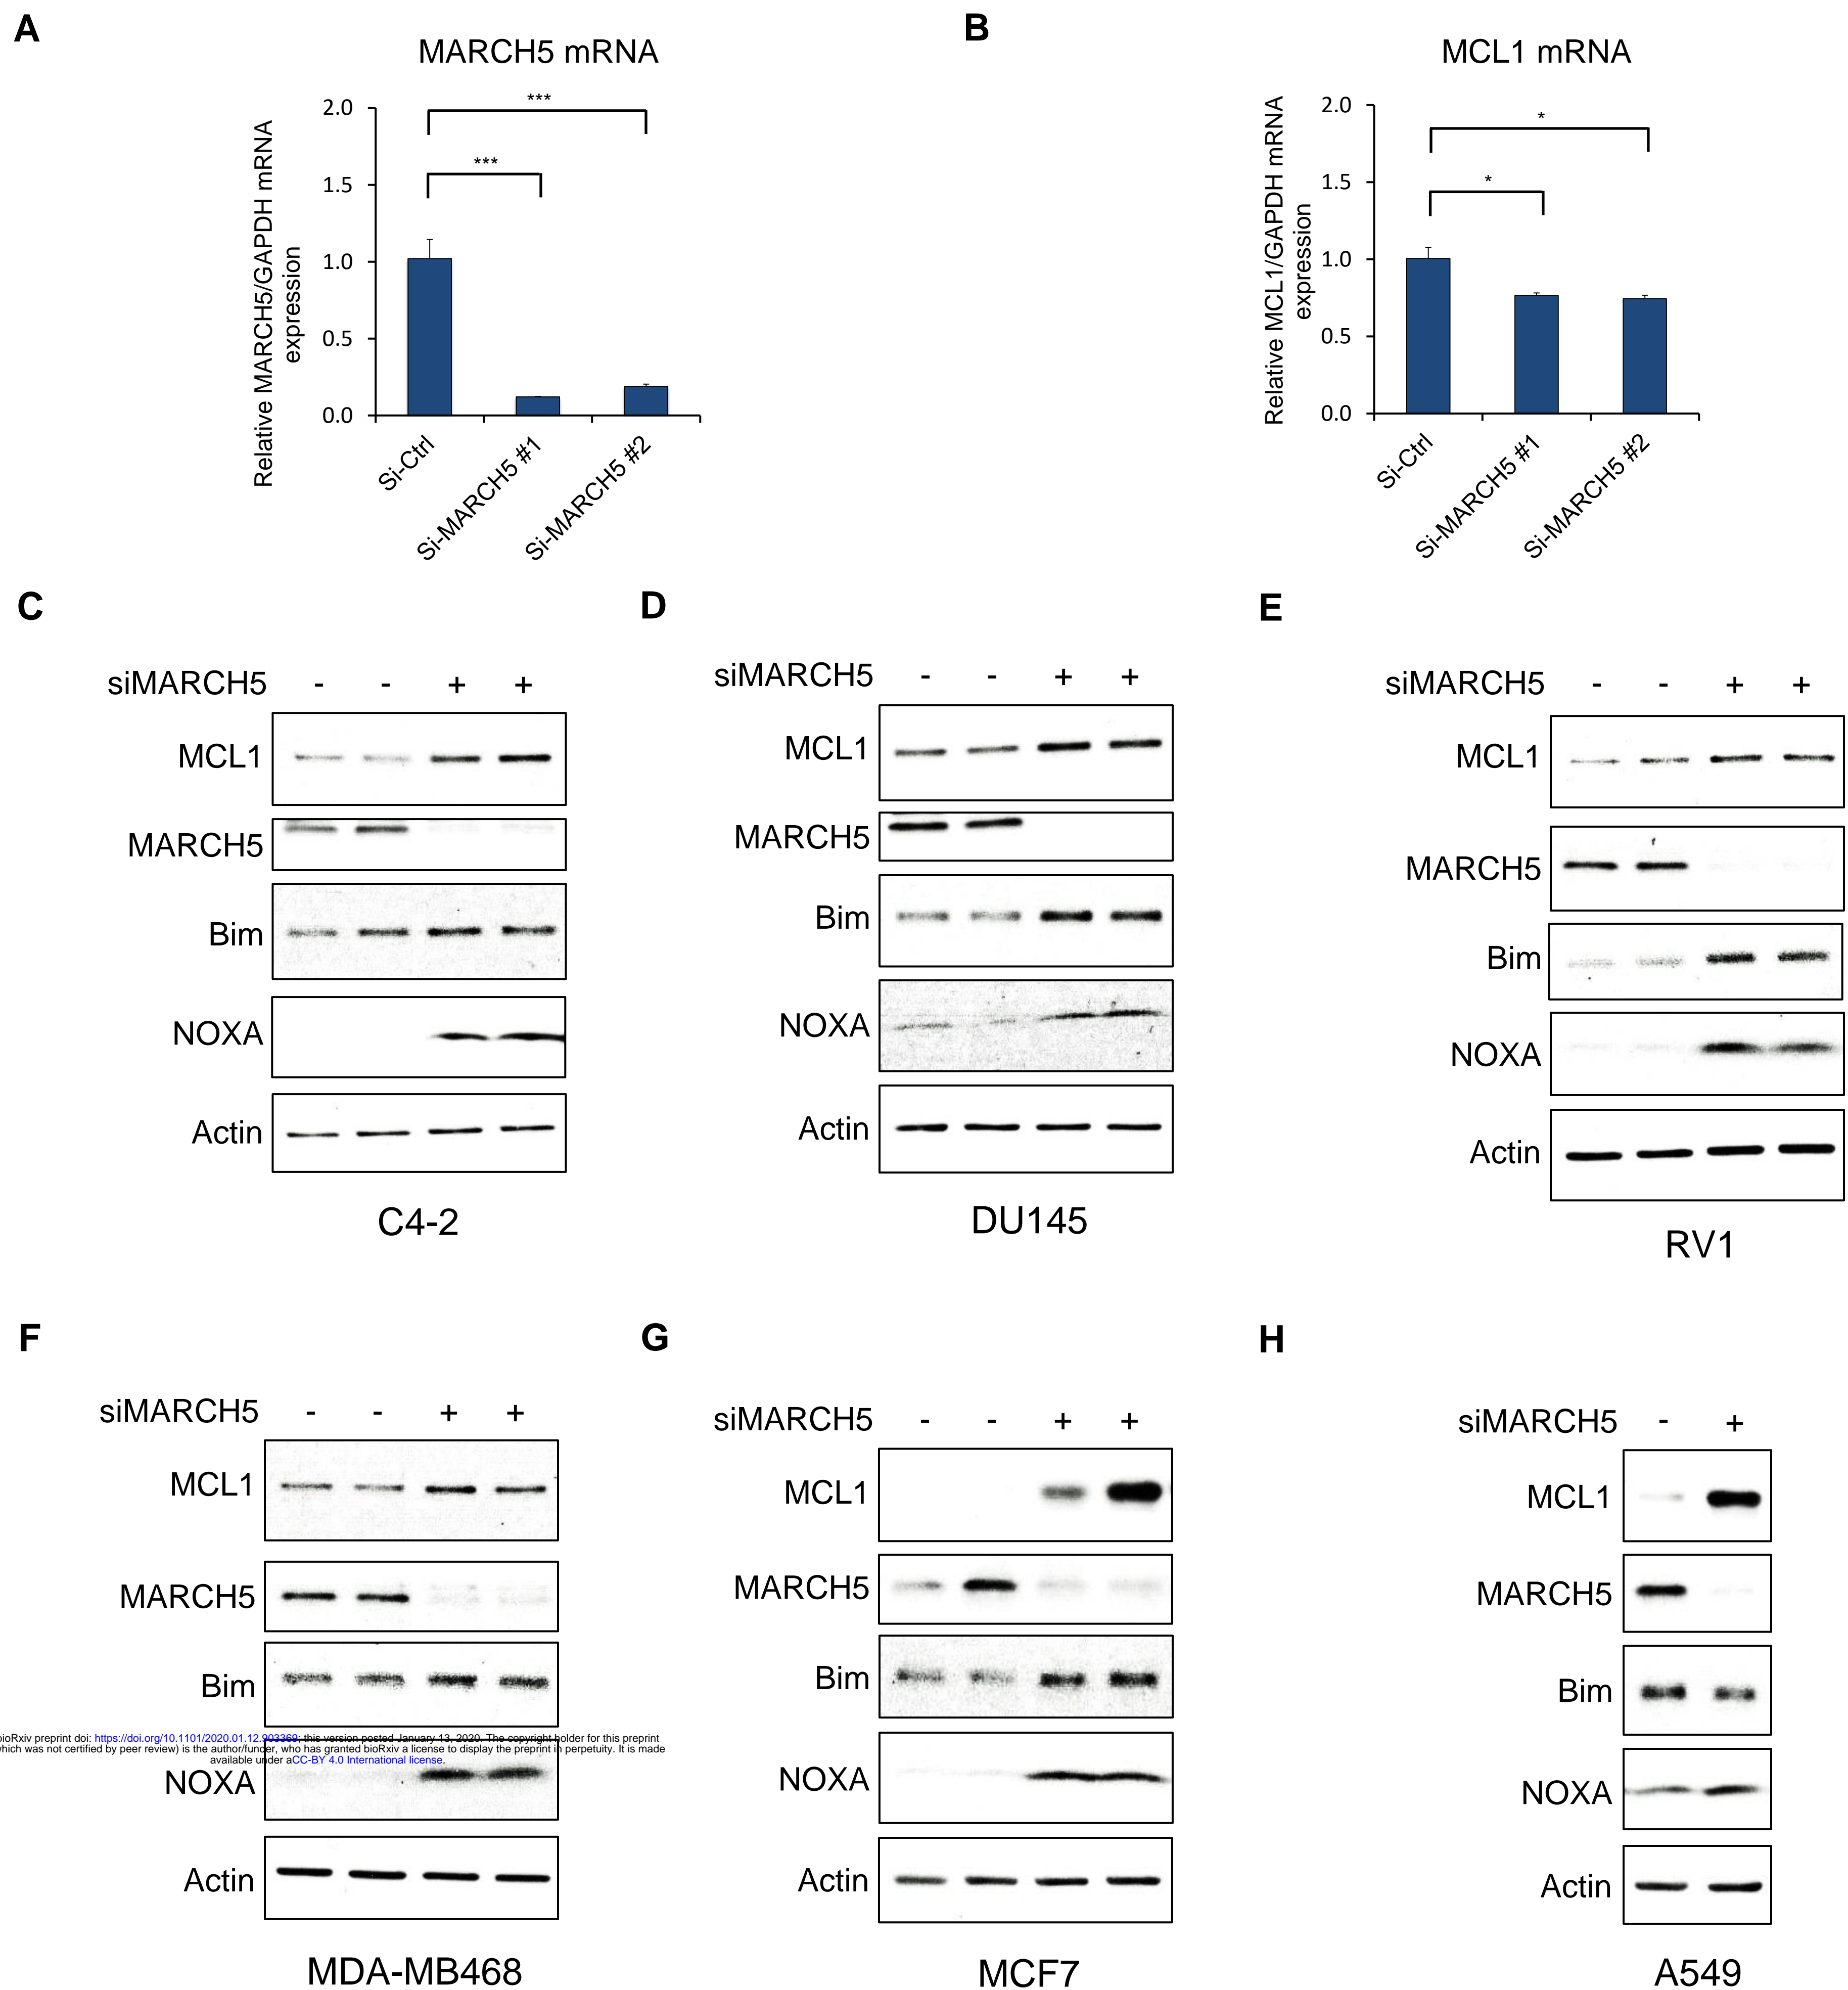

**Fig. S2 (Supplementary Fig. 3). MARCH5 knockdown increases MCL1 in additional PCa, breast, and lung cancer cell lines.** (A and B) LNCaP cells were transfected with MARCH5 pooled siRNAs (#1, Dharmacon), an individual siRNA (#2, Fisher) or non-target control. *MARCH5* mRNA (A) and *MCL1* mRNA (B) were measured by qRT-PCR. *GAPDH* was used as an internal control. (\*,  $P < 0.05$ ; \*\*\*,  $P < 0.001$ ). (C-I) C4-2 (C), DU145 (D) and RV1 (E) prostate cancer cells, MDA-MB468 (F) and MCF7 (G) breast cancer cells, and A549 lung cancer cells (H) were transfected with MARCH5 siRNA, followed by immunoblotting.



**A**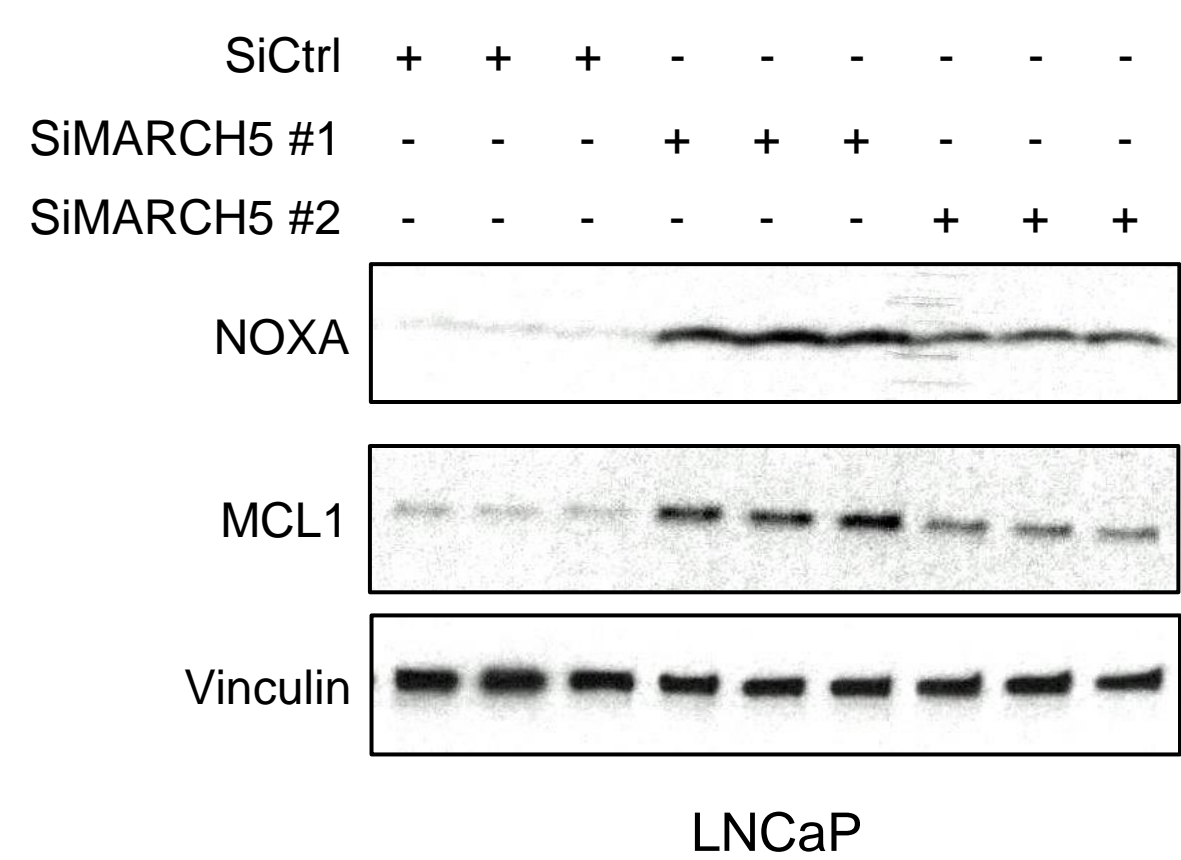**B**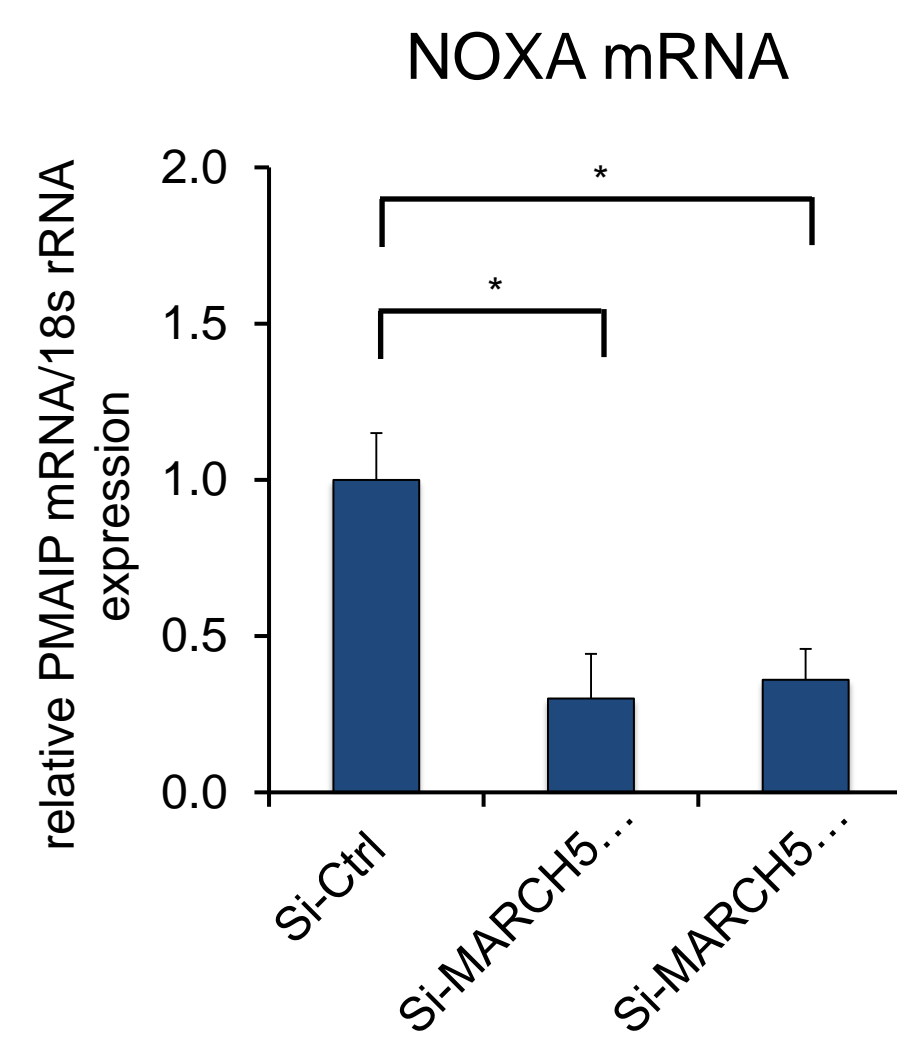

**Fig. S3 (Supplementary Fig. 3). MARCH5 depletion increases NOXA protein.** (A and B) LNCaP cells were transfected with MARCH5 pooled siRNAs (#1, Dharmacon), an individual siRNA (#2, Fisher), or non-target control, followed by western blot (A) or qRT-PCR (B). (\*,  $P < 0.05$ ).



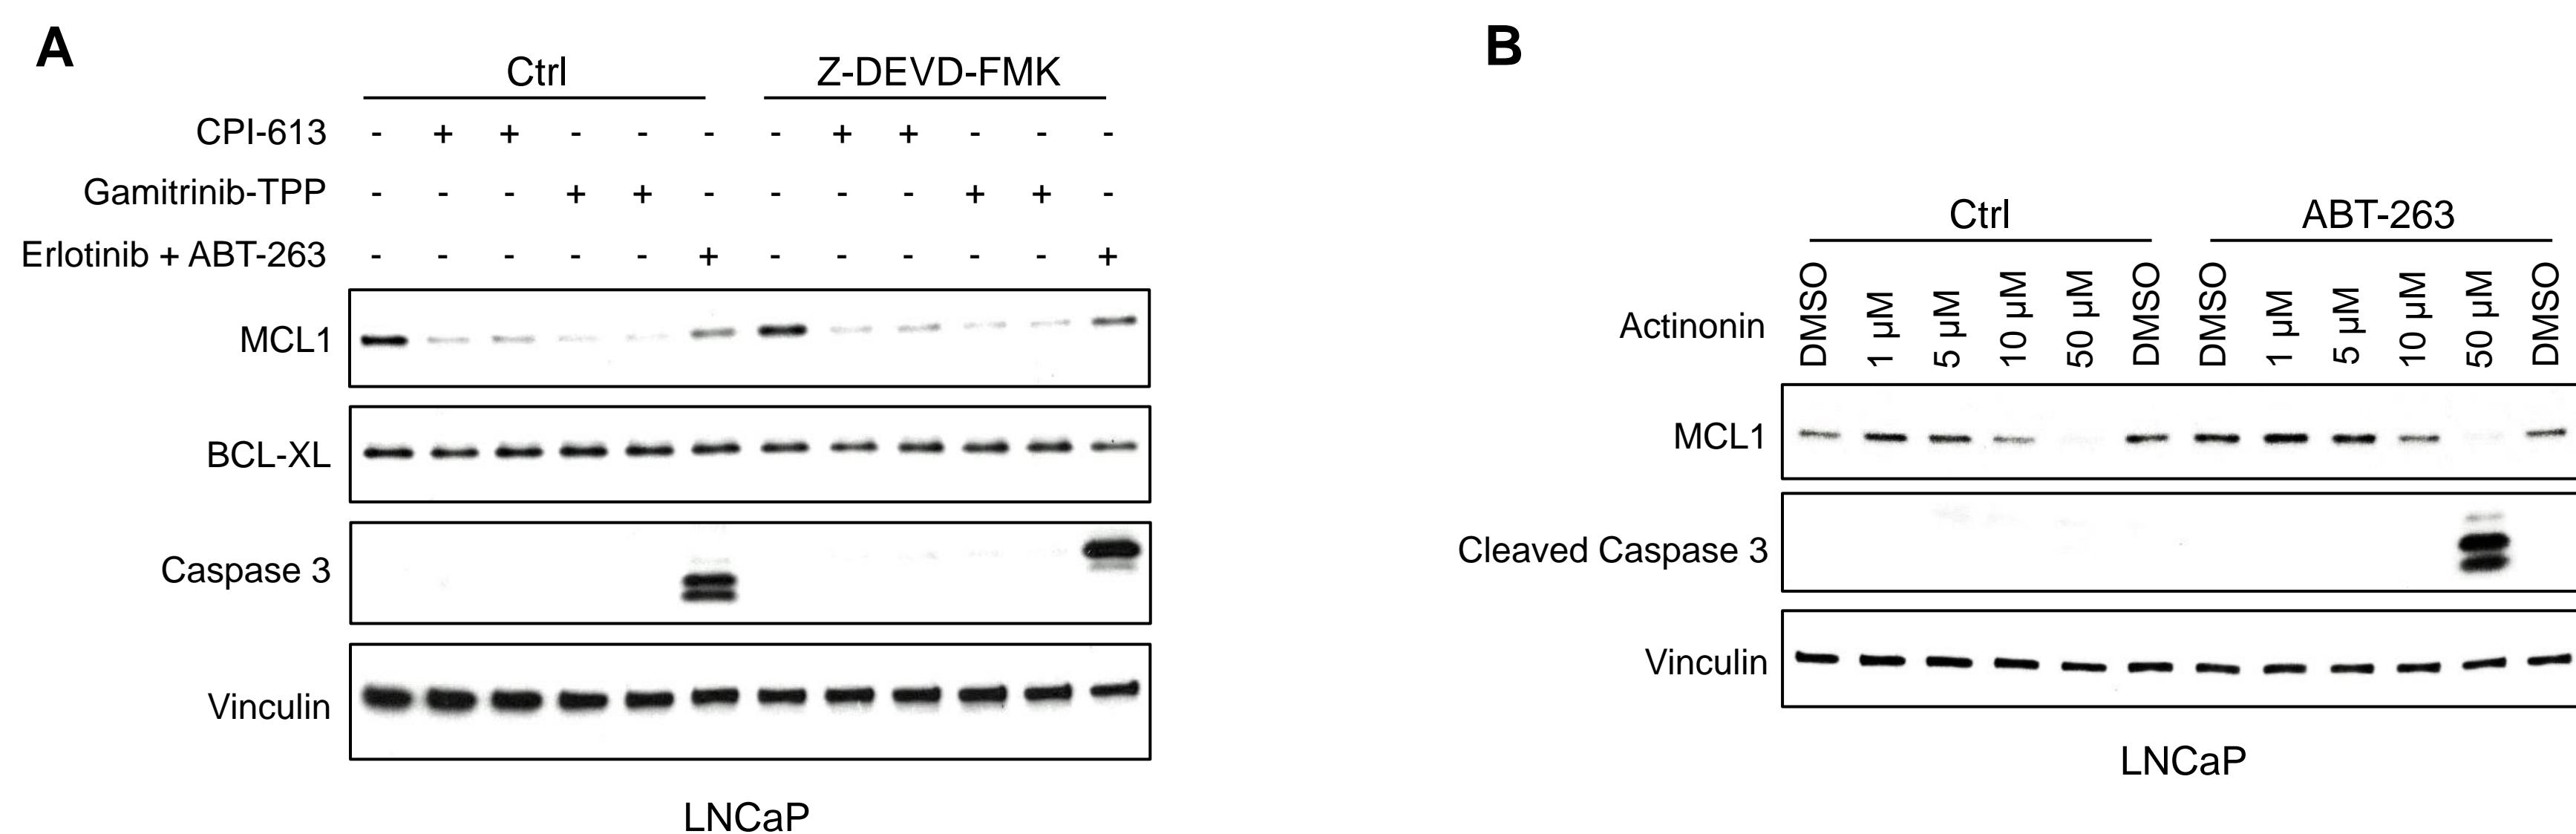

**Fig. S4 (Supplementary Fig. 5). Mitochondria-targeted agents increase caspase-independent MCL1 degradation and synergize with BCLXL/BCL2 inhibitor to induce apoptosis.** (A) LNCaP cells were pretreated with caspase inhibitor Z-DEVD-FMK (20  $\mu$ M) for 1 hour, followed by treatment with CPI-613 (200  $\mu$ M), gamitrinib-TPP (5  $\mu$ M), or erlotinib (10  $\mu$ M) and BCLXL/BCL2 inhibitor ABT-737 (5  $\mu$ M) for 5 hours. Efficacy of caspase block by Z-DEVD-FMK was confirmed by blotting for caspase 3. (B) LNCaP were treated with actinonin with or without BCLXL/BCL2 inhibitor ABT-263 (500 nM) for 5 hours.

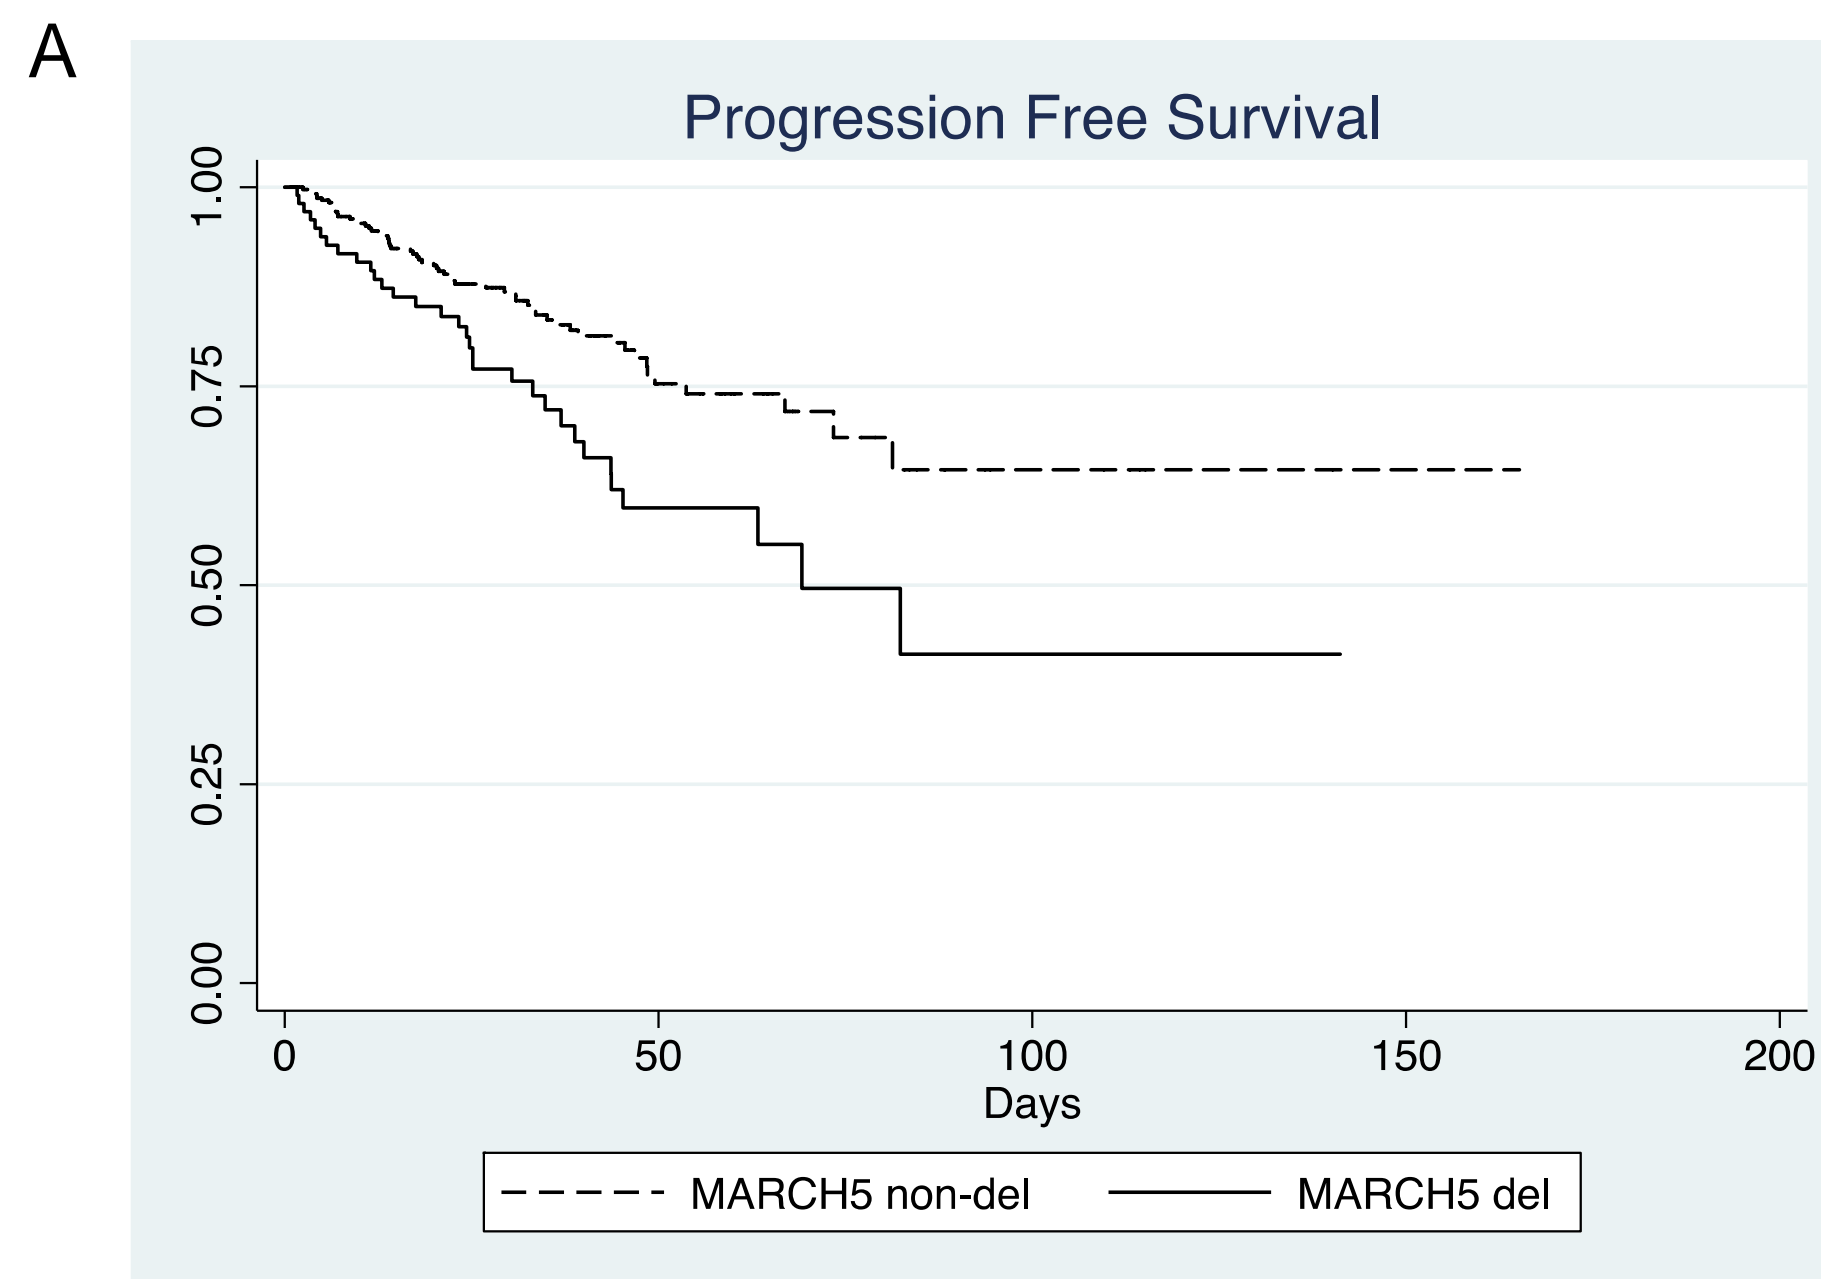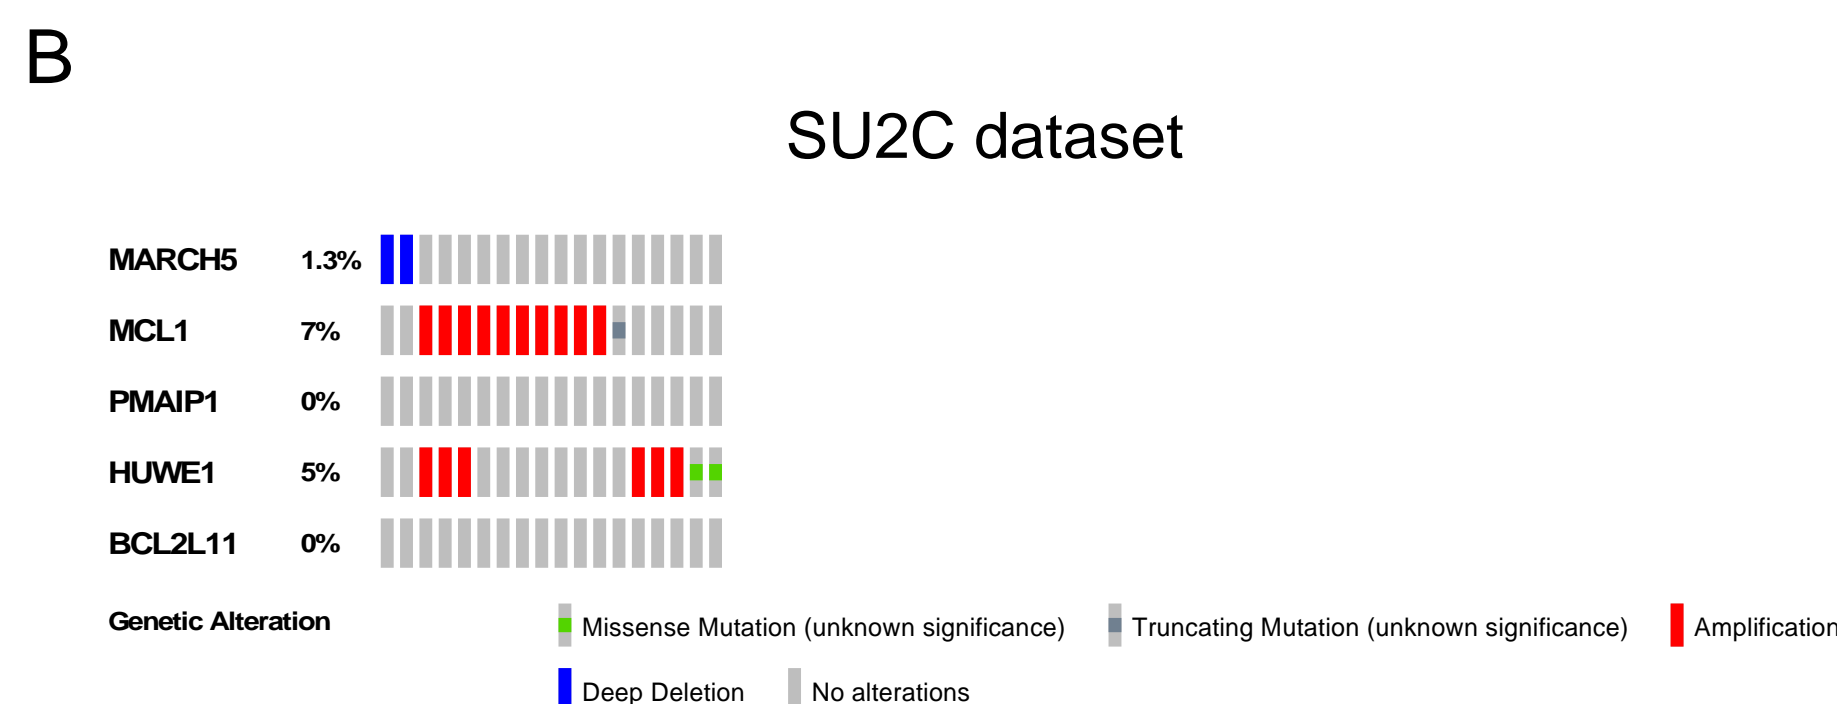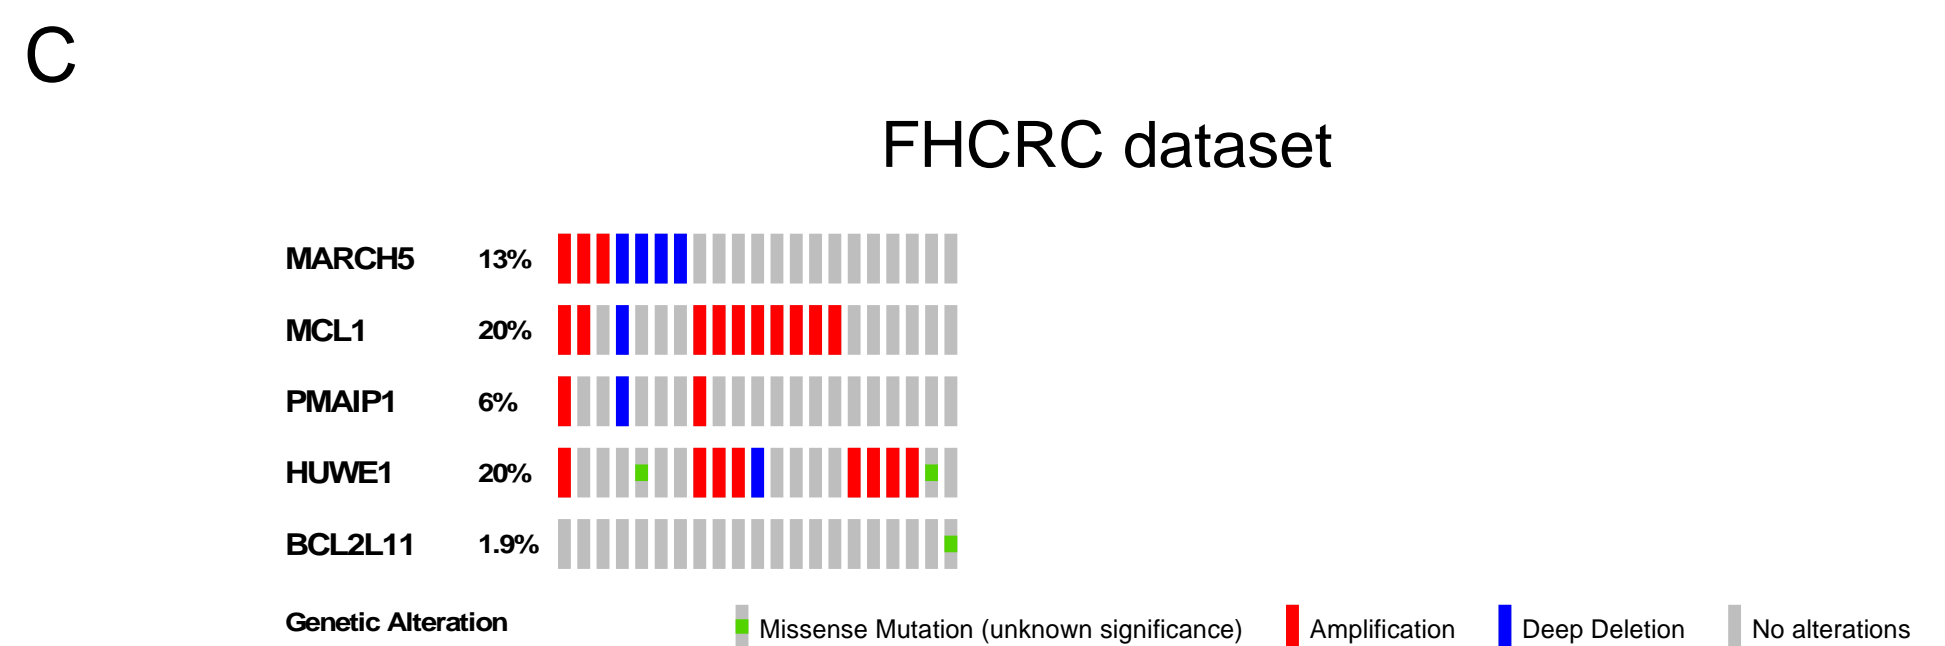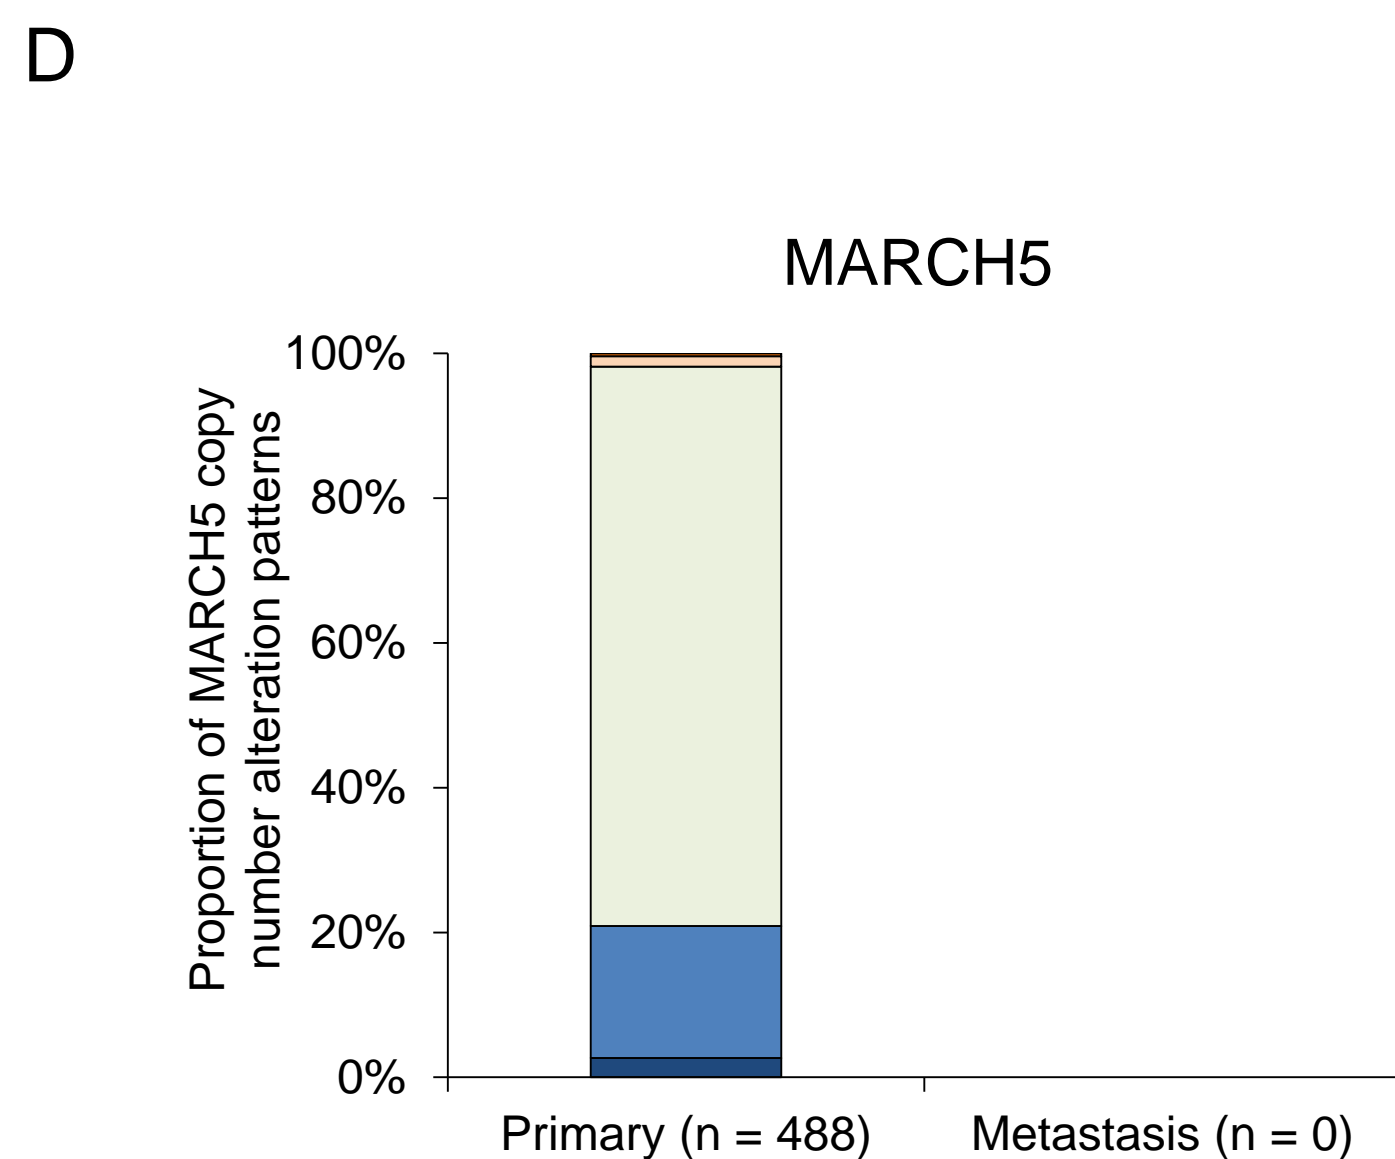

bioRxiv preprint doi: <https://doi.org/10.1101/2020.01.12.903369>; this version posted January 13, 2020. The copyright holder for this preprint (which was not certified by peer review) is the author/funder, who has granted bioRxiv a license to display the preprint in perpetuity. It is made available under aCC-BY 4.0 International license.

TCGA dataset

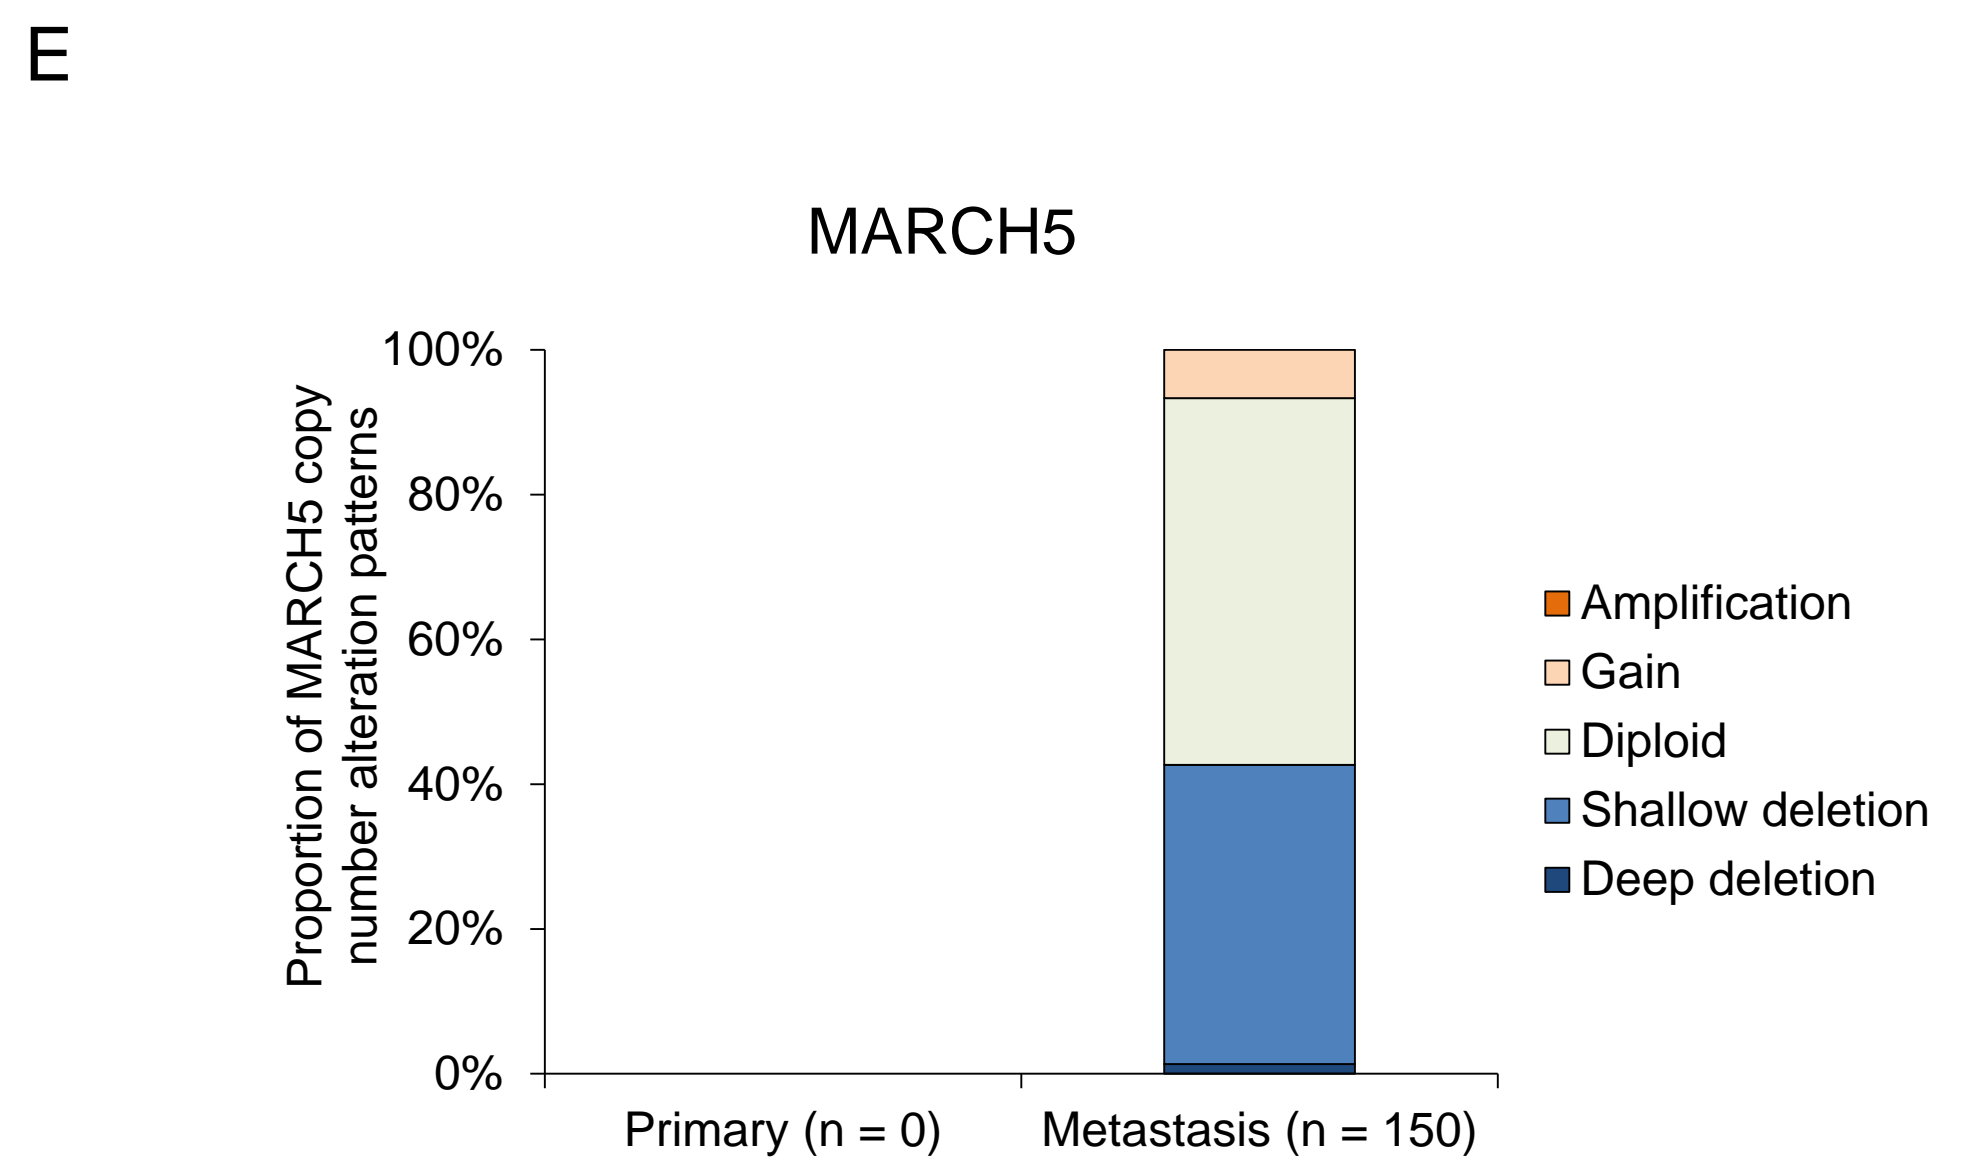

SU2C dataset

**Fig. S5 (Supplementary Fig. 6). MARCH5 deletion is observed in subsets of PCa patients.**

(A) Progression free survival for tumors with *MARCH5* deletion (deep and shallow) in TCGA data set. (B and C) Heatmap of gene alterations for *MARCH5*, *MCL1*, NOXA (*PMAIP*), MULE (*HUWE1*), and Bim (*BCL2L11*) in SU2C dataset (B) and FHCRC dataset (C). (D and E) Proportion of copy number alteration patterns for *MARCH5* in primary prostate tumor samples in TCGA dataset (D) and in metastatic prostate tumor samples in SU2C dataset (E).

A

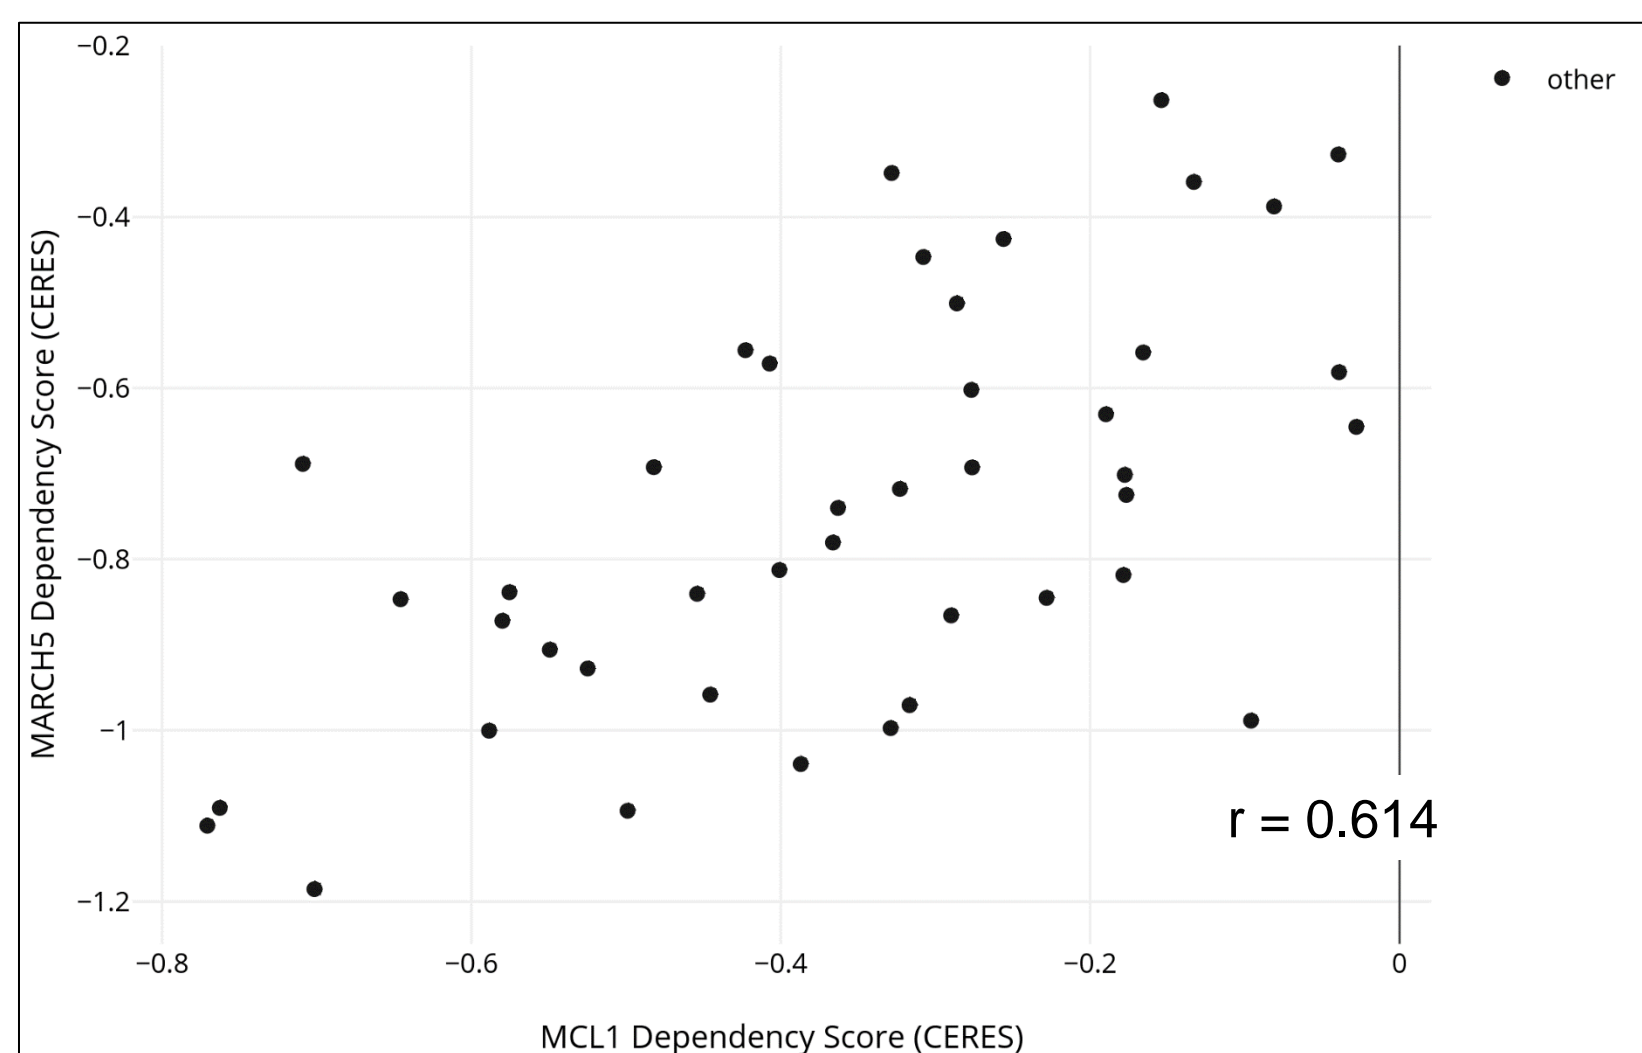

GeCKO CRISPR library

B

| Gene/Compound | Dataset             | Correlation |
|---------------|---------------------|-------------|
| EIF3G         | CRISPR (GeCKO) 19Q1 | -0.634      |
| CCDC62        | CRISPR (GeCKO) 19Q1 | 0.621       |
| MARCH5        | CRISPR (GeCKO) 19Q1 | 0.614       |
| BAG3          | CRISPR (GeCKO) 19Q1 | 0.583       |
| EPO           | CRISPR (GeCKO) 19Q1 | 0.582       |

Correlation with MCL1 dependency score

C

| Gene/Compound | Dataset             | Correlation |
|---------------|---------------------|-------------|
| ITPK1         | CRISPR (GeCKO) 19Q1 | -0.663      |
| GUCA1B        | CRISPR (GeCKO) 19Q1 | 0.621       |
| MCL1          | CRISPR (GeCKO) 19Q1 | 0.614       |
| PPIAL4G       | CRISPR (GeCKO) 19Q1 | -0.613      |
| PIGN          | CRISPR (GeCKO) 19Q1 | 0.599       |

Correlation with MARCH5 dependency score

**Fig. S6 (Supplementary Fig. 7). MARCH5 shows codependency with MCL1 in DepMap CRISPR-CAS9 essentiality screens in cancer cells.** (A) Correlation between *MCL1* and *MARCH5* dependency scores in cancer cells from CRISPR-CAS9 screens using GeCKO libraries. (B and C) Top 5 genes correlated with *MCL1* dependency score (B) or genes correlated with *MARCH5* dependency score (C) in cancer cells from CRISPR-CAS9 screens using GeCKO libraries.
